# Supplementary material for: Mycobacterium tuberculosis Affects Protein and Lipid Content of Circulating Exosomes in Infected Patients Depending on Tuberculosis Disease State
Source: MDPI journal article supplement (doi:10.3390/biomedicines10040783), 2022-03-27
Supplement: s1 [file s1]

**Table S1. Sociodemographic characteristics of study participants\***. Overview on sociodemographic parameters of study individuals. Numbers indicate absolute values of individuals.

|                                                  | HC | PTB | TBL | Rx |
|--------------------------------------------------|----|-----|-----|----|
| <b>Sex</b>                                       |    |     |     |    |
| Male                                             | 9  | 12  | 14  | 6  |
| Female                                           | 1  | 7   | 5   | 3  |
| <b>Age in years</b>                              |    |     |     |    |
| 0-24                                             | 2  | 6   | 6   | 4  |
| 25-44                                            | 6  | 9   | 8   | 5  |
| ≥45                                              | 2  | 4   | 5   | 0  |
| <b>Residence</b>                                 |    |     |     |    |
| Urban                                            | 1  | 5   | 8   | 8  |
| Rural                                            | 9  | 14  | 11  | 1  |
| <b>Education</b>                                 |    |     |     |    |
| Illiterate                                       | 3  | 8   | 6   | 1  |
| Above read and Write                             | 6  | 11  | 13  | 8  |
| <b>Smoking</b>                                   |    |     |     |    |
| Yes                                              | 0  | 0   | 0   | 0  |
| No                                               | 10 | 19  | 19  | 9  |
| <b>Alcohol intake</b>                            |    |     |     |    |
| Yes                                              | 5  | 13  | 11  | 4  |
| No                                               | 5  | 6   | 8   | 5  |
| <b>Chatting</b>                                  |    |     |     |    |
| Yes                                              | 0  | 1   | 0   | 0  |
| No                                               | 10 | 18  | 19  | 9  |
| <b>Comorbidity</b>                               |    |     |     |    |
| Yes                                              | 0  | 0   | 0   | 0  |
| No                                               | 10 | 19  | 19  | 9  |
| <b>TB history</b>                                |    |     |     |    |
| Yes, have taken and completed anti- TB treatment | 0  | 0   | 0   | 9  |
| No                                               | 10 | 19  | 19  | 0  |

\*Because of the small number of exosomes, 1 HC, 6PTB, 6 TBL, and 3Rx samples were excluded from exosome lipid analysis. HC- healthy control, PTB- pulmonary tuberculosis, TBL-tuberculosis lymphadenitis and Rx- pulmonary tuberculosis cases after anti-TB treatment
