# Supplementary material for: Mycobacterium tuberculosis Affects Protein and Lipid Content of Circulating Exosomes in Infected Patients Depending on Tuberculosis Disease State
Source: Biomedicines. 2022 Mar 27;10(4):783. doi: 10.3390/biomedicines10040783 (PMC9025801; doi:10.3390/biomedicines10040783)
Supplement: Supplementary file 1 [file biomedicines-10-00783-s001.zip]

Archive with 5 entries (5 files):
- Figures S1-S6.pdf
- Table S1.pdf
- Table S2.xlsx
- Table S3.xlsx
- Table S4.xlsx
