# Supplementary material for: Mycobacterium tuberculosis Affects Protein and Lipid Content of Circulating Exosomes in Infected Patients Depending on Tuberculosis Disease State
Source: Biomedicines. 2022 Mar 27;10(4):783. doi: 10.3390/biomedicines10040783 (PMC9025801; doi:10.3390/biomedicines10040783)
Supplement: Supplementary file 1 [file biomedicines-10-00783-s001.zip › Table S2.xlsx]

## Sheet: Table S2
Table S2
Surface marker profiles of isolated circulating exosomes at different disease and treatment states
	HC					PTB					TBL					Rx
	n1	n2	n3	mean	SEM	n1	n2	n3	mean	SEM	n1	n2	n3	mean	SEM	n1	n2	n3	mean	SEM
CD3	0.173554	0	0	0.0578512	0.0472353	0.0986842	0.0466639	0.0542532	0.0665338	0.0132467	-0.0408163	0.117117	0.109756	0.062019	0.0420182	0	0	0	0	0
CD4	-0.0123967	0	0	-0.00413223	0.00337395	-0.0107656	0.00491199	0	-0.00195119	0.00378011	-0.0612245	0.234234	0.27439	0.149133	0.0863982	0.0368304	0	0	0.0122768	0.010024
CD19	0	0	0	0	0	-0.0197368	0	0	-0.00657895	0.00537169	-0.0204082	0.045045	0	0.00821229	0.0157876	0	0.00357569	0.0440587	0.0158781	0.0115355
CD8	0.942149	0.511111	0.49763	0.650297	0.11919	0.0269139	0.0736799	0.0763563	0.0589834	0.0131075	0.0612245	0.783784	0.704268	0.516426	0.186778	0.415179	0.243147	0.228304	0.295543	0.0489661
MHC-II	1.58678	0.7	0.739336	1.0087	0.236179	0.100478	0.388047	0.421969	0.303498	0.0832673	0.238095	1.08108	0.978659	0.765945	0.216842	0.679688	0.353993	0.328438	0.454039	0.0923172
CD56	0.123967	0	0	0.0413223	0.0337395	0.00897129	0.019648	0.166778	0.0651325	0.041573	0.0136054	0	0	0.00453515	0.00370293	0	0	0	0	0
CD105	1.1281	0.255556	0.170616	0.51809	0.249839	0.0771531	0.028244	0	0.0351324	0.0184013	0.0680272	0	0	0.0226757	0.0185147	0	0	0	0	0
CD2	0.0123967	0.0111111	0.07109	0.0315326	0.0161521	0.0197368	0.00859599	0.0100469	0.0127932	0.00285527	-0.0408163	0.189189	0.128049	0.0921405	0.0561599	0.0636161	0.0393325	0.0200267	0.0409918	0.0102964
CD1c	0.0495868	0	0	0.0165289	0.0134958	-0.00538278	0.003684	0	-0.00056626	0.00214953	-0.047619	0.252252	0.265244	0.156626	0.0834388	0.00334821	0	0	0.00111607	0.000911269
CD25	-0.0371901	0	0	-0.0123967	0.0101219	0.0161483	0.019648	0.0170797	0.0176253	0.000854422	0.00680272	0.018018	0.0457317	0.0235175	0.00944633	0	0.00357569	0.0320427	0.0118728	0.00827735
CD49e	0	0	0.028436	0.00947867	0.0077393	0.40012	0.0577159	0.0522438	0.170026	0.093944	0.00680272	0.036036	0.0731707	0.0386698	0.01568	0.0133929	0.0143027	0.0280374	0.0185777	0.00386787
ROR1	0.0991736	0.1	0.056872	0.0853485	0.0116271	0.00358852	0.01228	0.0180844	0.0113176	0.00343922	-0.0272109	0.198198	0.192073	0.12102	0.0605323	0.15067	0.121573	0.11215	0.128131	0.00946573
CD209	-0.0247934	0	0	-0.00826446	0.00674791	0	0	0.00703282	0.00234427	0.00191409	-0.0952381	0.045045	0	-0.016731	0.0337632	0.0267857	0.00715137	0.0160214	0.0166528	0.00463503
CD9	0.756198	0.4	0.398104	0.518101	0.0972039	0.789474	0.956611	0.846952	0.864346	0.0400294	1.14286	0.306306	0.375	0.608054	0.218932	0.679688	0.657926	0.732977	0.690197	0.0182026
SSEA4	0.0123967	0.0777778	0.0995261	0.0632335	0.0213777	-0.00358852	0.185428	0.266242	0.149361	0.065282	-0.0272109	0.207207	0.256098	0.145365	0.0713898	0.046875	0.0715137	0.0680908	0.0621598	0.00629195
MHC-I	0.607438	0.0444444	0.028436	0.226773	0.155452	0.0933014	0.437167	0.465171	0.33188	0.0976226	0.0340136	0.324324	0.310976	0.223105	0.0772601	0.0234375	0.20739	0.216288	0.149039	0.0513193
CD63	0.657025	0.455556	0.483412	0.531998	0.0514627	2.04007	1.60991	1.48392	1.7113	0.137466	1.51701	0.936937	0.996951	1.1503	0.150375	1.33594	0.504172	0.508678	0.782929	0.225767
CD40	0.0867769	0	0.042654	0.0431436	0.0204545	0.148923	0.157184	0.136638	0.147582	0.00487366	0.197279	0.0720721	0.0457317	0.105028	0.0381698	0.0602679	0.0715137	0.0841121	0.0719646	0.00562317
CD62P	0.471074	0.144444	0.156398	0.257306	0.0873162	5.14593	5.12812	4.48292	4.91899	0.178075	5.96599	3.48649	3.18293	4.2118	0.719709	3.63951	3.08939	3.25234	3.32708	0.133206
CD11c	-0.123967	0.0333333	0.056872	-0.0112539	0.0463482	-0.0125598	0.00491199	0.00401875	-0.00120969	0.00463845	-0.0340136	0.0720721	0.0640244	0.0340276	0.0278424	0.0167411	0.0178784	0.00801068	0.0142101	0.00254504
CD81	1.58678	2.14444	2.11848	1.9499	0.148371	0.170455	0.433483	0.669123	0.424354	0.117596	0.340136	1.75676	1.62805	1.24165	0.369289	0.984375	1.8379	1.75834	1.52687	0.222267
MCSP	0.0371901	0	0	0.0123967	0.0101219	0.00538278	0.002456	0.00200938	0.00328272	0.000863784	-0.00680272	0.027027	0	0.00674144	0.00843535	0.0234375	0.0107271	0.0160214	0.0167286	0.00300976
CD146	0.18595	0.1	0.0853081	0.123753	0.0256271	0.00358852	0.027016	0.0241125	0.018239	0.00602006	-0.0408163	0.0990991	0.10061	0.0529642	0.0382874	0.0669643	0.0715137	0.116155	0.0848776	0.0128138
CD41b	1.01653	0.266667	0.184834	0.489343	0.216085	1.41567	1.39623	1.15439	1.3221	0.0686204	1.78231	0.873874	0.878049	1.17808	0.24668	1.16183	0.804529	0.865154	0.943838	0.090135
CD42a	0.508264	0.211111	0.199052	0.306143	0.0825649	0.62799	0.395415	0.464166	0.495857	0.0563245	2.22449	0.54955	0.530488	1.10151	0.458477	0.385045	0.386174	0.400534	0.390584	0.00407071
CD24	0.297521	0.277778	0.327014	0.300771	0.0116808	0.199163	0.034384	0.029136	0.0875609	0.045578	0.0612245	0.18018	0.182927	0.141444	0.0327558	0.107143	0.0536353	0.0761015	0.0789599	0.0126657
CD86	0.0371901	0.0333333	0.0853081	0.0519438	0.0136512	-0.0107656	0.00982399	0.0090422	0.00270021	0.00550046	-0.0816327	0.0720721	0.0365854	0.00900826	0.0379375	0.0234375	0.0286055	0.0280374	0.0266935	0.00133597
CD44	0.161157	0.111111	0.028436	0.100235	0.0315962	0.163278	0.0552599	0.0522438	0.0902604	0.0298176	0.115646	0.108108	0.118902	0.114219	0.00261012	0.0770089	0.057211	0.0720961	0.068772	0.00485975
CD326	-0.0743802	0	0	-0.0247934	0.0202437	0.00179426	0	0	0.000598086	0.000488335	-0.00680272	0	0	-0.00226757	0.00185147	0	0	0	0	0
CD133/1	0	0	0	0	0	0.0125598	0.00982399	0.0110516	0.0111451	0.000645969	0.0612245	0.00900901	0	0.0234112	0.0155826	0.0133929	0.0321812	0.0160214	0.0205318	0.00479602
CD29	0.520661	0.188889	0.184834	0.298128	0.0908538	3.375	2.40196	2.07368	2.61688	0.319027	1.88435	0.351351	0.384146	0.873284	0.41284	0.518973	0.83671	0.797063	0.717582	0.0816185
CD69	0.0495868	0	0.0853081	0.0449649	0.0201956	0.958134	0.446991	0.418955	0.608027	0.143083	0.197279	0.0900901	0.10061	0.129326	0.0278521	0.0669643	0.0715137	0.0841121	0.0741967	0.00418758
CD142	-0.0247934	0	0	-0.00826446	0.00674791	0.0394737	0.00982399	0.00703282	0.0187768	0.00847503	-0.047619	0	0	-0.015873	0.0129603	0.0267857	0.00357569	0.012016	0.0141258	0.00553805
CD45	0.0867769	0.0111111	0	0.0326293	0.0222602	0.626196	0.124028	0.122572	0.290932	0.136871	0.163265	0.333333	0.219512	0.238704	0.0408439	0.0200893	0.0178784	0.0280374	0.0220017	0.00251856
CD31	0	0.0222222	0	0.00740741	0.00604812	0.672847	0.299632	0.280308	0.417596	0.104305	0.319728	0.00900901	0.0365854	0.121774	0.0810753	0.0401786	0.100119	0.12016	0.0868193	0.0196182
CD20	-0.0123967	0	0.028436	0.00534644	0.00986876	0.00897129	0.00859599	0.0100469	0.00920472	0.000355009	-0.0340136	0.0900901	0.0457317	0.0339361	0.0296453	0.0200893	0.0500596	0.024032	0.0313936	0.0076768
CD14	0.0495868	0.0111111	0.07109	0.0439293	0.0143246	-0.0215311	0.01228	0.013061	0.00126994	0.00931031	-0.0884354	0.396396	0.429878	0.245946	0.136739	0	0.00357569	0.0360481	0.0132079	0.00936246
REA Control	-0.0247934	0	0	-0.00826446	0.00674791	-0.0179426	0.108064	0.223041	0.104387	0.0568202	0.0136054	0.495495	0.420732	0.309944	0.122256	0.0200893	0.0893921	0.0680908	0.0591907	0.0167341
mIgG1 Control	-0.0123967	0	0	-0.00413223	0.00337395	0.0502392	0.011052	0.00502344	0.0221049	0.0115734	0.0272109	0.027027	0.0457317	0.0333232	0.00506593	0	0.00715137	0.0280374	0.0117296	0.0068677

## Sheet: column descriptions
Column name	description
HC	healthy volunteers
PTB	pulmonary TB patients
TBL	TB lympadenitis patients
Rx	pulmonary TB patients after anti-TB treatment
n1	individual measurement of first replicate
n2	individual measurement of second replicate
n3	individual measurement of third replicate
mean	geometrical mean of individual measurements
SEM	standard error of the mean
