# Supplementary material for: Mycobacterium tuberculosis Affects Protein and Lipid Content of Circulating Exosomes in Infected Patients Depending on Tuberculosis Disease State
Source: Biomedicines. 2022 Mar 27;10(4):783. doi: 10.3390/biomedicines10040783 (PMC9025801; doi:10.3390/biomedicines10040783)
Supplement: Supplementary file 1 [file biomedicines-10-00783-s001.zip › Table S3.xlsx]

## Sheet: Table S3
Table S3
Protein identification, quantification and differential abundance analysis of exoxomal proteins
Protein information									ANOVA		PTB vs. HC			TBL vs. HC			TBL vs. PTB			Rx vs. PTB			normalized reporter ion intensities
Uniprot	gene.names	protein.names	BP_direct	CC_direct	MF_direct	Vesiclepedia Top 100	M. tuberculosis protein	Secreted to blood	adj.pval_ANOVA	sig_ANOVA	logFC_PTB vs. HC	adj.pval_PTB vs. HC	sig_PTB vs. HC	logFC_TBL vs. HC	adj.pval_TBL vs. HC	sig_TBL vs. HC	logFC_TBL vs. PTB	adj.pval_TBL vs. PTB	sig_TBL vs. PTB	logFC_Rx vs. PTB	adj.pval_Rx vs. PTB	sig_Rx vs. PTB	HC_1	HC_2	HC_3	HC_4	PTB_1	PTB_2	PTB_3	PTB_4	PTB_5	PTB_6	TBL_1	TBL_2	TBL_3	Rx_1	Rx_2	Rx_3
A0A075B6I0	IGLV8-61								0.915112		0.110594	0.879874		0.394636	0.608104		0.284042	0.705076		0.107414	0.885007		13.6979	15.7205	13.3254	15.2609	14.304	14.9637	14.4588	14.384	15.0409	14.5192	15.4663	15.2786	13.9425	14.6819	15.0688	14.4069
A0A075B6I1	IGLV4-60								0.0719672		2.25844	0.0506382		3.76856	0.00521985	+	1.51012	0.0533966						9.57213			12.0975	11.5508	11.8434				14.1041	13.8148	12.1032
A0A075B6I9	IGLV7-46								0.108876		-0.897725	0.210567		0.626569	0.426082		1.52429	0.0242344					13.6482	14.3456			12.981	13.6253	12.6912				15.1394	14.8738	13.8572
A0A075B6J9	IGLV2-18								0.213935		-0.314073	0.766443		0.863844	0.396763		1.17792	0.0758073						11.4946			10.8534	11.6371	11.051				12.9151	12.6057	11.5545
A0A075B6K0;P01718	IGLV3-16								0.130959		0.339051	0.693187		0.790727	0.323848		0.451676	0.400211						10.5272			10.849	11.0767	10.6731				11.6052	11.2585	11.09
A0A075B6K4;P01715	IGLV3-10								0.0344449		0.377051	0.739853		3.22513	0.00944238	+	2.84808	0.00966117	+	-1.06166	0.302765		12.2471	13.237	9.50678	11.0869	13.3734	12.8543	13.2071	10.4801	10.6832	10.781	15.364	15.2746	13.5952	11.0978	10.9504	10.4564
A0A075B6K5;P80748;A0A075B6K2	IGLV3-9;IGLV3-12	Ig lambda chain V-III region LOI							0.0386417		-0.273354	0.766443		2.11201	0.0225194		2.38537	0.00484451	+	-0.0264055	0.975171			11.0034	13.049	11.9269	10.6805	11.6466	11.0106	12.253	12.3891	12.3386	14.8817	14.903	12.5306	11.983	11.5512	11.5458
A0A075B6P5;A0A087WW87;P01615;P01614	IGKV2D-28;IGKV2-40	Ig kappa chain V-II region FR;Ig kappa chain V-II region Cum	GO:0006508~proteolysis,GO:0006898~receptor-mediated endocytosis,GO:0006955~immune response,GO:0006956~complement activation,GO:0006958~complement activation, classical pathway,GO:0038095~Fc-epsilon receptor signaling pathway,GO:0038096~Fc-gamma receptor signaling pathway involved in phagocytosis,GO:0050776~regulation of immune response,,GO:0006508~proteolysis,GO:0006898~receptor-mediated endocyto…	GO:0005576~extracellular region,GO:0005886~plasma membrane,GO:0070062~extracellular exosome,GO:0072562~blood microparticle,,GO:0005576~extracellular region,GO:0005886~plasma membrane,GO:0070062~extracellular exosome,GO:0072562~blood microparticle,	GO:0003823~antigen binding,GO:0004252~serine-type endopeptidase activity,				0.46969		-0.448059	0.574966		0.105257	0.91151		0.553316	0.400211					15.8114	16.8503			15.4884	16.3157	15.8444				16.619	16.6413	16.0481
A0A0C4DH68;A0A075B6R9	IGKV2-24;IGKV2D-24								0.124608		-1.86307	0.0303391		-0.645898	0.466174		1.21717	0.0881953					13.1746	11.5001			10.8187	10.2273	10.3768				11.8343	12.2324	11.0076
A2NJV5;A0A075B6S2;A0A0A0MRZ7;A0A075B6S6	IGKV A18;IGKV2D-29;IGKV2D-26;IGKV2D-30		GO:0002250~adaptive immune response,	GO:0005576~extracellular region,GO:0005886~plasma membrane,					0.0339821		0.844285	0.117341		1.78973	0.00944238	+	0.945444	0.106974		-0.776512	0.189502		11.9502	12.8633	12.2046	12.8481	12.4971	13.9418	12.8302	13.007	14.5081	13.0808	14.6592	14.6754	13.4342	12.8729	12.6174	12.1127
A0A075B7B8	IGHV3OR16-12								0.907937		-0.0109108	0.984311		-0.0381685	0.965252		-0.0272577	0.968829		-0.283722	0.611274		11.2755	10.6816	12.0038	10.5613	10.8882	11.0715	10.3347	11.4728	11.6527	11.298	11.8976	11.0639	10.3157	10.6675	11.0617	10.7785
A0A087WT59;P02766	TTR	Transthyretin	GO:0001523~retinoid metabolic process,GO:0006144~purine nucleobase metabolic process,GO:0006810~transport,GO:0030198~extracellular matrix organization,GO:0042572~retinol metabolic process,GO:0044267~cellular protein metabolic process,GO:0070327~thyroid hormone transport,	GO:0005576~extracellular region,GO:0005615~extracellular space,GO:0005737~cytoplasm,GO:0043234~protein complex,GO:0070062~extracellular exosome,	GO:0005179~hormone activity,GO:0005515~protein binding,GO:0042562~hormone binding,GO:0042802~identical protein binding,GO:0046982~protein heterodimerization activity,GO:0070324~thyroid hormone binding,			+	0.159291		1.88616	0.0780205		1.94225	0.0812192		0.0560906	0.953997						12.1464			13.6198	14.7052	13.7726				13.473	14.6852	14.1076
A6NNI4;A0A2R8Y478;A0A7I2V3T0;A0A7I2V3T7;G8JLH6;A0A087WU13;F5GXT1;P21926	CD9	Tetraspanin;CD9 antigen	GO:0002576~platelet degranulation,GO:0006928~movement of cell or subcellular component,GO:0007155~cell adhesion,GO:0007166~cell surface receptor signaling pathway,GO:0007342~fusion of sperm to egg plasma membrane,GO:0007420~brain development,GO:0008285~negative regulation of cell proliferation,GO:0009414~response to water deprivation,GO:0014003~oligodendrocyte development,GO:0030168~platelet acti…	GO:0005615~extracellular space,GO:0005886~plasma membrane,GO:0005887~integral component of plasma membrane,GO:0005925~focal adhesion,GO:0009897~external side of plasma membrane,GO:0016020~membrane,GO:0016021~integral component of membrane,GO:0016324~apical plasma membrane,GO:0030666~endocytic vesicle membrane,GO:0030669~clathrin-coated endocytic vesicle membrane,GO:0031092~platelet alpha granule …	GO:0005178~integrin binding,GO:0005515~protein binding,	+			0.0352678		2.73023	0.0122375		0.110127	0.941543		-2.6201	0.00555431	+	-1.67408	0.0715799		12.5128			10.8352	14.4658	13.6769	14.8061	14.6132	14.1982	14.6654	10.5034	10.6733	14.1758	12.4636	12.8869	12.84
A0A7I2V3H3;A0A7I2V5N4;A0A7I2V659;A0A087WVQ9;A0A2U3TZH3;Q5VTE0;P68104;Q05639	EEF1A1;EEF1A1P5;EEF1A2	Putative elongation factor 1-alpha-like 3;Elongation factor 1-alpha 1;Elongation factor 1-alpha 2	GO:0006351~transcription, DNA-templated,GO:0006355~regulation of transcription, DNA-templated,GO:0006414~translational elongation,GO:0071364~cellular response to epidermal growth factor stimulus,GO:1904714~regulation of chaperone-mediated autophagy,,GO:0006414~translational elongation,,GO:0006414~translational elongation,GO:0010035~response to inorganic substance,GO:0043065~positive regulation of…	GO:0005615~extracellular space,GO:0005634~nucleus,GO:0005730~nucleolus,GO:0005737~cytoplasm,GO:0005829~cytosol,GO:0005853~eukaryotic translation elongation factor 1 complex,GO:0016020~membrane,GO:0030864~cortical actin cytoskeleton,GO:0032587~ruffle membrane,GO:0070062~extracellular exosome,GO:0098574~cytoplasmic side of lysosomal membrane,,GO:0005615~extracellular space,GO:0005634~nucleus,GO:000…	GO:0000049~tRNA binding,GO:0003746~translation elongation factor activity,GO:0003924~GTPase activity,GO:0005515~protein binding,GO:0005525~GTP binding,GO:0019901~protein kinase binding,GO:0044822~poly(A) RNA binding,	+			0.224005		-0.976567	0.143439		-0.88772	0.212766		0.0888464	0.912777					14.0113	12.8481			12.8654	12.3276	12.1663				12.6466	12.842	12.1373
A0A087WWA2;A0A804HIZ1;E9PQQ5;A0A804HI41;H0YEA7;Q9UJJ9	GNPTG	N-acetylglucosamine-1-phosphotransferase subunit gamma	GO:0016256~N-glycan processing to lysosome,GO:0046835~carbohydrate phosphorylation,	GO:0000139~Golgi membrane,GO:0005794~Golgi apparatus,GO:0070062~extracellular exosome,	GO:0003976~UDP-N-acetylglucosamine-lysosomal-enzyme N-acetylglucosaminephosphotransferase activity,GO:0042803~protein homodimerization activity,				0.301126		-0.476508	0.787695								2.60041	0.0765487				12.0033	8.88818				9.72996	9.21562	10.9622				14.7793	11.6511	11.2785
A0A087WXI2;Q9Y6R7;A0A087WUZ2	FCGBP	IgGFc-binding protein		GO:0070062~extracellular exosome,	GO:0005515~protein binding,				0.146948		-0.15299	0.72197		-0.260932	0.588496		-0.107942	0.829909		-0.663654	0.110811		18.1558	18.396	18.0423	18.4642	18.2283	17.666	18.2323	18.5503	17.5546	18.4382	17.9883	18.2082	17.8145	16.9176	17.2758	18.1504
F8WCZ6;A0A087X232;P09871;F5H7T4;H0Y5D1	C1S	Complement C1s subcomponent;Complement C1s subcomponent heavy chain;Complement C1s subcomponent light chain	GO:0006508~proteolysis,GO:0006956~complement activation,GO:0006958~complement activation, classical pathway,GO:0045087~innate immune response,	GO:0005576~extracellular region,GO:0070062~extracellular exosome,GO:0072562~blood microparticle,	GO:0004252~serine-type endopeptidase activity,GO:0005509~calcium ion binding,GO:0005515~protein binding,GO:0042802~identical protein binding,GO:0046872~metal ion binding,			+	0.124608								0.42776	0.472992									11.1602	11.4035	11.2651				11.689	11.4401	11.983
A0A096LPE2;P35542;A0A3B3ISW8;E9PR14;G3V1D9;E9PQD6	SAA2-SAA4;SAA4	Serum amyloid A-4 protein	GO:0006953~acute-phase response,,GO:0006953~acute-phase response,GO:0050918~positive chemotaxis,GO:0060326~cell chemotaxis,	GO:0005576~extracellular region,,GO:0005576~extracellular region,GO:0005615~extracellular space,GO:0034364~high-density lipoprotein particle,GO:0070062~extracellular exosome,				+	8.53179e-05	+	-1.30623	0.00483553	+	-2.68985	3.23378e-05	+	-1.38362	0.00551266	+	-2.38688	7.8191e-05	+	19.2733	18.7159	19.0734	18.0174	17.5344	17.6748	17.8408	17.5643	16.7603	17.408	16.1118	15.8952	16.2334	15.7884	14.9454	14.4969
A0A0A0MRJ7;P12259;CON__Q28107	F5	Coagulation factor V;Coagulation factor V heavy chain;Coagulation factor V light chain	GO:0002576~platelet degranulation,GO:0006508~proteolysis,GO:0006888~ER to Golgi vesicle-mediated transport,GO:0007596~blood coagulation,GO:0008015~blood circulation,GO:0030168~platelet activation,GO:0048208~COPII vesicle coating,	GO:0000139~Golgi membrane,GO:0005576~extracellular region,GO:0005615~extracellular space,GO:0005788~endoplasmic reticulum lumen,GO:0005886~plasma membrane,GO:0016020~membrane,GO:0030134~ER to Golgi transport vesicle,GO:0031093~platelet alpha granule lumen,GO:0033116~endoplasmic reticulum-Golgi intermediate compartment membrane,GO:1903561~extracellular vesicle,	GO:0004252~serine-type endopeptidase activity,GO:0005507~copper ion binding,GO:0005515~protein binding,			+	0.0249804		0.238512	0.607641		-0.373369	0.500312		-0.611881	0.164504		0.800517	0.0765487		14.8731	15.1494	16.3596	15.4619	15.2664	15.441	15.5774	16.0232	15.7183	16.1705	15.2843	14.9142	15.0643	16.2202	16.6399	16.6399
A0A0A0MRZ8;P04433	IGKV3D-11	Ig kappa chain V-III region VG	GO:0006508~proteolysis,GO:0006898~receptor-mediated endocytosis,GO:0006955~immune response,GO:0006956~complement activation,GO:0006958~complement activation, classical pathway,GO:0038095~Fc-epsilon receptor signaling pathway,GO:0038096~Fc-gamma receptor signaling pathway involved in phagocytosis,GO:0050776~regulation of immune response,	GO:0005576~extracellular region,GO:0005886~plasma membrane,GO:0070062~extracellular exosome,GO:0072562~blood microparticle,	GO:0003823~antigen binding,GO:0004252~serine-type endopeptidase activity,				0.846677		-0.102492	0.913789		0.196891	0.844321		0.299383	0.694737					14.1484	15.768			14.5694	15.2473	14.7505				15.2577	15.1818	15.0258
A0A0A0MS08;P01857;A0A0A0MS07	IGHG1	Ig gamma-1 chain C region	GO:0006508~proteolysis,GO:0006910~phagocytosis, recognition,GO:0006911~phagocytosis, engulfment,GO:0006956~complement activation,GO:0006958~complement activation, classical pathway,GO:0038096~Fc-gamma receptor signaling pathway involved in phagocytosis,GO:0042742~defense response to bacterium,GO:0045087~innate immune response,GO:0050853~B cell receptor signaling pathway,GO:0050871~positive regula…	GO:0005576~extracellular region,GO:0005615~extracellular space,GO:0009897~external side of plasma membrane,GO:0016021~integral component of membrane,GO:0042571~immunoglobulin complex, circulating,GO:0070062~extracellular exosome,GO:0072562~blood microparticle,	GO:0003823~antigen binding,GO:0004252~serine-type endopeptidase activity,GO:0005515~protein binding,GO:0034987~immunoglobulin receptor binding,				0.024314		0.487388	0.411402		1.43423	0.0329214		0.946839	0.112495		1.52576	0.0222226		16.9803	15.5369	17.6382	16.3581	16.6502	17.2274	16.5752	17.3957	17.6662	17.1801	18.3399	18.2872	17.5608	19.705	18.1377	18.082
A0A0A0MS15	IGHV3-49								0.182157		-0.901351	0.193641								1.0499	0.09821				11.3816	12.3731				11.2596	10.3156	11.3529				11.6322	12.3216	12.1239
A0A0A0MSD0;Q4LDE5	SVEP1	Sushi, von Willebrand factor type A, EGF and pentraxin domain-containing protein 1	GO:0007155~cell adhesion,	GO:0005576~extracellular region,GO:0005737~cytoplasm,GO:0016020~membrane,	GO:0003682~chromatin binding,GO:0005509~calcium ion binding,GO:0030246~carbohydrate binding,
R4GMZ8;A0A0A0MSI6;B7Z1P2;Q9H4M3	FBXO44	F-box only protein 44		GO:0019005~SCF ubiquitin ligase complex,	GO:0005515~protein binding,
A0A0A0MSV6;D6R934;P02746;D6RGJ1	C1QB	Complement C1q subcomponent subunit B	GO:0006508~proteolysis,GO:0006956~complement activation,GO:0006958~complement activation, classical pathway,GO:0045087~innate immune response,GO:0048839~inner ear development,	GO:0005576~extracellular region,GO:0005581~collagen trimer,GO:0005602~complement component C1 complex,GO:0070062~extracellular exosome,GO:0072562~blood microparticle,	GO:0004252~serine-type endopeptidase activity,GO:0005515~protein binding,GO:0042803~protein homodimerization activity,			+	0.851317		0.167171	0.825075		0.557517	0.509268		0.390346	0.61214		0.136266	0.878618		12.4555	15.412	13.6717	15.3709	14.0851	14.8563	14.2404	14.3016	14.6266	14.2583	15.0547	15.1521	14.1484	14.1496	14.5505	14.8929
A0A0A0MTH3;Q13418	ILK	Integrin-linked protein kinase	GO:0001658~branching involved in ureteric bud morphogenesis,GO:0001954~positive regulation of cell-matrix adhesion,GO:0003151~outflow tract morphogenesis,GO:0006468~protein phosphorylation,GO:0006469~negative regulation of protein kinase activity,GO:0007050~cell cycle arrest,GO:0007160~cell-matrix adhesion,GO:0007229~integrin-mediated signaling pathway,GO:0007569~cell aging,GO:0008283~cell prolif…	GO:0001725~stress fiber,GO:0005654~nucleoplasm,GO:0005737~cytoplasm,GO:0005829~cytosol,GO:0005886~plasma membrane,GO:0005911~cell-cell junction,GO:0005925~focal adhesion,GO:0016020~membrane,GO:0030017~sarcomere,GO:0030027~lamellipodium,GO:0030054~cell junction,GO:0031012~extracellular matrix,GO:0043025~neuronal cell body,GO:0043034~costamere,GO:0043195~terminal bouton,GO:0043198~dendritic shaft,G…	GO:0004672~protein kinase activity,GO:0004674~protein serine/threonine kinase activity,GO:0004871~signal transducer activity,GO:0005178~integrin binding,GO:0005515~protein binding,GO:0005524~ATP binding,GO:0017124~SH3 domain binding,GO:0019901~protein kinase binding,				0.978536		-0.159731	0.884466		-0.159753	0.903757		-2.16026e-05	0.999963						11.3792			10.4611	11.6364	11.561				10.847	10.9714	11.84
A0A0B4J1U7	IGHV6-1								0.429859		-0.761646	0.202738		-0.741675	0.326979		0.019971	0.980324		0.532774	0.408363		14.9506	15.1965	13.0622	14.9308	13.9185	15.1613	13.8863	13.3365	13.0443	13.2934	13.8475	13.9173	13.6154	14.4063	14.2137	14.2985
A0A0B4J1V6;A0A0B4J1V0	IGHV3-73								0.0024283		-2.53926	0.00103248	+	-1.61331	0.0169016		0.925949	0.0881953					13.4884	13.8261			11.0192	11.0229	11.3118				12.1264	12.3039	11.7015
A0A0B4J1X5;A0A075B7E8;A0A0J9YVY3	IGHV3-74;IGHV3OR16-13								0.00898168	+	-0.71361	0.105867		0.690019	0.212766		1.40363	0.00543132	+	1.41898	0.0119364		13.709	14.2963	13.266	14.2978	13.1062	13.583	13.119	13.1253	13.1974	12.9411	15.0043	14.9631	13.7796	14.1584	15.0799	14.5546
A0A0B4J1X8	IGHV3-43								0.0134871		-0.227654	0.704299		1.38043	0.0205122		1.60808	0.00201958	+	0.22046	0.631548			11.4598		11.2768	11.3405	11.8075	11.2708	10.9374	11.1161	10.3715	12.9673	13.1464	12.1324	11.3188	11.6119	11.1526
A0A0B4J1Y8	IGLV9-49								0.000990475	+	-0.360503	0.484306		2.27409	0.000361921	+	2.6346	0.000106686	+	-0.201574	0.700728		13.5751	13.639	13.2764	13.7361	13.2519	13.3808	13.299	13.4834	12.4147	13.347	16.3285	16.5219	14.6417	13.4255	12.9652	12.5929
A0A0B4J231;B9A064;A0A5H1ZRQ4;P0CG04	IGLL5;IGLC1	Immunoglobulin lambda-like polypeptide 5;Ig lambda-1 chain C regions	GO:0006910~phagocytosis, recognition,GO:0006911~phagocytosis, engulfment,GO:0006958~complement activation, classical pathway,GO:0042742~defense response to bacterium,GO:0045087~innate immune response,GO:0050853~B cell receptor signaling pathway,GO:0050871~positive regulation of B cell activation,,GO:0006508~proteolysis,GO:0006898~receptor-mediated endocytosis,GO:0006910~phagocytosis, recognition,…	GO:0009897~external side of plasma membrane,GO:0042571~immunoglobulin complex, circulating,GO:0070062~extracellular exosome,GO:0072562~blood microparticle,,GO:0005576~extracellular region,GO:0005615~extracellular space,GO:0005886~plasma membrane,GO:0009897~external side of plasma membrane,GO:0042571~immunoglobulin complex, circulating,GO:0070062~extracellular exosome,GO:0072562~blood microparticl…	GO:0003823~antigen binding,GO:0034987~immunoglobulin receptor binding,			+	0.00626749	+	0.058809	0.913789		1.9264	0.00170368	+	1.86759	0.00176476	+	0.73057	0.147851		16.5701	17.2122	17.2747	17.556	16.5837	17.4762	16.8032	17.1953	17.677	17.537	19.498	19.6367	18.1043	17.7181	18.2619	17.8479
P0DP09;A0A0B4J2D9	IGKV1D-13								0.286843		-0.0979986	0.913789		-0.730952	0.411683		-0.632953	0.271989						11.8865			11.3732	11.6244	12.368				11.1291	10.9376	11.3999
A0A0C4DGZ8;P07359	GP1BA	Platelet glycoprotein Ib alpha chain;Glycocalicin	GO:0000902~cell morphogenesis,GO:0006469~negative regulation of protein kinase activity,GO:0007155~cell adhesion,GO:0007166~cell surface receptor signaling pathway,GO:0007596~blood coagulation,GO:0007597~blood coagulation, intrinsic pathway,GO:0019221~cytokine-mediated signaling pathway,GO:0030168~platelet activation,GO:0030193~regulation of blood coagulation,GO:0042730~fibrinolysis,GO:0046426~ne…	GO:0005737~cytoplasm,GO:0005886~plasma membrane,GO:0005887~integral component of plasma membrane,GO:0009986~cell surface,GO:0016020~membrane,GO:0016021~integral component of membrane,GO:0031362~anchored component of external side of plasma membrane,GO:0070062~extracellular exosome,	GO:0004860~protein kinase inhibitor activity,GO:0005515~protein binding,GO:0015057~thrombin receptor activity,				0.617819		-0.608842	0.510658								0.504831	0.495581				11.1659	10.4115				9.96292	10.1497	10.4268				11.3355	11.1216	9.59685
A0A0C4DH25	IGKV3D-20		GO:0002250~adaptive immune response,	GO:0005576~extracellular region,GO:0005886~plasma membrane,					0.0684201		-1.28172	0.0432872		-0.800664	0.211683		0.481058	0.389574					13.5822	14.3267			12.3266	13.1534	12.5381				13.1431	13.2021	13.1161
A0A0C4DH31;P23083	IGHV1-18								0.0282423		0.24091	0.654631		1.40328	0.0140112		1.16237	0.0199872		0.469277	0.327259		12.1209	12.8978	13.4406	12.6074	12.6854	13.7166	12.9611	12.8088	12.6534	13.2203	14.6103	14.4847	13.4149	13.5877	13.3214	13.5216
A0A0C4DH32	IGHV3-20								0.603358		-0.854948	0.389304								0.203047	0.825354				11.7895	9.6927				9.51775	10.5027	9.63805				10.6569	9.9686	9.64214
A0A0C4DH34	IGHV4-28								0.00184257	+	-0.125882	0.789562		1.24821	0.0169016		1.3741	0.00535383	+	1.76141	0.00150642	+	13.3904	13.3596	13.7378	13.2414	13.3051	12.9019	13.1904	13.8175	13.249	13.3747	15.2319	14.9872	13.8224	14.8071	15.6524	14.744
A0A0C4DH35	IGHV3-35								0.210575		-0.707027	0.220442		0.126883	0.891414		0.83391	0.144535		0.86944	0.133396			11.5099	13.0895	11.4503	10.8234	11.287	10.5393	11.5756	12.2282	11.4035	12.178	12.5179	11.7344	12.4753	11.9432	12.1183
A0A0C4DH38;A0A0J9YXX1	IGHV5-51								0.0419945		-0.635653	0.214869		0.726169	0.251718		1.36182	0.00966117	+	0.773614	0.133341		14.301	15.2719		14.9434	14.0237	14.7342	14.2746	13.9008	14.5313	13.7541	15.9163	15.9865	14.792	14.5548	15.6032	14.7721
P0DP08;P0DP06;A0A0C4DH41;P01825;P06331;P01824;A0A0J9YWU9;A0A087WW49;A0A075B6R2;P0DP07;A0A087WSY4	IGHV4-61	Ig heavy chain V-II region NEWM;Ig heavy chain V-II region ARH-77;Ig heavy chain V-II region WAH							0.0195333		-0.981606	0.0237022		0.373907	0.504672		1.35551	0.00543132	+	0.76179	0.0999535		14.6685	14.6229	14.442	14.7107	13.7493	14.017	13.7428	13.6566	13.3097	13.3011	15.3535	15.5441	14.0572	14.0885	15.1146	13.9706
A0A0C4DH73;A0A0C4DH72;P04432;P01611;P01597	IGKV1-12;IGKV1-6	Ig kappa chain V-I region Daudi;Ig kappa chain V-I region Wes;Ig kappa chain V-I region DEE	GO:0002250~adaptive immune response,	GO:0005576~extracellular region,GO:0005886~plasma membrane,					0.131007		-0.373838	0.704299		0.383316	0.676361		0.757154	0.209633						13.3082			12.9454	13.2979	12.5599				13.6549	13.8734	13.5463
F5GXS0;A0A140TA44;A0A0G2JL54;P0C0L5;A0A140TA49;A0A140TA32;A0A140TA29;A0A0G2JPR0;P0C0L4;A0A3B3ISA6;A0A3B3ISD7;CON__P01030;CON__ENSEMBL:ENSBTAP00000007350	C4B;C4A	Complement C4-B;Complement C4 beta chain;Complement C4-B alpha chain;C4a anaphylatoxin;C4b-B;C4d-B;Complement C4 gamma chain;Complement C4-A;Complement C4 beta chain;Complement C4-A alpha chain;C4a anaphylatoxin;C4b-A;C4d-A;Complement C4 gamma chain	GO:0006508~proteolysis,GO:0006954~inflammatory response,GO:0006956~complement activation,GO:0006958~complement activation, classical pathway,GO:0008228~opsonization,GO:0010951~negative regulation of endopeptidase activity,GO:0030449~regulation of complement activation,GO:0032490~detection of molecule of bacterial origin,GO:0045087~innate immune response,GO:2000427~positive regulation of apoptotic…	GO:0005576~extracellular region,GO:0005615~extracellular space,GO:0005886~plasma membrane,GO:0030054~cell junction,GO:0030424~axon,GO:0030425~dendrite,GO:0043025~neuronal cell body,GO:0044216~other organism cell,GO:0045202~synapse,GO:0070062~extracellular exosome,GO:0072562~blood microparticle,,GO:0005576~extracellular region,GO:0005615~extracellular space,GO:0005886~plasma membrane,GO:0030054~ce…	GO:0001848~complement binding,GO:0001849~complement component C1q binding,GO:0004252~serine-type endopeptidase activity,GO:0004866~endopeptidase inhibitor activity,GO:0030246~carbohydrate binding,			+	0.0134871		1.23448	0.00353442	+	0.614567	0.216581		-0.619913	0.146576		-0.496359	0.228634		16.4164	15.8928	15.5612	15.6685	17.5044	16.7541	17.6955	17.0453	16.789	16.9268	16.619	16.3038	16.5751	17.145	16.4615	16.262
A0A0G2JMB2;A0A286YEY5;P01877	IGHA2	Ig alpha-2 chain C region	GO:0001895~retina homeostasis,GO:0003094~glomerular filtration,GO:0006898~receptor-mediated endocytosis,GO:0006910~phagocytosis, recognition,GO:0006911~phagocytosis, engulfment,GO:0006955~immune response,GO:0006958~complement activation, classical pathway,GO:0019731~antibacterial humoral response,GO:0045087~innate immune response,GO:0050853~B cell receptor signaling pathway,GO:0050871~positive re…	GO:0005576~extracellular region,GO:0005615~extracellular space,GO:0009897~external side of plasma membrane,GO:0070062~extracellular exosome,GO:0071748~monomeric IgA immunoglobulin complex,GO:0071751~secretory IgA immunoglobulin complex,GO:0071752~secretory dimeric IgA immunoglobulin complex,GO:0072562~blood microparticle,	GO:0003823~antigen binding,GO:0034987~immunoglobulin receptor binding,				0.0463615		0.845707	0.117341								-0.270213	0.578298				13.8418	13.3109				14.5708	14.4307	14.2647				14.1825	14.0059	14.2671
C9JMH6;A0A0J9YY65;C9JPV4;A0A0J9YWQ3;P08697	SERPINF2	Alpha-2-antiplasmin	GO:0002034~regulation of blood vessel size by renin-angiotensin,GO:0002576~platelet degranulation,GO:0006953~acute-phase response,GO:0010033~response to organic substance,GO:0010757~negative regulation of plasminogen activation,GO:0010951~negative regulation of endopeptidase activity,GO:0030199~collagen fibril organization,GO:0032967~positive regulation of collagen biosynthetic process,GO:0042730…	GO:0005576~extracellular region,GO:0005577~fibrinogen complex,GO:0005615~extracellular space,GO:0009986~cell surface,GO:0031093~platelet alpha granule lumen,GO:0070062~extracellular exosome,GO:0072562~blood microparticle,	GO:0002020~protease binding,GO:0004866~endopeptidase inhibitor activity,GO:0004867~serine-type endopeptidase inhibitor activity,GO:0005515~protein binding,GO:0042803~protein homodimerization activity,			+	0.277526		-0.296872	0.704466		-0.822259	0.323848		-0.525387	0.400211		0.6782	0.228634			9.33925		9.22915	8.56313	8.96865	8.09293	9.66043	9.16495	9.47387	7.77202	8.51497	9.09883	10.6861	9.10146	9.20904
H3BPV5;H3BM88;A0A0J9YXH6;J3KNK7;Q86XE2;Q6P474;Q6P996	PDXDC1;PDXDC2P	Putative pyridoxal-dependent decarboxylase domain-containing protein 2;Pyridoxal-dependent decarboxylase domain-containing protein 1	GO:0019752~carboxylic acid metabolic process,GO:0098609~cell-cell adhesion,,GO:0019752~carboxylic acid metabolic process,	GO:0005794~Golgi apparatus,GO:0005913~cell-cell adherens junction,GO:0043231~intracellular membrane-bounded organelle,	GO:0003824~catalytic activity,GO:0016831~carboxy-lyase activity,GO:0030170~pyridoxal phosphate binding,GO:0098641~cadherin binding involved in cell-cell adhesion,				0.0143668		0.258169	0.704299		-0.692404	0.268691		-0.950572	0.0698578					15.1355	15.5318			15.6804	15.6077	15.4873				14.6736	14.4614	14.7887
G5E9F8;A0A3B3ISJ1;A0A0S2Z4L3;P07225;A0A3B3IRK9;A0A3B3IUA6;C9K0R0	PROS1	Vitamin K-dependent protein S	GO:0002576~platelet degranulation,GO:0006465~signal peptide processing,GO:0006888~ER to Golgi vesicle-mediated transport,GO:0007596~blood coagulation,GO:0010951~negative regulation of endopeptidase activity,GO:0017187~peptidyl-glutamic acid carboxylation,GO:0030195~negative regulation of blood coagulation,GO:0030449~regulation of complement activation,GO:0042730~fibrinolysis,GO:0050900~leukocyte …	GO:0000139~Golgi membrane,GO:0005576~extracellular region,GO:0005615~extracellular space,GO:0005789~endoplasmic reticulum membrane,GO:0005796~Golgi lumen,GO:0005886~plasma membrane,GO:0016021~integral component of membrane,GO:0031093~platelet alpha granule lumen,GO:0070062~extracellular exosome,GO:0072562~blood microparticle,	GO:0004866~endopeptidase inhibitor activity,GO:0005509~calcium ion binding,			+	0.0141191		0.239732	0.554427		-0.667706	0.12999		-0.907438	0.0199872		-0.71718	0.0715799		17.3316	17.6541	16.8086	17.6287	17.4667	17.5726	17.5537	17.6206	17.6325	17.7268	16.4477	16.6416	16.9749	16.4259	16.9395	17.2695
A0A1W2PPI7;O75382	TRIM3	Tripartite motif-containing protein 3	GO:0007399~nervous system development,GO:0015031~protein transport,GO:0016567~protein ubiquitination,	GO:0005622~intracellular,GO:0005737~cytoplasm,GO:0005769~early endosome,GO:0005794~Golgi apparatus,GO:0030425~dendrite,	GO:0005515~protein binding,GO:0008022~protein C-terminus binding,GO:0008270~zinc ion binding,GO:0061630~ubiquitin protein ligase activity,				0.179675		-1.34603	0.0569394		-0.864543	0.331904		0.48149	0.572401		-0.22072	0.793103		13.9768	11.1071	13.3628	11.1165	10.6194	11.027	10.3504	11.6272	11.0269	11.6179	12.0389	11.9386	10.6013	10.6497	11.0314	10.7911
A0A1W2PQM2;P0DPH8;P0DPH7;F5H5D3;Q9BQE3;Q6PEY2;Q71U36;P68363;F8VRK0;F8VX09;F8VWV9;F8VRZ4;F8VS66;A0A7P0Z4A1;F8VQQ4;F8W0F6;F8VVB9;V9GZ17;A0A7P0T945;C9J2C0;P68366;Q9NY65	TUBA1C;TUBA3E;TUBA1A;TUBA1B;TUBA8;TUBA4A	Tubulin alpha-1C chain;Tubulin alpha-3E chain;Tubulin alpha-1A chain;Tubulin alpha-1B chain;Tubulin alpha-4A chain;Tubulin alpha-8 chain	GO:0007010~cytoskeleton organization,GO:0007017~microtubule-based process,GO:0030705~cytoskeleton-dependent intracellular transport,GO:0051301~cell division,,GO:0007010~cytoskeleton organization,GO:0007017~microtubule-based process,,GO:0000086~G2/M transition of mitotic cell cycle,GO:0007010~cytoskeleton organization,GO:0007017~microtubule-based process,GO:0030705~cytoskeleton-dependent intracell…	GO:0005634~nucleus,GO:0005737~cytoplasm,GO:0005874~microtubule,GO:0005881~cytoplasmic microtubule,GO:0031982~vesicle,,GO:0005634~nucleus,GO:0005737~cytoplasm,GO:0005874~microtubule,,GO:0005634~nucleus,GO:0005829~cytosol,GO:0005874~microtubule,GO:0005881~cytoplasmic microtubule,GO:0036464~cytoplasmic ribonucleoprotein granule,GO:0043209~myelin sheath,GO:0055037~recycling endosome,GO:0070062~extrac…	GO:0003924~GTPase activity,GO:0005198~structural molecule activity,GO:0005200~structural constituent of cytoskeleton,GO:0005515~protein binding,GO:0005525~GTP binding,				0.684628		0.545943	0.58184		-0.106374	0.935249		-0.652317	0.437582					13.1887	11.8763			13.1806	12.8412	13.2135				11.668	11.8703	13.7401
A0A4W9A917;A0A286YES1;P01860	IGHG3	Ig gamma-3 chain C region	GO:0001895~retina homeostasis,GO:0006508~proteolysis,GO:0006910~phagocytosis, recognition,GO:0006911~phagocytosis, engulfment,GO:0006956~complement activation,GO:0006958~complement activation, classical pathway,GO:0038096~Fc-gamma receptor signaling pathway involved in phagocytosis,GO:0042742~defense response to bacterium,GO:0045087~innate immune response,GO:0050853~B cell receptor signaling path…	GO:0005576~extracellular region,GO:0005615~extracellular space,GO:0009897~external side of plasma membrane,GO:0042571~immunoglobulin complex, circulating,GO:0070062~extracellular exosome,GO:0072562~blood microparticle,	GO:0003823~antigen binding,GO:0004252~serine-type endopeptidase activity,GO:0034987~immunoglobulin receptor binding,				0.0419945		0.325796	0.515208		1.23932	0.0205122		0.913523	0.0533966		0.571661	0.22109		15.9655	15.5688	16.5467	15.5084	15.8153	16.5367	15.8804	16.2319	16.741	16.1335	17.2859	17.5343	16.5898	16.8396	16.162	17.3828
A0A286YEY1;P01876	IGHA1	Ig alpha-1 chain C region	GO:0001895~retina homeostasis,GO:0003094~glomerular filtration,GO:0006898~receptor-mediated endocytosis,GO:0006910~phagocytosis, recognition,GO:0006911~phagocytosis, engulfment,GO:0006955~immune response,GO:0006958~complement activation, classical pathway,GO:0018298~protein-chromophore linkage,GO:0019731~antibacterial humoral response,GO:0045087~innate immune response,GO:0050853~B cell receptor s…	GO:0005576~extracellular region,GO:0005615~extracellular space,GO:0009897~external side of plasma membrane,GO:0070062~extracellular exosome,GO:0071748~monomeric IgA immunoglobulin complex,GO:0071751~secretory IgA immunoglobulin complex,GO:0071752~secretory dimeric IgA immunoglobulin complex,GO:0072562~blood microparticle,	GO:0003823~antigen binding,GO:0034987~immunoglobulin receptor binding,				0.0386417		0.848771	0.0386099		0.985066	0.0437776		0.136295	0.79871		-0.141432	0.764671		17.31	16.8443	17.8253	16.7101	17.4967	18.4447	17.6251	18.028	18.5734	17.9593	18.1058	18.2566	18.11	17.869	17.8864	17.8839
A0A286YEY4;P01859	IGHG2	Ig gamma-2 chain C region	GO:0006508~proteolysis,GO:0006910~phagocytosis, recognition,GO:0006911~phagocytosis, engulfment,GO:0006956~complement activation,GO:0006958~complement activation, classical pathway,GO:0038096~Fc-gamma receptor signaling pathway involved in phagocytosis,GO:0042742~defense response to bacterium,GO:0045087~innate immune response,GO:0050853~B cell receptor signaling pathway,GO:0050871~positive regula…	GO:0005576~extracellular region,GO:0005615~extracellular space,GO:0009897~external side of plasma membrane,GO:0042571~immunoglobulin complex, circulating,GO:0070062~extracellular exosome,GO:0072562~blood microparticle,	GO:0003823~antigen binding,GO:0004252~serine-type endopeptidase activity,GO:0005515~protein binding,GO:0034987~immunoglobulin receptor binding,				0.126009		-0.426794	0.552938		0.114429	0.91151		0.541224	0.456361		1.60603	0.0280741		16.6894	14.4358	17.7499	16.42	15.8322	15.441	15.8143	16.3413	15.7815	16.1714	16.3794	16.3767	16.5584	18.0409	17.4965	16.9716
A0A286YFJ8;P01861	IGHG4	Ig gamma-4 chain C region	GO:0006508~proteolysis,GO:0006910~phagocytosis, recognition,GO:0006911~phagocytosis, engulfment,GO:0006956~complement activation,GO:0006958~complement activation, classical pathway,GO:0038096~Fc-gamma receptor signaling pathway involved in phagocytosis,GO:0042742~defense response to bacterium,GO:0045087~innate immune response,GO:0050853~B cell receptor signaling pathway,GO:0050871~positive regula…	GO:0005576~extracellular region,GO:0005615~extracellular space,GO:0009897~external side of plasma membrane,GO:0042571~immunoglobulin complex, circulating,GO:0070062~extracellular exosome,GO:0072562~blood microparticle,	GO:0003823~antigen binding,GO:0004252~serine-type endopeptidase activity,GO:0034987~immunoglobulin receptor binding,				0.442122		0.624857	0.411402		0.693672	0.466174		0.0688148	0.949364		0.619693	0.423213		12.0466	11.3818	12.8331	9.93689	11.6031	12.4621	11.5471	12.1329	13.0937	12.208	12.2177	11.9884	12.5238	14.1988	11.9852	12.1984
A0A2R8Y484;Q08722	CD47	Leukocyte surface antigen CD47	GO:0007155~cell adhesion,GO:0007229~integrin-mediated signaling pathway,GO:0008228~opsonization,GO:0008284~positive regulation of cell proliferation,GO:0009617~response to bacterium,GO:0022409~positive regulation of cell-cell adhesion,GO:0030198~extracellular matrix organization,GO:0050729~positive regulation of inflammatory response,GO:0050766~positive regulation of phagocytosis,GO:0050870~posit…	GO:0005886~plasma membrane,GO:0005887~integral component of plasma membrane,GO:0016021~integral component of membrane,GO:0070062~extracellular exosome,	GO:0005515~protein binding,GO:0070053~thrombospondin receptor activity,				0.0329363		1.00917	0.0506382		-0.448233	0.507566		-1.4574	0.0102828		-0.0961639	0.885007		11.1688	10.7402	11.8295	11.7788	11.2467	12.1117	12.152	13.051	12.8173	12.9522	10.5981	10.7899	11.4053	11.7397	12.5864	12.5508
A0A590UJB9;A0A590UK79;A0A2R8YGX3;A0A2R8Y5V9;P67936	TPM4	Tropomyosin alpha-4 chain	GO:0001649~osteoblast differentiation,GO:0006928~movement of cell or subcellular component,GO:0006936~muscle contraction,GO:0007015~actin filament organization,GO:0030049~muscle filament sliding,	GO:0001725~stress fiber,GO:0002102~podosome,GO:0005829~cytosol,GO:0005856~cytoskeleton,GO:0005862~muscle thin filament tropomyosin,GO:0005884~actin filament,GO:0005925~focal adhesion,GO:0016020~membrane,GO:0030863~cortical cytoskeleton,GO:0031941~filamentous actin,GO:0070062~extracellular exosome,	GO:0005509~calcium ion binding,GO:0005515~protein binding,GO:0008307~structural constituent of muscle,GO:0051015~actin filament binding,				0.0295454		2.11028	0.0160871								0.465196	0.381845					10.3151				12.5067	12.0697	12.6997				12.4144	13.2058	13.0515
A0A2R8YDL0;O75443	TECTA	Alpha-tectorin	GO:0007160~cell-matrix adhesion,GO:0007605~sensory perception of sound,	GO:0005578~proteinaceous extracellular matrix,GO:0005886~plasma membrane,GO:0031225~anchored component of membrane,GO:0070062~extracellular exosome,	GO:0005201~extracellular matrix structural constituent,				0.0191497		-0.802851	0.0780652		0.645358	0.260769		1.44821	0.00543132	+	0.914323	0.0715799		14.7366	13.9165	14.2373	13.5092	13.6765	12.99	13.4048	13.3749	13.1517	13.1843	14.9432	15.2603	14.0322	14.5436	14.573	13.5175
A0A2R8YG47;A0A804HL06;A0A804HIB6	COL9A1	Collagen alpha-1(IX) chain	GO:0009887~organ morphogenesis,GO:0030198~extracellular matrix organization,	GO:0005576~extracellular region,GO:0005578~proteinaceous extracellular matrix,GO:0005594~collagen type IX trimer,GO:0005788~endoplasmic reticulum lumen,	GO:0030020~extracellular matrix structural constituent conferring tensile strength,GO:0046872~metal ion binding,
A0A3B3ISR2;B4DPQ0;P00736;F5H2D0;A0A3B3ITU4;F5H1V0;F5H6Y3;F5H3N3;F5H1N6;F5GWL0;F5H3A3;H0YFL7;Q9NZP8	C1R	Complement C1r subcomponent;Complement C1r subcomponent heavy chain;Complement C1r subcomponent light chain	GO:0006508~proteolysis,GO:0006955~immune response,GO:0006956~complement activation,GO:0006958~complement activation, classical pathway,GO:0045087~innate immune response,	GO:0005576~extracellular region,GO:0070062~extracellular exosome,GO:0072562~blood microparticle,	GO:0004252~serine-type endopeptidase activity,GO:0005509~calcium ion binding,GO:0005515~protein binding,GO:0008236~serine-type peptidase activity,				0.000142338	+	1.00814	0.00507984	+	1.70446	0.00032026	+	0.696329	0.0556086		-0.744913	0.0568667		16.6453	17.1459	17.1548	17.0651	17.6458	18.1112	17.8192	18.13	18.3347	18.0243	18.9151	18.7617	18.4448	17.0034	17.4768	17.3177
A0A4W8ZXM2;A0A0B4J1Y9;A0A075B7D8	IGHV3-72								0.864457		-0.0564088	0.933247		0.0906008	0.926604		0.14701	0.839732		0.423183	0.500342		13.0223	13.5756	10.9522	12.6014	12.5211	13.024	12.3543	12.141	12.4222	12.426	12.4496	12.9776	12.4582	13.6698	12.7249	12.3192
A0A5H1ZRQ7;A0M8Q6	IGLC7	Ig lambda-7 chain C region	GO:0006508~proteolysis,GO:0006898~receptor-mediated endocytosis,GO:0006910~phagocytosis, recognition,GO:0006911~phagocytosis, engulfment,GO:0006956~complement activation,GO:0006958~complement activation, classical pathway,GO:0038095~Fc-epsilon receptor signaling pathway,GO:0038096~Fc-gamma receptor signaling pathway involved in phagocytosis,GO:0042742~defense response to bacterium,GO:0045087~inna…	GO:0005576~extracellular region,GO:0005886~plasma membrane,GO:0009897~external side of plasma membrane,GO:0042571~immunoglobulin complex, circulating,GO:0072562~blood microparticle,	GO:0003823~antigen binding,GO:0004252~serine-type endopeptidase activity,GO:0034987~immunoglobulin receptor binding,				0.0610348		-0.21909	0.669859		0.603771	0.260769		0.822861	0.0533966		0.722249	0.09821			11.5669	11.5249	11.4089	11.1322	11.6449	11.8266	11.2449	10.9707	10.8675	12.3811	12.4467	11.4842	11.8675	12.3658	11.7769
E7EP32;A0A6Q8PG88;A0A7I2S2S9;Q9HAV0;P62879;P62873;C9JD14;B1AKQ8;C9JZN1;F6X3N5;F6UT28;F5H8J8;F5H100;C9JIS1;B3KVK2;H7C5J5;A0A6Q8PFW8;C9JXA5;F5H0S8;A0A6Q8PFE0;A0A6Q8PFV8;E9PCP0;P16520	GNB2;GNB4;GNB1;GNB3	Guanine nucleotide-binding protein subunit beta-4;Guanine nucleotide-binding protein G(I)/G(S)/G(T) subunit beta-2;Guanine nucleotide-binding protein G(I)/G(S)/G(T) subunit beta-1;Guanine nucleotide-binding protein G(I)/G(S)/G(T) subunit beta-3	GO:0006457~protein folding,GO:0007165~signal transduction,GO:0007186~G-protein coupled receptor signaling pathway,GO:0071377~cellular response to glucagon stimulus,,GO:0006457~protein folding,GO:0007165~signal transduction,GO:0021762~substantia nigra development,GO:0071377~cellular response to glucagon stimulus,,GO:0006457~protein folding,GO:0007165~signal transduction,GO:0007191~adenylate cyclas…	GO:0005615~extracellular space,GO:0005765~lysosomal membrane,GO:0005829~cytosol,GO:0005886~plasma membrane,GO:0005925~focal adhesion,GO:0016020~membrane,GO:0031982~vesicle,GO:0043209~myelin sheath,GO:0043234~protein complex,GO:0044297~cell body,GO:0048471~perinuclear region of cytoplasm,GO:0070062~extracellular exosome,,GO:0005765~lysosomal membrane,GO:0005829~cytosol,GO:0005886~plasma membrane,G…	GO:0003924~GTPase activity,GO:0004871~signal transducer activity,GO:0005246~calcium channel regulator activity,GO:0005515~protein binding,GO:0032403~protein complex binding,GO:0051020~GTPase binding,	+			0.64635		-0.648898	0.459902		-0.559203	0.569978		0.0896952	0.935577		-0.379713	0.646914			10.5409	13.0725	9.81308	10.5897	11.0642	11.3098	10.4321	9.18477	10.3789	10.7649	10.2197	10.7642	10.0386	10.5147	9.78735
A0A7I2V5R3;H9KV48;A0A7I2V2D2;E9PGN7;P05155;A0A7I2V2X2;A0A7I2V4I9;A0A087WUD9	SERPING1	Plasma protease C1 inhibitor	GO:0001869~negative regulation of complement activation, lectin pathway,GO:0002576~platelet degranulation,GO:0006958~complement activation, classical pathway,GO:0007568~aging,GO:0007597~blood coagulation, intrinsic pathway,GO:0008015~blood circulation,GO:0010951~negative regulation of endopeptidase activity,GO:0042730~fibrinolysis,GO:0045087~innate immune response,	GO:0005576~extracellular region,GO:0005615~extracellular space,GO:0031093~platelet alpha granule lumen,GO:0070062~extracellular exosome,GO:0072562~blood microparticle,	GO:0004867~serine-type endopeptidase inhibitor activity,GO:0005515~protein binding,			+	0.988586		0.133429	0.933247								-0.177595	0.886728				12.6205	11.2502				11.5384	12.9272	11.7408				14.1231	9.94085	11.6097
H7C4K3;A0A7I2V2F9;E7EUI6;P05556;A0A7I2V348;C9JPK5;H7C4N8;A0A7I2V5Z8;A0A7I2V5T3	ITGB1	Integrin beta;Integrin beta-1	GO:0000082~G1/S transition of mitotic cell cycle,GO:0001701~in utero embryonic development,GO:0001708~cell fate specification,GO:0002042~cell migration involved in sprouting angiogenesis,GO:0006968~cellular defense response,GO:0007156~homophilic cell adhesion via plasma membrane adhesion molecules,GO:0007159~leukocyte cell-cell adhesion,GO:0007160~cell-matrix adhesion,GO:0007161~calcium-independe…	GO:0001726~ruffle,GO:0005737~cytoplasm,GO:0005886~plasma membrane,GO:0005913~cell-cell adherens junction,GO:0005925~focal adhesion,GO:0008305~integrin complex,GO:0009897~external side of plasma membrane,GO:0009986~cell surface,GO:0014704~intercalated disc,GO:0016020~membrane,GO:0030027~lamellipodium,GO:0030175~filopodium,GO:0031594~neuromuscular junction,GO:0032154~cleavage furrow,GO:0032587~ruff…	GO:0001618~virus receptor activity,GO:0001968~fibronectin binding,GO:0002020~protease binding,GO:0003779~actin binding,GO:0004872~receptor activity,GO:0005178~integrin binding,GO:0005515~protein binding,GO:0015026~coreceptor activity,GO:0019960~C-X3-C chemokine binding,GO:0032403~protein complex binding,GO:0043236~laminin binding,GO:0046872~metal ion binding,GO:0046982~protein heterodimerization …	+			0.00026796	+	2.27967	1.10389e-05	+	1.24065	0.0143589		-1.03902	0.0199872		-0.752756	0.0944116		11.8408	13.0952	12.343	12.3393	14.5638	14.9636	14.7982	14.6722	14.3189	14.7887	13.2919	13.3657	14.2781	13.722	14.1213	13.9511
A0A7P0TAP4;A0A7P0Z441;A0A7P0T9S6;A0A7P0TA52;A0A7P0TBH1;A0A7P0T8D1;P01019	AGT	Angiotensinogen;Angiotensin-1;Angiotensin-2;Angiotensin-3;Angiotensin-4;Angiotensin 1-9;Angiotensin 1-7;Angiotensin 1-5;Angiotensin 1-4	GO:0001558~regulation of cell growth,GO:0001819~positive regulation of cytokine production,GO:0001822~kidney development,GO:0001974~blood vessel remodeling,GO:0002003~angiotensin maturation,GO:0002016~regulation of blood volume by renin-angiotensin,GO:0002018~renin-angiotensin regulation of aldosterone production,GO:0002019~regulation of renal output by angiotensin,GO:0002027~regulation of heart …	GO:0005576~extracellular region,GO:0005615~extracellular space,GO:0005737~cytoplasm,GO:0070062~extracellular exosome,GO:0072562~blood microparticle,	GO:0004867~serine-type endopeptidase inhibitor activity,GO:0005179~hormone activity,GO:0005515~protein binding,GO:0008083~growth factor activity,GO:0016176~superoxide-generating NADPH oxidase activator activity,GO:0017080~sodium channel regulator activity,GO:0031702~type 1 angiotensin receptor binding,GO:0031703~type 2 angiotensin receptor binding,GO:0048018~receptor agonist activity,			+	0.664907		0.305179	0.704299		0.485144	0.522434		0.179966	0.80911					12.0298	13.4922			13.0499	13.1447	13.0041				13.0041	13.1142	13.6202
A0A7P0Z4P0;A0A7P0T9X8;Q6UXY1	BAIAP2L2	Brain-specific angiogenesis inhibitor 1-associated protein 2-like protein 2	GO:0007009~plasma membrane organization,GO:0008286~insulin receptor signaling pathway,GO:0030838~positive regulation of actin filament polymerization,GO:0051017~actin filament bundle assembly,GO:0051764~actin crosslink formation,GO:0061024~membrane organization,GO:2000251~positive regulation of actin cytoskeleton reorganization,	GO:0005829~cytosol,GO:0005886~plasma membrane,GO:0012506~vesicle membrane,GO:0015629~actin cytoskeleton,GO:0030659~cytoplasmic vesicle membrane,GO:0044291~cell-cell contact zone,GO:0071439~clathrin complex,	GO:0005543~phospholipid binding,GO:0008093~cytoskeletal adaptor activity,				0.452012		-0.365719	0.58184		-0.429291	0.509268		-0.063572	0.930587					15.6116	15.7122			15.5052	14.9684	15.415				14.9802	15.7044	15.0134
H3BTN5;A0A804F6T5;A0A804F729;P14618;H3BQ34;H3BR70;B4DNK4;H3BT25;H3BUW1;H3BTJ2	PKM	Pyruvate kinase;Pyruvate kinase PKM	GO:0001666~response to hypoxia,GO:0001889~liver development,GO:0006754~ATP biosynthetic process,GO:0007584~response to nutrient,GO:0009629~response to gravity,GO:0012501~programmed cell death,GO:0014870~response to muscle inactivity,GO:0031100~organ regeneration,GO:0032868~response to insulin,GO:0042866~pyruvate biosynthetic process,GO:0043403~skeletal muscle tissue regeneration,GO:0061621~canoni…	GO:0005634~nucleus,GO:0005737~cytoplasm,GO:0005739~mitochondrion,GO:0005829~cytosol,GO:0005886~plasma membrane,GO:0005913~cell-cell adherens junction,GO:0005929~cilium,GO:0031012~extracellular matrix,GO:0031982~vesicle,GO:0043209~myelin sheath,GO:0070062~extracellular exosome,GO:1903561~extracellular vesicle,	GO:0000287~magnesium ion binding,GO:0004743~pyruvate kinase activity,GO:0005515~protein binding,GO:0005524~ATP binding,GO:0016301~kinase activity,GO:0023026~MHC class II protein complex binding,GO:0030955~potassium ion binding,GO:0043531~ADP binding,GO:0044822~poly(A) RNA binding,GO:0098641~cadherin binding involved in cell-cell adhesion,	+			0.516853		0.0736114	0.913789		-0.00884949	0.986173		-0.0824609	0.929252		0.741833	0.230553		13.796	11.9606	12.7558	11.0504	12.5931	12.4036	12.6956	12.2459	12.3891	12.4584	12.0076	11.677	13.4609	12.7148	13.5715	13.3321
A1L4H1;M0QZ17	SSC5D	Soluble scavenger receptor cysteine-rich domain-containing protein SSC5D	GO:0006898~receptor-mediated endocytosis,GO:0007275~multicellular organism development,GO:0042494~detection of bacterial lipoprotein,GO:0045087~innate immune response,GO:0050829~defense response to Gram-negative bacterium,GO:0050830~defense response to Gram-positive bacterium,GO:2000483~negative regulation of interleukin-8 secretion,	GO:0005615~extracellular space,GO:0005622~intracellular,GO:0005737~cytoplasm,GO:0016020~membrane,GO:0031012~extracellular matrix,	GO:0001968~fibronectin binding,GO:0005044~scavenger receptor activity,GO:0005515~protein binding,GO:0043236~laminin binding,GO:0050840~extracellular matrix binding,				0.00329205	+	-1.43556	0.00153921	+	-1.58471	0.00392247	+	-0.149149	0.786293		-0.247939	0.598564		15.9277	14.8106	15.3673	14.1337	14.0799	13.6163	13.6069	13.7083	13.3428	13.3914	13.5026	13.3855	13.5373	13.3353	13.5024	13.2912
B0YIW2;P02656	APOC3	Apolipoprotein C-III	GO:0001523~retinoid metabolic process,GO:0006641~triglyceride metabolic process,GO:0006869~lipid transport,GO:0007186~G-protein coupled receptor signaling pathway,GO:0010897~negative regulation of triglyceride catabolic process,GO:0010903~negative regulation of very-low-density lipoprotein particle remodeling,GO:0010916~negative regulation of very-low-density lipoprotein particle clearance,GO:001…	GO:0005576~extracellular region,GO:0005615~extracellular space,GO:0005769~early endosome,GO:0034361~very-low-density lipoprotein particle,GO:0034363~intermediate-density lipoprotein particle,GO:0034366~spherical high-density lipoprotein particle,GO:0042627~chylomicron,GO:0070062~extracellular exosome,	GO:0005543~phospholipid binding,GO:0008289~lipid binding,GO:0015485~cholesterol binding,GO:0030234~enzyme regulator activity,GO:0055102~lipase inhibitor activity,GO:0070653~high-density lipoprotein particle receptor binding,			+	0.000308071	+	-4.41824	5.58633e-06	+	-5.30669	8.99647e-06	+	-0.888451	0.271628		-0.12959	0.885007		20.052	19.5958	19.6852	19.4512	17.0408	14.4785	13.8147	15.5929	14.8745	15.8654	13.6121	14.9386	14.6174	16.3565	14.3354	14.7528
B1AH78;P15153;A0A3B3IRV0;F8WET9;B1AH79;A0A494C1M1;Q5JYX0;B1AH77;G3V4H1;A0A494BZX6;A0A590UJK8;G3V476;B1AH80;P84095;P63000;P60763;P17081;Q9H4E5	RAC2;RHOQ;CDC42;RHOJ;RHOG;RAC1;RAC3	Ras-related C3 botulinum toxin substrate 2;Rho-related GTP-binding protein RhoG;Ras-related C3 botulinum toxin substrate 1;Ras-related C3 botulinum toxin substrate 3;Rho-related GTP-binding protein RhoQ;Rho-related GTP-binding protein RhoJ	GO:0006935~chemotaxis,GO:0007015~actin filament organization,GO:0007165~signal transduction,GO:0007186~G-protein coupled receptor signaling pathway,GO:0007264~small GTPase mediated signal transduction,GO:0008284~positive regulation of cell proliferation,GO:0010310~regulation of hydrogen peroxide metabolic process,GO:0010592~positive regulation of lamellipodium assembly,GO:0010810~regulation of ce…	GO:0005622~intracellular,GO:0005635~nuclear envelope,GO:0005737~cytoplasm,GO:0005829~cytosol,GO:0005884~actin filament,GO:0005886~plasma membrane,GO:0005925~focal adhesion,GO:0016020~membrane,GO:0030027~lamellipodium,GO:0030670~phagocytic vesicle membrane,GO:0070062~extracellular exosome,,GO:0005622~intracellular,GO:0005829~cytosol,GO:0005884~actin filament,GO:0005886~plasma membrane,GO:0030660~G…	GO:0003924~GTPase activity,GO:0005525~GTP binding,GO:0019887~protein kinase regulator activity,	+
B1AM21;P50148	GNAQ	Guanine nucleotide-binding protein G(q) subunit alpha	GO:0001501~skeletal system development,GO:0001508~action potential,GO:0006469~negative regulation of protein kinase activity,GO:0007186~G-protein coupled receptor signaling pathway,GO:0007189~adenylate cyclase-activating G-protein coupled receptor signaling pathway,GO:0007202~activation of phospholipase C activity,GO:0007213~G-protein coupled acetylcholine receptor signaling pathway,GO:0007215~gl…	GO:0001750~photoreceptor outer segment,GO:0005737~cytoplasm,GO:0005765~lysosomal membrane,GO:0005886~plasma membrane,GO:0016020~membrane,GO:0030425~dendrite,GO:0031965~nuclear membrane,GO:0044297~cell body,GO:0070062~extracellular exosome,	GO:0003924~GTPase activity,GO:0004871~signal transducer activity,GO:0005096~GTPase activator activity,GO:0005515~protein binding,GO:0005525~GTP binding,GO:0019001~guanyl nucleotide binding,GO:0031683~G-protein beta/gamma-subunit complex binding,GO:0031826~type 2A serotonin receptor binding,GO:0046872~metal ion binding,				0.191247											0.75906	0.205944									8.62505	9.21937	9.80868				10.3923	9.8041	9.73384
B4DSN5;P18031	PTPN1	Tyrosine-protein phosphatase non-receptor type;Tyrosine-protein phosphatase non-receptor type 1	GO:0006470~protein dephosphorylation,GO:0006987~activation of signaling protein activity involved in unfolded protein response,GO:0007257~activation of JUN kinase activity,GO:0008286~insulin receptor signaling pathway,GO:0009966~regulation of signal transduction,GO:0009968~negative regulation of signal transduction,GO:0030100~regulation of endocytosis,GO:0030948~negative regulation of vascular en…	GO:0005769~early endosome,GO:0005783~endoplasmic reticulum,GO:0005829~cytosol,GO:0005886~plasma membrane,GO:0005913~cell-cell adherens junction,GO:0016021~integral component of membrane,GO:0031410~cytoplasmic vesicle,GO:0097443~sorting endosome,GO:0098554~cytoplasmic side of endoplasmic reticulum membrane,	GO:0004725~protein tyrosine phosphatase activity,GO:0005158~insulin receptor binding,GO:0005515~protein binding,GO:0008270~zinc ion binding,GO:0019899~enzyme binding,GO:0019901~protein kinase binding,GO:0030971~receptor tyrosine kinase binding,GO:0044822~poly(A) RNA binding,GO:0046875~ephrin receptor binding,GO:0051721~protein phosphatase 2A binding,GO:0098641~cadherin binding involved in cell-ce…				0.0419945		-1.18179	0.0356043		0.0378334	0.965252		1.21963	0.026737		1.0935	0.0568667			11.5553	12.028	12.1777	10.0264	10.5176	10.2102	11.3853	11.282	11.0096	12.3931	12.4349	11.0465	11.7465	12.2667	11.4829
J3QS39;J3QTR3;F5H6Q2;F5GYU3;F5H2Z3;F5H265;B4DV12;F5H388;F5H747;F5GXK7;J3QKN0;Q5PY61;Q96C32;P62987;P62979;P0CG47;P0CG48;J3QSA3;F5GZ39;M0R1V7;M0R1M6;M0R2S1;A0A2R8Y422	UBB;RPS27A;UBC;UBA52	Ubiquitin-60S ribosomal protein L40;Ubiquitin;60S ribosomal protein L40;Ubiquitin-40S ribosomal protein S27a;Ubiquitin;40S ribosomal protein S27a;Polyubiquitin-B;Ubiquitin;Polyubiquitin-C;Ubiquitin	GO:0000086~G2/M transition of mitotic cell cycle,GO:0000122~negative regulation of transcription from RNA polymerase II promoter,GO:0000165~MAPK cascade,GO:0000187~activation of MAPK activity,GO:0000209~protein polyubiquitination,GO:0000715~nucleotide-excision repair, DNA damage recognition,GO:0000717~nucleotide-excision repair, DNA duplex unwinding,GO:0002223~stimulatory C-type lectin receptor s…	GO:0005615~extracellular space,GO:0005634~nucleus,GO:0005654~nucleoplasm,GO:0005737~cytoplasm,GO:0005739~mitochondrion,GO:0005829~cytosol,GO:0005886~plasma membrane,GO:0010008~endosome membrane,GO:0030666~endocytic vesicle membrane,GO:0043005~neuron projection,GO:0043025~neuronal cell body,GO:0070062~extracellular exosome,,GO:0005615~extracellular space,GO:0005634~nucleus,GO:0005654~nucleoplasm,G…	GO:0005515~protein binding,				0.779139		0.243368	0.72197		0.0413527	0.965252		-0.202015	0.738806					13.3145	12.2151			12.8905	13.1148	13.0192				12.6885	12.6957	13.0343
E7ETN3;B4E1Z4;P00751;A0A0G2JH38;H7C5H1	CFB	Complement factor B;Complement factor B Ba fragment;Complement factor B Bb fragment	GO:0006508~proteolysis,GO:0006956~complement activation,GO:0006957~complement activation, alternative pathway,GO:0030449~regulation of complement activation,	GO:0005576~extracellular region,GO:0005615~extracellular space,GO:0005886~plasma membrane,GO:0070062~extracellular exosome,GO:0072562~blood microparticle,	GO:0001848~complement binding,GO:0004252~serine-type endopeptidase activity,			+	0.126009		1.04764	0.0506382		0.383634	0.558541		-0.664006	0.209573		-0.0321504	0.954085			12.119	12.9382	12.3394	13.1019	13.3827	13.3072	13.7011	13.7911	13.795	13.134	12.436	12.9775	14.6866	13.0547	12.7017
H7C298;B6ZDN3;M0R2J8	DCDC1		GO:0035556~intracellular signal transduction,	GO:0005622~intracellular,GO:0005737~cytoplasm,					0.117747		-0.433627	0.766443		2.29552	0.0916366		2.72915	0.00833474	+					12.8983			12.3394	12.195	12.8597				16.0063	15.9464	13.6288
B7ZKJ8;Q14624;H7C0L5;CON__Q3T052	ITIH4	Inter-alpha-trypsin inhibitor heavy chain H4;70 kDa inter-alpha-trypsin inhibitor heavy chain H4;35 kDa inter-alpha-trypsin inhibitor heavy chain H4	GO:0002576~platelet degranulation,GO:0006953~acute-phase response,GO:0010951~negative regulation of endopeptidase activity,GO:0030212~hyaluronan metabolic process,GO:0034097~response to cytokine,	GO:0005576~extracellular region,GO:0005886~plasma membrane,GO:0031089~platelet dense granule lumen,GO:0070062~extracellular exosome,GO:0072562~blood microparticle,	GO:0004866~endopeptidase inhibitor activity,GO:0004867~serine-type endopeptidase inhibitor activity,GO:0005515~protein binding,			+	0.511885		0.462084	0.447083		0.142637	0.88309		-0.319447	0.62386		0.33697	0.589936		13.7729	12.3029	14.4741	13.472	13.7634	13.6576	13.9069	14.0763	14.1209	14.2803	13.7373	13.7332	13.4738	15.6177	13.7973	13.4986
C9JBE7	WDR53								0.167513		-0.205026	0.866894								1.89538	0.0456506				12.2204	10.4041				11.385	10.86	11.0767				14.195	12.8225	11.9903
C9JF17;P05090;F8WBT9;C9JX71	APOD	Apolipoprotein D	GO:0000302~response to reactive oxygen species,GO:0001525~angiogenesis,GO:0006006~glucose metabolic process,GO:0006629~lipid metabolic process,GO:0006869~lipid transport,GO:0007420~brain development,GO:0007568~aging,GO:0010642~negative regulation of platelet-derived growth factor receptor signaling pathway,GO:0014012~peripheral nervous system axon regeneration,GO:0042246~tissue regeneration,GO:00…	GO:0005576~extracellular region,GO:0005615~extracellular space,GO:0005783~endoplasmic reticulum,GO:0022626~cytosolic ribosome,GO:0030425~dendrite,GO:0043025~neuronal cell body,GO:0048471~perinuclear region of cytoplasm,GO:0070062~extracellular exosome,	GO:0005215~transporter activity,GO:0005319~lipid transporter activity,GO:0005515~protein binding,GO:0008289~lipid binding,GO:0015485~cholesterol binding,GO:0036094~small molecule binding,			+	0.00976408	+	-1.62282	0.00153921	+	-1.5501	0.00944238	+	0.0727283	0.91944		0.087847	0.885007		17.5869	16.1069	17.7131	15.9833	15.1217	14.9583	15.0406	15.6893	15.1246	15.414	15.3604	15.2764	15.2557	15.296	15.5719	15.0699
C9JG08	C2orf16			GO:0005634~nucleus,GO:0070062~extracellular exosome,					0.0272959		-1.17065	0.0506382								0.694798	0.17458				12.4026	13.0663				11.4808	11.4952	11.7155				12.2991	12.4051	12.0717
C9JSW8;Q96ER9	CCDC51	Coiled-coil domain-containing protein 51		GO:0005654~nucleoplasm,GO:0005739~mitochondrion,GO:0016021~integral component of membrane,					0.0883773		-1.23209	0.0985531		0.439227	0.566869		1.67132	0.0173887					14.988	14.1507			13.4485	13.3126	13.2507				15.4891	15.4868	14.0498
C9JV37;E9PIT3;P00734	F2	Prothrombin;Activation peptide fragment 1;Activation peptide fragment 2;Thrombin light chain;Thrombin heavy chain	GO:0001934~positive regulation of protein phosphorylation,GO:0006465~signal peptide processing,GO:0006508~proteolysis,GO:0006888~ER to Golgi vesicle-mediated transport,GO:0006953~acute-phase response,GO:0007166~cell surface receptor signaling pathway,GO:0007275~multicellular organism development,GO:0007596~blood coagulation,GO:0007597~blood coagulation, intrinsic pathway,GO:0008284~positive regul…	GO:0005576~extracellular region,GO:0005615~extracellular space,GO:0005788~endoplasmic reticulum lumen,GO:0005796~Golgi lumen,GO:0005886~plasma membrane,GO:0070062~extracellular exosome,GO:0072562~blood microparticle,	GO:0004252~serine-type endopeptidase activity,GO:0005102~receptor binding,GO:0005509~calcium ion binding,GO:0005515~protein binding,GO:0008083~growth factor activity,GO:0070053~thrombospondin receptor activity,			+	0.121124		-0.655354	0.389304		-0.746876	0.326979		-0.0915224	0.883672						12.4428			11.6098	12.0043	11.7481				11.7592	11.4899	11.8388
C9JV77;P02765	AHSG	Alpha-2-HS-glycoprotein;Alpha-2-HS-glycoprotein chain A;Alpha-2-HS-glycoprotein chain B	GO:0001501~skeletal system development,GO:0001503~ossification,GO:0002576~platelet degranulation,GO:0006907~pinocytosis,GO:0006953~acute-phase response,GO:0010951~negative regulation of endopeptidase activity,GO:0030500~regulation of bone mineralization,GO:0030502~negative regulation of bone mineralization,GO:0042326~negative regulation of phosphorylation,GO:0046627~negative regulation of insulin…	GO:0005576~extracellular region,GO:0005615~extracellular space,GO:0031012~extracellular matrix,GO:0031093~platelet alpha granule lumen,GO:0070062~extracellular exosome,GO:0072562~blood microparticle,	GO:0004866~endopeptidase inhibitor activity,GO:0004869~cysteine-type endopeptidase inhibitor activity,GO:0019210~kinase inhibitor activity,			+	0.0210441		0.91504	0.110915		-0.381397	0.603997		-1.29644	0.0386133		0.889485	0.147895		13.6956	12.2019	13.8479	13.0266	13.8463	13.0543	13.9956	14.7413	14.1968	14.8138	12.3618	12.3209	13.752	15.4007	14.7737	14.8181
D6RF35;P02774;D6RBJ7;D6RF20;CON__Q3MHN5;CON__ENSEMBL:ENSBTAP00000018229	GC	Vitamin D-binding protein	GO:0042359~vitamin D metabolic process,GO:0051180~vitamin transport,	GO:0005576~extracellular region,GO:0005615~extracellular space,GO:0005829~cytosol,GO:0043202~lysosomal lumen,GO:0070062~extracellular exosome,GO:0072562~blood microparticle,	GO:0003779~actin binding,GO:0005499~vitamin D binding,GO:0051183~vitamin transporter activity,GO:1902118~calcidiol binding,			+	0.0173721		1.81534	0.0122375		0.305293	0.753531		-1.51005	0.0467863		0.838905	0.245407		14.3961	13.6091	14.9957	13.4331	15.7083	15.8214	16.0661	16.1209	15.6777	16.1487	13.3818	13.7101	16.1495	18.0194	16.3707	15.8981
S6AU73;D9J307;A0A140T9S9;A0A140T9G0;A0A1W2PRZ0;A0A1W2PR11;A0A140T937;A0A140T9W2;Q5SS57;Q5QT33;Q53YP1;O78179;A0A140T9U0;A0A140T962;A0A140T9M0;A0A140T9J9;A0A140T912;A0A140T9B3;A0A140T930;P01889;A0A140T9X6;A0A140T9W7;A0A140T9W3;A0A140T9D9;A0A140T9C2;A0A140T939;A0A140T9H3;A0A140T9A9;A0A140T951;A0A1W2PS56;A0A1W2PRX1;A0A1W2PP77;A0A1W2PNZ7;Q31611;A0A0G2JNX1;A0A0G2JI36;A0A140T9V0;A0A140T8X0;Q8MH48;A0A1W2…	HLA-B;HLA-C	HLA class I histocompatibility antigen, B-7 alpha chain	GO:0001916~positive regulation of T cell mediated cytotoxicity,GO:0002474~antigen processing and presentation of peptide antigen via MHC class I,GO:0002479~antigen processing and presentation of exogenous peptide antigen via MHC class I, TAP-dependent,GO:0002480~antigen processing and presentation of exogenous peptide antigen via MHC class I, TAP-independent,GO:0002486~antigen processing and pres…	GO:0000139~Golgi membrane,GO:0005783~endoplasmic reticulum,GO:0005794~Golgi apparatus,GO:0005886~plasma membrane,GO:0005887~integral component of plasma membrane,GO:0009986~cell surface,GO:0012507~ER to Golgi transport vesicle membrane,GO:0016020~membrane,GO:0016021~integral component of membrane,GO:0030670~phagocytic vesicle membrane,GO:0031901~early endosome membrane,GO:0042612~MHC class I prot…	GO:0003823~antigen binding,GO:0005102~receptor binding,GO:0042605~peptide antigen binding,GO:0046977~TAP binding,GO:0051087~chaperone binding,				0.182157		-1.9801	0.0769204								1.41122	0.0765487					11.0688				8.4303	8.53474	10.3011				10.4548	10.7694	10.2756
Q5JW28;E5RJN7;E7EVI1;E7EPX0;Q5JW30;E7EVJ4;Q9NUL3;O95793	STAU1;STAU2	Double-stranded RNA-binding protein Staufen homolog 2;Double-stranded RNA-binding protein Staufen homolog 1	GO:0034599~cellular response to oxidative stress,GO:0045070~positive regulation of viral genome replication,GO:0046726~positive regulation by virus of viral protein levels in host cell,GO:1900273~positive regulation of long-term synaptic potentiation,,GO:0006810~transport,	GO:0005737~cytoplasm,GO:0005783~endoplasmic reticulum,GO:0005791~rough endoplasmic reticulum,GO:0005875~microtubule associated complex,GO:0005886~plasma membrane,GO:0010494~cytoplasmic stress granule,GO:0016020~membrane,GO:0030425~dendrite,GO:0036464~cytoplasmic ribonucleoprotein granule,GO:0043025~neuronal cell body,GO:0044297~cell body,GO:0070062~extracellular exosome,,GO:0005730~nucleolus,GO:0…	GO:0003725~double-stranded RNA binding,GO:0005515~protein binding,GO:0008157~protein phosphatase 1 binding,GO:0044822~poly(A) RNA binding,
J3QS93;E7EQM8;P43146	DCC	Netrin receptor DCC	GO:0001764~neuron migration,GO:0006915~apoptotic process,GO:0007409~axonogenesis,GO:0007411~axon guidance,GO:0010977~negative regulation of neuron projection development,GO:0021965~spinal cord ventral commissure morphogenesis,GO:0033563~dorsal/ventral axon guidance,GO:0033564~anterior/posterior axon guidance,GO:0038007~netrin-activated signaling pathway,GO:0048671~negative regulation of collatera…	GO:0005829~cytosol,GO:0005886~plasma membrane,GO:0016021~integral component of membrane,GO:0030424~axon,	GO:0004888~transmembrane signaling receptor activity,GO:0005042~netrin receptor activity,GO:0005515~protein binding,				0.429859		0.214891	0.870109								1.10985	0.22109				11.0887	9.71809				10.9162	9.97943	10.9592				13.2108	11.4191	10.5546
E9PLT1;E7EU05;P16671	CD36	Platelet glycoprotein 4	GO:0000122~negative regulation of transcription from RNA polymerase II promoter,GO:0001954~positive regulation of cell-matrix adhesion,GO:0002479~antigen processing and presentation of exogenous peptide antigen via MHC class I, TAP-dependent,GO:0002576~platelet degranulation,GO:0002755~MyD88-dependent toll-like receptor signaling pathway,GO:0006629~lipid metabolic process,GO:0006898~receptor-medi…	GO:0005581~collagen trimer,GO:0005615~extracellular space,GO:0005794~Golgi apparatus,GO:0005886~plasma membrane,GO:0005887~integral component of plasma membrane,GO:0009897~external side of plasma membrane,GO:0009986~cell surface,GO:0016020~membrane,GO:0016021~integral component of membrane,GO:0016324~apical plasma membrane,GO:0030666~endocytic vesicle membrane,GO:0031092~platelet alpha granule me…	GO:0005041~low-density lipoprotein receptor activity,GO:0005515~protein binding,GO:0008035~high-density lipoprotein particle binding,GO:0008289~lipid binding,GO:0030169~low-density lipoprotein particle binding,GO:0050431~transforming growth factor beta binding,GO:0070053~thrombospondin receptor activity,GO:0070892~lipoteichoic acid receptor activity,GO:0071813~lipoprotein particle binding,				0.0203285		1.80549	0.0192717		0.160056	0.891414		-1.64544	0.012351		0.436517	0.497839		11.7485	10.7709			12.8668	12.9903	13.4795	13.4754	12.5892	12.99	10.9935	10.4155	12.8502	12.9861	14.0403	13.4787
E7EUT5;P04406	GAPDH	Glyceraldehyde-3-phosphate dehydrogenase	GO:0000226~microtubule cytoskeleton organization,GO:0006006~glucose metabolic process,GO:0006094~gluconeogenesis,GO:0006096~glycolytic process,GO:0016241~regulation of macroautophagy,GO:0017148~negative regulation of translation,GO:0035606~peptidyl-cysteine S-trans-nitrosylation,GO:0050821~protein stabilization,GO:0051402~neuron apoptotic process,GO:0061621~canonical glycolysis,GO:0071346~cellula…	GO:0005634~nucleus,GO:0005737~cytoplasm,GO:0005811~lipid particle,GO:0005829~cytosol,GO:0005886~plasma membrane,GO:0015630~microtubule cytoskeleton,GO:0016020~membrane,GO:0030529~intracellular ribonucleoprotein complex,GO:0031012~extracellular matrix,GO:0031965~nuclear membrane,GO:0031982~vesicle,GO:0043231~intracellular membrane-bounded organelle,GO:0048471~perinuclear region of cytoplasm,GO:007…	GO:0004365~glyceraldehyde-3-phosphate dehydrogenase (NAD+) (phosphorylating) activity,GO:0005515~protein binding,GO:0008017~microtubule binding,GO:0016620~oxidoreductase activity, acting on the aldehyde or oxo group of donors, NAD or NADP as acceptor,GO:0035605~peptidyl-cysteine S-nitrosylase activity,GO:0042802~identical protein binding,GO:0050661~NADP binding,GO:0051287~NAD binding,	+			0.120081		0.734601	0.182217		0.391	0.574177		-0.343601	0.593052		0.760186	0.196209		12.5061	11.9524	12.9833	11.5756	12.7069	13.2599	13.6069	12.5351	12.6497	13.1753	12.1461	11.8251	13.9649	13.3234	14.2232	13.7009
E7EV88;Q76LX8	ADAMTS13	A disintegrin and metalloproteinase with thrombospondin motifs 13	GO:0006508~proteolysis,GO:0007160~cell-matrix adhesion,GO:0007229~integrin-mediated signaling pathway,GO:0009100~glycoprotein metabolic process,GO:0009636~response to toxic substance,GO:0014075~response to amine,GO:0016485~protein processing,GO:0030168~platelet activation,GO:0035864~response to potassium ion,GO:0036066~protein O-linked fucosylation,GO:0043171~peptide catabolic process,GO:0071222~…	GO:0005578~proteinaceous extracellular matrix,GO:0005615~extracellular space,GO:0005788~endoplasmic reticulum lumen,GO:0009986~cell surface,	GO:0004222~metalloendopeptidase activity,GO:0005178~integrin binding,GO:0005509~calcium ion binding,GO:0005515~protein binding,GO:0008233~peptidase activity,GO:0008237~metallopeptidase activity,GO:0008270~zinc ion binding,GO:0016787~hydrolase activity,			+	0.575538		0.51345	0.654631		0.796645	0.466174		0.283195	0.709132						9.26479			10.1474	10.0689	9.11835				10.1085	9.49586	10.5799
E7EVJ3;P52848	NDST1	Bifunctional heparan sulfate N-deacetylase/N-sulfotransferase 1;Heparan sulfate N-deacetylase 1;Heparan sulfate N-sulfotransferase 1	GO:0000165~MAPK cascade,GO:0000271~polysaccharide biosynthetic process,GO:0003279~cardiac septum development,GO:0006024~glycosaminoglycan biosynthetic process,GO:0006477~protein sulfation,GO:0006954~inflammatory response,GO:0007224~smoothened signaling pathway,GO:0007585~respiratory gaseous exchange,GO:0008543~fibroblast growth factor receptor signaling pathway,GO:0015012~heparan sulfate proteogl…	GO:0000139~Golgi membrane,GO:0016021~integral component of membrane,	GO:0005515~protein binding,GO:0015016~[heparan sulfate]-glucosamine N-sulfotransferase activity,GO:0016787~hydrolase activity,GO:0050119~N-acetylglucosamine deacetylase activity,				0.259366		1.00317	0.520091								1.56149	0.128361					11.2537				12.4914	11.643	12.6361				15.4728	13.2956	12.6866
E9PAQ1;P27918	CFP	Properdin	GO:0006955~immune response,GO:0006956~complement activation,GO:0006957~complement activation, alternative pathway,GO:0030449~regulation of complement activation,GO:0036066~protein O-linked fucosylation,GO:0042742~defense response to bacterium,	GO:0005576~extracellular region,GO:0005615~extracellular space,GO:0005788~endoplasmic reticulum lumen,GO:0031012~extracellular matrix,				+	0.126009		-0.454382	0.552938								-0.675571	0.236584				12.5265	11.4563				11.3895	11.8642	11.3573				11.1454	10.7935	10.6455
E9PC84;P24821;F5H7V9;J3QSU6	TNC	Tenascin	GO:0001649~osteoblast differentiation,GO:0007155~cell adhesion,GO:0007162~negative regulation of cell adhesion,GO:0007528~neuromuscular junction development,GO:0008284~positive regulation of cell proliferation,GO:0009611~response to wounding,GO:0009612~response to mechanical stimulus,GO:0010628~positive regulation of gene expression,GO:0014012~peripheral nervous system axon regeneration,GO:003019…	GO:0005576~extracellular region,GO:0005604~basement membrane,GO:0005614~interstitial matrix,GO:0005615~extracellular space,GO:0005925~focal adhesion,GO:0016020~membrane,GO:0031012~extracellular matrix,	GO:0045545~syndecan binding,				0.175114		0.179347	0.704299		0.537185	0.310102		0.357838	0.446109		-0.49092	0.243644		14.1606	12.7759	12.9892	13.0728	13.1304	13.2541	13.1166	13.602	13.7502	13.7208	13.9215	14.0236	13.4154	13.1591	12.805	12.8502
E9PFZ2;P00450;H7C5R1;CON__ENSEMBL:ENSBTAP00000031900;D6RE86;H7C5N5	CP	Ceruloplasmin	GO:0006825~copper ion transport,GO:0006879~cellular iron ion homeostasis,GO:0055114~oxidation-reduction process,	GO:0005576~extracellular region,GO:0005615~extracellular space,GO:0005623~cell,GO:0005765~lysosomal membrane,GO:0070062~extracellular exosome,GO:0072562~blood microparticle,	GO:0004322~ferroxidase activity,GO:0005507~copper ion binding,GO:0051087~chaperone binding,			+	0.127063		0.358986	0.28646		-0.145525	0.749255		-0.504511	0.153413		-0.00979005	0.975171		15.0169	14.9837	15.0772	15.1058	15.2851	15.32	15.5641	15.568	15.1738	15.5183	14.6811	14.8902	15.1298	16.0849	15.0916	15.0087
E9PRJ3;K4DIA7;E9PMR4;P48509	CD151	Tetraspanin;CD151 antigen	GO:0007155~cell adhesion,GO:0007166~cell surface receptor signaling pathway,GO:0016477~cell migration,GO:0031581~hemidesmosome assembly,GO:0042098~T cell proliferation,	GO:0005604~basement membrane,GO:0005829~cytosol,GO:0005886~plasma membrane,GO:0005887~integral component of plasma membrane,GO:0005925~focal adhesion,GO:0016020~membrane,GO:0016021~integral component of membrane,	GO:0005178~integrin binding,GO:0005515~protein binding,				0.00503913		2.41627	0.000701647	+	0.847509	0.2509		-1.56876	0.00543132	+	-1.04458	0.0611086			9.42671		10.22	12.3546	12.3888	12.4831	12.6802	11.4617	12.0693	10.5167	10.0214	11.4744	10.8078	11.5635	11.2137
E9PP50;P23528;E9PLJ3;E9PS23;E9PQB7;G3V1A4;E9PK25;Q9Y281	CFL1	Cofilin-1	GO:0006606~protein import into nucleus,GO:0007010~cytoskeleton organization,GO:0007266~Rho protein signal transduction,GO:0009615~response to virus,GO:0022604~regulation of cell morphogenesis,GO:0030030~cell projection organization,GO:0030036~actin cytoskeleton organization,GO:0030042~actin filament depolymerization,GO:0043066~negative regulation of apoptotic process,GO:0044794~positive regulatio…	GO:0005615~extracellular space,GO:0005634~nucleus,GO:0005737~cytoplasm,GO:0005925~focal adhesion,GO:0015629~actin cytoskeleton,GO:0016020~membrane,GO:0016363~nuclear matrix,GO:0031012~extracellular matrix,GO:0031258~lamellipodium membrane,GO:0031982~vesicle,GO:0032587~ruffle membrane,GO:0070062~extracellular exosome,	GO:0005515~protein binding,GO:0051015~actin filament binding,GO:1902936~phosphatidylinositol bisphosphate binding,	+			0.429859		1.53936	0.166025		0.815483	0.504672		-0.723878	0.476304					14.2043	12.1566			14.3922	14.6921	15.0752				13.3254	13.2279	15.4345
F5H1C3;F5H0C8;P09104	ENO2	Enolase;Gamma-enolase	GO:0006094~gluconeogenesis,GO:0006096~glycolytic process,GO:0061621~canonical glycolysis,	GO:0000015~phosphopyruvate hydratase complex,GO:0001917~photoreceptor inner segment,GO:0005615~extracellular space,GO:0005829~cytosol,GO:0005886~plasma membrane,GO:0043204~perikaryon,GO:0043209~myelin sheath,GO:0070062~extracellular exosome,	GO:0000287~magnesium ion binding,GO:0004634~phosphopyruvate hydratase activity,GO:0005515~protein binding,				0.684628		0.0494937	0.946008		-0.603158	0.504672		-0.652652	0.378931		-0.432532	0.541919			12.6563	12.8161	12.4647	11.9377	13.1611	12.3629	12.7904	13.2087	12.7103	10.5218	13.1216	12.4843	11.1915	12.7227	12.8737
F5H4Q7;F5H4P8;H0YFK8;F5H4N6;Q9Y3R0	GRIP1	Glutamate receptor-interacting protein 1	GO:0008104~protein localization,GO:0016358~dendrite development,GO:0030521~androgen receptor signaling pathway,GO:0035556~intracellular signal transduction,GO:0045598~regulation of fat cell differentiation,GO:0045893~positive regulation of transcription, DNA-templated,GO:0050994~regulation of lipid catabolic process,	GO:0005783~endoplasmic reticulum,GO:0005829~cytosol,GO:0005886~plasma membrane,GO:0016023~cytoplasmic, membrane-bounded vesicle,GO:0030054~cell junction,GO:0030425~dendrite,GO:0043005~neuron projection,GO:0045121~membrane raft,GO:0045211~postsynaptic membrane,GO:0055037~recycling endosome,	GO:0003713~transcription coactivator activity,GO:0005515~protein binding,GO:0008013~beta-catenin binding,GO:0008022~protein C-terminus binding,GO:0030159~receptor signaling complex scaffold activity,GO:0030246~carbohydrate binding,GO:0035259~glucocorticoid receptor binding,GO:0050681~androgen receptor binding,				0.00184097	+	-0.00330485	0.992589		0.507956	0.202592		0.511261	0.130563		1.14703	0.00506851	+	13.5112	13.5599	13.4638	13.6203	13.4949	13.1445	13.4191	13.8883	13.3688	13.8975	13.985	14.2361	13.9192	14.3784	15.0893	14.5799
F6VVT6;Q5R345;Q5R341;Q5R349;P16109	SELP	P-selectin	GO:0002576~platelet degranulation,GO:0002687~positive regulation of leukocyte migration,GO:0006954~inflammatory response,GO:0007155~cell adhesion,GO:0007157~heterophilic cell-cell adhesion via plasma membrane cell adhesion molecules,GO:0007159~leukocyte cell-cell adhesion,GO:0010572~positive regulation of platelet activation,GO:0014068~positive regulation of phosphatidylinositol 3-kinase signalin…	GO:0005615~extracellular space,GO:0005654~nucleoplasm,GO:0005737~cytoplasm,GO:0005886~plasma membrane,GO:0005887~integral component of plasma membrane,GO:0009897~external side of plasma membrane,GO:0016020~membrane,GO:0016021~integral component of membrane,GO:0031088~platelet dense granule membrane,GO:0031092~platelet alpha granule membrane,	GO:0001530~lipopolysaccharide binding,GO:0001948~glycoprotein binding,GO:0005515~protein binding,GO:0008201~heparin binding,GO:0030246~carbohydrate binding,GO:0033691~sialic acid binding,GO:0042806~fucose binding,GO:0043208~glycosphingolipid binding,GO:0048306~calcium-dependent protein binding,GO:0070492~oligosaccharide binding,				0.554321		0.553395	0.58184		0.620526	0.522434		0.0671308	0.937776						10.2029			10.9934	11.1905	10.085				10.7428	10.8373	10.8903
F8W8W4;Q9UHG3;C9K055;C9JGT6;C9JM55	PCYOX1	Prenylcysteine oxidase 1	GO:0030327~prenylated protein catabolic process,GO:0030328~prenylcysteine catabolic process,GO:0030329~prenylcysteine metabolic process,GO:0055114~oxidation-reduction process,GO:1902476~chloride transmembrane transport,	GO:0005764~lysosome,GO:0005774~vacuolar membrane,GO:0005886~plasma membrane,GO:0034361~very-low-density lipoprotein particle,GO:0070062~extracellular exosome,	GO:0001735~prenylcysteine oxidase activity,GO:0008555~chloride-transporting ATPase activity,				0.0888694		-0.901625	0.117341		-0.927394	0.131021		-0.0257686	0.968829					16.1433	15.4013			14.9996	14.5739	15.0385				14.5967	14.9848	14.9532
H0Y612;Q9UPN9	TRIM33	E3 ubiquitin-protein ligase TRIM33	GO:0000122~negative regulation of transcription from RNA polymerase II promoter,GO:0006351~transcription, DNA-templated,GO:0016567~protein ubiquitination,GO:0017015~regulation of transforming growth factor beta receptor signaling pathway,GO:0030514~negative regulation of BMP signaling pathway,GO:0045892~negative regulation of transcription, DNA-templated,	GO:0005622~intracellular,GO:0005634~nucleus,GO:0005654~nucleoplasm,GO:0043231~intracellular membrane-bounded organelle,	GO:0003677~DNA binding,GO:0004842~ubiquitin-protein transferase activity,GO:0005515~protein binding,GO:0008270~zinc ion binding,GO:0016874~ligase activity,GO:0070410~co-SMAD binding,GO:0070412~R-SMAD binding,				0.222272		-0.337395	0.58184		-0.21391	0.781633		0.123485	0.86398		-0.778112	0.179443		13.2861	12.1995	14.1364	12.376	12.6474	13.0719	12.514	12.5703	12.5933	12.5759	13.5843	12.3066	12.466	12.0512	11.1719	12.429
H3BNE1;H3BR18;H3BM38;H3BPJ0;O00161	SNAP23	Synaptosomal-associated protein;Synaptosomal-associated protein 23	GO:0002553~histamine secretion by mast cell,GO:0006892~post-Golgi vesicle-mediated transport,GO:0006903~vesicle targeting,GO:0015031~protein transport,GO:0016082~synaptic vesicle priming,GO:0031629~synaptic vesicle fusion to presynaptic active zone membrane,GO:0061025~membrane fusion,	GO:0005654~nucleoplasm,GO:0005737~cytoplasm,GO:0005886~plasma membrane,GO:0005911~cell-cell junction,GO:0005925~focal adhesion,GO:0016021~integral component of membrane,GO:0031201~SNARE complex,GO:0042581~specific granule,GO:0042582~azurophil granule,GO:0042629~mast cell granule,GO:0043005~neuron projection,GO:0070062~extracellular exosome,GO:0098793~presynapse,	GO:0005484~SNAP receptor activity,GO:0005515~protein binding,GO:0019905~syntaxin binding,
H3BPS8;H3BQN4;J3KPS3;P04075;H3BUH7;A0A087WXX2;A0A3B3IS80;P09972;P05062	ALDOA;ALDOB;ALDOC	Fructose-bisphosphate aldolase;Fructose-bisphosphate aldolase A;Fructose-bisphosphate aldolase C;Fructose-bisphosphate aldolase B	GO:0002576~platelet degranulation,GO:0006000~fructose metabolic process,GO:0006094~gluconeogenesis,GO:0006096~glycolytic process,GO:0006754~ATP biosynthetic process,GO:0006941~striated muscle contraction,GO:0007015~actin filament organization,GO:0008360~regulation of cell shape,GO:0030388~fructose 1,6-bisphosphate metabolic process,GO:0046716~muscle cell cellular homeostasis,GO:0051289~protein ho…	GO:0005576~extracellular region,GO:0005615~extracellular space,GO:0005634~nucleus,GO:0005829~cytosol,GO:0005913~cell-cell adherens junction,GO:0015629~actin cytoskeleton,GO:0016020~membrane,GO:0031093~platelet alpha granule lumen,GO:0031430~M band,GO:0031674~I band,GO:0070062~extracellular exosome,,GO:0005815~microtubule organizing center,GO:0005829~cytosol,GO:0034451~centriolar satellite,GO:0070…	GO:0003779~actin binding,GO:0004332~fructose-bisphosphate aldolase activity,GO:0005515~protein binding,GO:0008092~cytoskeletal protein binding,GO:0015631~tubulin binding,GO:0042802~identical protein binding,GO:0044822~poly(A) RNA binding,GO:0070061~fructose binding,GO:0098641~cadherin binding involved in cell-cell adhesion,	+			0.186777		0.519019	0.574966		0.661612	0.509268		0.142593	0.887895		1.41292	0.0815304			11.0598	13.2065	9.53677	12.3832	12.376	12.0693	10.9221	11.0855	11.8841	11.6514	11.6168	12.5196	12.9305	13.633	13.0354
I3L4N8;P63261;P60709;E7EVS6;A0A804GS07;A0A2R8Y793;A0A6Q8PFE4;P63267;P68133;P68032;P62736;I3L3I0;I3L1U9;A6NL76;G5E9R0;K7EM38;A0A6Q8PH58;I3L3R2;A0A2R8YGF8;J3KT65;C9JTX5;C9JUM1;C9JZR7;F8WB63;B8ZZJ2;C9JFL5;F6UVQ4;F6QUT6;A0A804HKV3;Q6S8J3;A5A3E0;A0A2R8YFE2;Q562R1;P0CG38;F8WCH0;A0A2R8YEA7;Q9BYX7;P0CG39;A0A6Q8PGD7;A0A7P0TBL1	ACTG1;ACTB;ACTG2;ACTA1;ACTC1;ACTA2	Actin, cytoplasmic 2;Actin, cytoplasmic 2, N-terminally processed;Actin, cytoplasmic 1;Actin, cytoplasmic 1, N-terminally processed;Actin, gamma-enteric smooth muscle;Actin, alpha skeletal muscle;Actin, alpha cardiac muscle 1;Actin, aortic smooth muscle	GO:0001895~retina homeostasis,GO:0006928~movement of cell or subcellular component,GO:0034329~cell junction assembly,GO:0038096~Fc-gamma receptor signaling pathway involved in phagocytosis,GO:0045214~sarcomere organization,GO:0048010~vascular endothelial growth factor receptor signaling pathway,GO:0048013~ephrin receptor signaling pathway,GO:0070527~platelet aggregation,,GO:0001895~retina homeost…	GO:0005615~extracellular space,GO:0005634~nucleus,GO:0005829~cytosol,GO:0005856~cytoskeleton,GO:0005886~plasma membrane,GO:0005925~focal adhesion,GO:0016020~membrane,GO:0030016~myofibril,GO:0031012~extracellular matrix,GO:0031941~filamentous actin,GO:0043209~myelin sheath,GO:0070062~extracellular exosome,GO:0072562~blood microparticle,GO:0097433~dense body,,GO:0000790~nuclear chromatin,GO:0005615…	GO:0005200~structural constituent of cytoskeleton,GO:0005515~protein binding,GO:0005524~ATP binding,GO:0031625~ubiquitin protein ligase binding,GO:0042802~identical protein binding,	+			0.0808417		0.975684	0.136113		0.0253304	0.977094		-0.950353	0.182968		0.846406	0.22109		15.7699	14.5448	16.5332	15.2773	16.0599	16.2621	16.6218	16.6616	16.6101	16.8265	14.4281	14.8966	17.3452	16.8255	17.7562	17.4785
J3KNB4;P49913	CAMP	Cathelicidin antimicrobial peptide;Antibacterial protein FALL-39;Antibacterial protein LL-37	GO:0001878~response to yeast,GO:0001934~positive regulation of protein phosphorylation,GO:0002227~innate immune response in mucosa,GO:0002544~chronic inflammatory response,GO:0008284~positive regulation of cell proliferation,GO:0019731~antibacterial humoral response,GO:0019732~antifungal humoral response,GO:0042742~defense response to bacterium,GO:0044130~negative regulation of growth of symbiont…	GO:0005576~extracellular region,GO:0005615~extracellular space,GO:0005618~cell wall,GO:0005622~intracellular,GO:0042581~specific granule,GO:0042995~cell projection,GO:0070062~extracellular exosome,				+	0.00898168	+	-1.1444	0.0356043		-1.5596	0.0169016		-0.415209	0.499041		-1.30823	0.0335953		15.8414	14.9491	15.0584	13.5127	14.1399	13.9314	13.8317	13.5409	13.4484	13.2837	13.4937	13.6833	12.6654	12.3898	11.9437	12.8299
J3KRP0;Q96KN2	CNDP1	Beta-Ala-His dipeptidase	GO:0006508~proteolysis,GO:0032268~regulation of cellular protein metabolic process,GO:0043171~peptide catabolic process,	GO:0005576~extracellular region,GO:0005829~cytosol,	GO:0004180~carboxypeptidase activity,GO:0008237~metallopeptidase activity,GO:0008270~zinc ion binding,GO:0016805~dipeptidase activity,GO:0070573~metallodipeptidase activity,			+	0.385867								-0.568484	0.439615									11.3786	11.0526	10.9901				9.70363	10.7005	11.3117
J3QQX6;J3QRQ1;P13598;J3QQR8;J3QRT5;J3QKR4	ICAM2	Intercellular adhesion molecule 2	GO:0002223~stimulatory C-type lectin receptor signaling pathway,GO:0007155~cell adhesion,GO:0016337~single organismal cell-cell adhesion,GO:0030198~extracellular matrix organization,GO:0050776~regulation of immune response,	GO:0001931~uropod,GO:0005886~plasma membrane,GO:0005887~integral component of plasma membrane,GO:0016020~membrane,GO:0016021~integral component of membrane,GO:0070062~extracellular exosome,	GO:0005178~integrin binding,				0.00149323		2.7359	0.000116092	+	0.936547	0.173354		-1.79935	0.00201958	+	-1.24088	0.023038			11.0873		10.3899	13.1535	13.1843	13.529	13.578	13.3545	14.0479	11.3095	11.3813	12.3348	11.9218	12.9336	11.8455
K7EPR2;K7EIL7;K7ELS1;Q86WZ6	ZNF227	Zinc finger protein 227	GO:0006351~transcription, DNA-templated,GO:0006355~regulation of transcription, DNA-templated,GO:0045892~negative regulation of transcription, DNA-templated,	GO:0005622~intracellular,GO:0005634~nucleus,	GO:0003676~nucleic acid binding,GO:0003677~DNA binding,GO:0003700~transcription factor activity, sequence-specific DNA binding,GO:0005515~protein binding,GO:0046872~metal ion binding,				0.488185		0.4549	0.694723		1.04034	0.326979		0.585435	0.428446						10.5131			11.5548	11.03	10.3191				12.325	11.4351	10.9001
K7EKF6;Q8NI99	ANGPTL6	Angiopoietin-related protein 6	GO:0001525~angiogenesis,GO:0030154~cell differentiation,	GO:0030141~secretory granule,GO:0070062~extracellular exosome,				+
K7ER74;P02655;Q6P163;V9GYJ8	APOC4-APOC2;APOC2	Apolipoprotein C-II;Proapolipoprotein C-II	GO:0006629~lipid metabolic process,GO:0006869~lipid transport,,GO:0001523~retinoid metabolic process,GO:0006629~lipid metabolic process,GO:0006869~lipid transport,GO:0010518~positive regulation of phospholipase activity,GO:0010898~positive regulation of triglyceride catabolic process,GO:0010902~positive regulation of very-low-density lipoprotein particle remodeling,GO:0010916~negative regulation …	GO:0042627~chylomicron,,GO:0005576~extracellular region,GO:0005615~extracellular space,GO:0005769~early endosome,GO:0034361~very-low-density lipoprotein particle,GO:0034362~low-density lipoprotein particle,GO:0034363~intermediate-density lipoprotein particle,GO:0034366~spherical high-density lipoprotein particle,GO:0042627~chylomicron,GO:0070062~extracellular exosome,	GO:0008047~enzyme activator activity,			+	0.00132561	+	-6.41552	1.71346e-05	+	-7.89254	2.44789e-05	+	-1.47702	0.26679		1.00157	0.440894		21.4213	20.7793	21.5173	20.7509	18.0545	13.4922	11.6716	15.7512	13.8041	15.4366	12.6711	14.0273	12.9756	17.0657	14.1302	15.9138
K7ERI9;P02654;K7EJI9;K7ELM9;K7EPF9;K7EKP1	APOC1	Apolipoprotein C-I;Truncated apolipoprotein C-I	GO:0006629~lipid metabolic process,GO:0006641~triglyceride metabolic process,GO:0008203~cholesterol metabolic process,GO:0010873~positive regulation of cholesterol esterification,GO:0010900~negative regulation of phosphatidylcholine catabolic process,GO:0010916~negative regulation of very-low-density lipoprotein particle clearance,GO:0032374~regulation of cholesterol transport,GO:0032375~negative…	GO:0005576~extracellular region,GO:0005783~endoplasmic reticulum,GO:0034361~very-low-density lipoprotein particle,GO:0034364~high-density lipoprotein particle,GO:0042627~chylomicron,GO:0070062~extracellular exosome,	GO:0004859~phospholipase inhibitor activity,GO:0005504~fatty acid binding,GO:0031210~phosphatidylcholine binding,GO:0055102~lipase inhibitor activity,GO:0060228~phosphatidylcholine-sterol O-acyltransferase activator activity,			+	0.000218783	+	-3.46806	5.58633e-06	+	-3.72752	2.44789e-05	+	-0.259465	0.719374		-0.905603	0.147851		20.1927	19.3494	20.1052	19.1728	17.4491	15.7266	16.1146	16.3976	15.5763	16.1576	15.9142	16.2831	15.7352	16.6266	14.7098	14.6577
M0R009;P04217	A1BG	Alpha-1B-glycoprotein	GO:0002576~platelet degranulation,	GO:0005576~extracellular region,GO:0005615~extracellular space,GO:0031093~platelet alpha granule lumen,GO:0070062~extracellular exosome,GO:0072562~blood microparticle,				+	0.00527185		0.673675	0.117341		0.374948	0.504672		-0.298727	0.518147		1.25324	0.0119364		11.7851	11.5145		11.3586	11.6605	11.7485	12.016	12.7396	12.7181	12.4758	11.9126	11.8548	12.0157	14.0455	13.426	12.9674
O14672	ADAM10	Disintegrin and metalloproteinase domain-containing protein 10	GO:0001701~in utero embryonic development,GO:0006468~protein phosphorylation,GO:0006509~membrane protein ectodomain proteolysis,GO:0007162~negative regulation of cell adhesion,GO:0007219~Notch signaling pathway,GO:0007220~Notch receptor processing,GO:0007229~integrin-mediated signaling pathway,GO:0007267~cell-cell signaling,GO:0008284~positive regulation of cell proliferation,GO:0010820~positive …	GO:0000139~Golgi membrane,GO:0005634~nucleus,GO:0005737~cytoplasm,GO:0005794~Golgi apparatus,GO:0005798~Golgi-associated vesicle,GO:0005886~plasma membrane,GO:0005925~focal adhesion,GO:0009986~cell surface,GO:0014069~postsynaptic density,GO:0016020~membrane,GO:0016021~integral component of membrane,GO:0043231~intracellular membrane-bounded organelle,GO:0070062~extracellular exosome,GO:0097038~per…	GO:0004175~endopeptidase activity,GO:0004222~metalloendopeptidase activity,GO:0005102~receptor binding,GO:0005178~integrin binding,GO:0005515~protein binding,GO:0008237~metallopeptidase activity,GO:0017124~SH3 domain binding,GO:0019901~protein kinase binding,GO:0042803~protein homodimerization activity,GO:0046872~metal ion binding,				0.0257704		-0.265403	0.72197		-1.68651	0.0264521		-1.42111	0.0152511		-1.31867	0.0308984		12.9991	11.8115			11.2843	11.9765	12.0191	12.8561	11.9678	12.7357	10.6509	10.2474	11.2581	10.5913	10.4642	11.4082
O14791	APOL1	Apolipoprotein L1	GO:0006869~lipid transport,GO:0006898~receptor-mediated endocytosis,GO:0008203~cholesterol metabolic process,GO:0019835~cytolysis,GO:0031640~killing of cells of other organism,GO:0042157~lipoprotein metabolic process,GO:0045087~innate immune response,GO:1902476~chloride transmembrane transport,	GO:0005576~extracellular region,GO:0005615~extracellular space,GO:0016021~integral component of membrane,GO:0031224~intrinsic component of membrane,GO:0034361~very-low-density lipoprotein particle,GO:0034364~high-density lipoprotein particle,GO:0072562~blood microparticle,	GO:0005254~chloride channel activity,GO:0005515~protein binding,GO:0008289~lipid binding,			+	0.14184		-0.949501	0.0608762		-0.410291	0.522434		0.53921	0.348077		0.823132	0.138219		13.6599	14.5232	15.0574	15.7803	14.0406	13.4816	13.2934	14.2222	13.8762	13.9202	14.3343	14.6258	14.0747	14.3144	15.2442	14.3279
O43866	CD5L	CD5 antigen-like	GO:0002376~immune system process,GO:0006898~receptor-mediated endocytosis,GO:0006915~apoptotic process,GO:0006954~inflammatory response,GO:0006968~cellular defense response,	GO:0005576~extracellular region,GO:0005615~extracellular space,GO:0005737~cytoplasm,GO:0016020~membrane,GO:0070062~extracellular exosome,GO:0072562~blood microparticle,	GO:0005044~scavenger receptor activity,			+	0.0146254		-0.721648	0.082855		0.757953	0.143645		1.4796	0.00298927	+	1.01572	0.0348221		16.8127	17.929	17.065	17.8481	16.6317	16.8133	16.6232	16.7277	16.6974	16.6589	18.3019	18.8192	17.3939	17.2593	18.1945	17.6695
U3KQK0;Q99880;Q99879;Q99877;Q93079;Q5QNW6;Q16778;P62807;P58876;P57053;P33778;P23527;P06899;O60814;Q96A08;A0A2R8Y619;Q8N257	HIST1H2BN;HIST1H2BL;HIST1H2BM;HIST1H2BH;HIST2H2BF;HIST2H2BE;HIST1H2BC;HIST1H2BD;H2BFS;HIST1H2BB;HIST1H2BO;HIST1H2BJ;HIST1H2BK;HIST1H2BA;HIST3H2BB	Histone H2B;Histone H2B type 1-L;Histone H2B type 1-M;Histone H2B type 1-N;Histone H2B type 1-H;Histone H2B type 2-F;Histone H2B type 2-E;Histone H2B type 1-C/E/F/G/I;Histone H2B type 1-D;Histone H2B type F-S;Histone H2B type 1-B;Histone H2B type 1-O;Histone H2B type 1-J;Histone H2B type 1-K;Histone H2B type 1-A;Histone H2B type 3-B	GO:0006334~nucleosome assembly,,GO:0006334~nucleosome assembly,,GO:0006334~nucleosome assembly,,GO:0006334~nucleosome assembly,,GO:0006334~nucleosome assembly,,GO:0002227~innate immune response in mucosa,GO:0006334~nucleosome assembly,GO:0019731~antibacterial humoral response,GO:0050830~defense response to Gram-positive bacterium,,GO:0002227~innate immune response in mucosa,GO:0006334~nucleosome …	GO:0000786~nucleosome,GO:0000788~nuclear nucleosome,GO:0005634~nucleus,GO:0005654~nucleoplasm,GO:0005737~cytoplasm,GO:0070062~extracellular exosome,,GO:0000786~nucleosome,GO:0000788~nuclear nucleosome,GO:0005634~nucleus,GO:0005654~nucleoplasm,GO:0005737~cytoplasm,GO:0070062~extracellular exosome,,GO:0000786~nucleosome,GO:0000788~nuclear nucleosome,GO:0005634~nucleus,GO:0005654~nucleoplasm,GO:0005…	GO:0003677~DNA binding,GO:0046982~protein heterodimerization activity,				0.150492		-1.44585	0.0709729		-1.26523	0.129148		0.180618	0.828793					15.898	14.1733			13.9148	13.2414	13.6132				13.7224	13.6889	13.9
O60832	DKC1	H/ACA ribonucleoprotein complex subunit 4	GO:0000495~box H/ACA snoRNA 3'-end processing,GO:0001522~pseudouridine synthesis,GO:0006364~rRNA processing,GO:0006396~RNA processing,GO:0007004~telomere maintenance via telomerase,GO:0008283~cell proliferation,GO:0031118~rRNA pseudouridine synthesis,GO:0031120~snRNA pseudouridine synthesis,GO:0032212~positive regulation of telomere maintenance via telomerase,GO:0051973~positive regulation of tel…	GO:0005634~nucleus,GO:0005654~nucleoplasm,GO:0005697~telomerase holoenzyme complex,GO:0005730~nucleolus,GO:0005737~cytoplasm,GO:0016021~integral component of membrane,GO:0031429~box H/ACA snoRNP complex,GO:0072589~box H/ACA scaRNP complex,GO:0090661~box H/ACA telomerase RNP complex,	GO:0003720~telomerase activity,GO:0003723~RNA binding,GO:0005515~protein binding,GO:0009982~pseudouridine synthase activity,GO:0034513~box H/ACA snoRNA binding,GO:0044822~poly(A) RNA binding,GO:0070034~telomerase RNA binding,				0.0112275		-2.86371	0.000773619	+	-3.37026	0.000302388	+	-0.50655	0.400211					14.7265	14.0853			12.3744	11.2959	10.9563				11.1066	10.985	11.0154
O75083;D6RD66	WDR1	WD repeat-containing protein 1	GO:0002446~neutrophil mediated immunity,GO:0002576~platelet degranulation,GO:0007605~sensory perception of sound,GO:0008360~regulation of cell shape,GO:0030043~actin filament fragmentation,GO:0030220~platelet formation,GO:0030834~regulation of actin filament depolymerization,GO:0030836~positive regulation of actin filament depolymerization,GO:0030865~cortical cytoskeleton organization,GO:0040011~…	GO:0002102~podosome,GO:0005576~extracellular region,GO:0005737~cytoplasm,GO:0005829~cytosol,GO:0005884~actin filament,GO:0005911~cell-cell junction,GO:0030864~cortical actin cytoskeleton,GO:0042643~actomyosin, actin portion,GO:0042995~cell projection,GO:0043209~myelin sheath,GO:0070062~extracellular exosome,	GO:0051015~actin filament binding,				0.015737		2.07893	0.0223456								0.98186	0.09821					11.0458				13.1178	13.0032	13.2532				13.6265	14.5279	14.1654
O75636	FCN3	Ficolin-3	GO:0001867~complement activation, lectin pathway,GO:0006508~proteolysis,GO:0006956~complement activation,GO:0043654~recognition of apoptotic cell,GO:0046597~negative regulation of viral entry into host cell,GO:0051607~defense response to virus,GO:1902679~negative regulation of RNA biosynthetic process,	GO:0005576~extracellular region,GO:0005581~collagen trimer,GO:0072562~blood microparticle,	GO:0003823~antigen binding,GO:0004252~serine-type endopeptidase activity,GO:0005515~protein binding,GO:0030246~carbohydrate binding,GO:0046872~metal ion binding,			+	0.000794472	+	0.0158111	0.981035		-1.56415	0.0205122		-1.57996	0.0102828		-3.25869	7.8191e-05	+	19.0553	17.7459	18.8372	17.1822	18.1152	18.2809	18.0302	18.3955	18.2847	18.2192	16.0126	16.0383	17.8721	15.1895	14.659	15.0383
O95445;Q5SRP5	APOM	Apolipoprotein M	GO:0001523~retinoid metabolic process,GO:0009749~response to glucose,GO:0033344~cholesterol efflux,GO:0034375~high-density lipoprotein particle remodeling,GO:0034380~high-density lipoprotein particle assembly,GO:0034384~high-density lipoprotein particle clearance,GO:0034445~negative regulation of plasma lipoprotein particle oxidation,GO:0042157~lipoprotein metabolic process,GO:0042632~cholesterol…	GO:0005576~extracellular region,GO:0005887~integral component of plasma membrane,GO:0034361~very-low-density lipoprotein particle,GO:0034362~low-density lipoprotein particle,GO:0034364~high-density lipoprotein particle,GO:0034365~discoidal high-density lipoprotein particle,GO:0034366~spherical high-density lipoprotein particle,GO:0070062~extracellular exosome,	GO:0005319~lipid transporter activity,GO:0005543~phospholipid binding,GO:0016209~antioxidant activity,			+	0.000101934	+	-1.51652	0.000577237	+	-2.03337	0.000218903	+	-0.516844	0.219863		-1.19287	0.0127318		16.3238	15.9698	16.4768	15.8205	15.0398	14.4546	14.9194	14.5798	14.0319	14.7616	13.8436	14.3297	14.1698	13.7601	13.608	12.9468
O95810	SDPR	Serum deprivation-response protein		GO:0005737~cytoplasm,GO:0005829~cytosol,GO:0005901~caveola,GO:0045121~membrane raft,	GO:0001786~phosphatidylserine binding,GO:0005080~protein kinase C binding,GO:0005515~protein binding,GO:0005543~phospholipid binding,				0.421262		1.29547	0.177179		0.244317	0.872885		-1.05116	0.201805		-0.462337	0.587089			11.1182		12.343	11.7983	12.7007	12.4681	13.237	14.1603	13.792	10.9746	11.1988	13.7513	12.5467	12.9616	12.1829
P00338	LDHA	L-lactate dehydrogenase A chain	GO:0001666~response to hypoxia,GO:0005975~carbohydrate metabolic process,GO:0006089~lactate metabolic process,GO:0006090~pyruvate metabolic process,GO:0006096~glycolytic process,GO:0007584~response to nutrient,GO:0009749~response to glucose,GO:0019674~NAD metabolic process,GO:0019752~carboxylic acid metabolic process,GO:0021762~substantia nigra development,GO:0042493~response to drug,GO:0042542~r…	GO:0005634~nucleus,GO:0005737~cytoplasm,GO:0005829~cytosol,GO:0005913~cell-cell adherens junction,GO:0016020~membrane,GO:0016021~integral component of membrane,GO:0070062~extracellular exosome,	GO:0004459~L-lactate dehydrogenase activity,GO:0005515~protein binding,GO:0016616~oxidoreductase activity, acting on the CH-OH group of donors, NAD or NADP as acceptor,GO:0019900~kinase binding,GO:0042802~identical protein binding,GO:0051287~NAD binding,GO:0098641~cadherin binding involved in cell-cell adhesion,	+			0.286843		0.511151	0.704299								1.24158	0.143152					10.8727				10.2403	11.5408	12.3705				12.24	13.2773	12.3592
P00488	F13A1	Coagulation factor XIII A chain	GO:0002576~platelet degranulation,GO:0007596~blood coagulation,GO:0018149~peptide cross-linking,	GO:0005576~extracellular region,GO:0031093~platelet alpha granule lumen,GO:0072562~blood microparticle,	GO:0003810~protein-glutamine gamma-glutamyltransferase activity,GO:0046872~metal ion binding,			+	0.161941		-0.69691	0.233054		-0.916145	0.202592		-0.219234	0.73978		1.03467	0.0785604			10.2778	12.7795	12.002	10.9862	10.7702	10.2219	11.0852	11.557	11.3165	10.8839	10.5283	10.8986	11.625	12.3847	12.0628
P00738;A0A0C4DGL8;J3QR68;H0Y300;J3QLC9;A0A087WU08;H3BS21;J3KRH2;J3KTC3;J3KSV1;J3QQI8;H3BMJ7	HP	Haptoglobin;Haptoglobin alpha chain;Haptoglobin beta chain	GO:0002376~immune system process,GO:0006898~receptor-mediated endocytosis,GO:0006952~defense response,GO:0006953~acute-phase response,GO:0010942~positive regulation of cell death,GO:0042542~response to hydrogen peroxide,GO:0042742~defense response to bacterium,GO:0051354~negative regulation of oxidoreductase activity,GO:0098869~cellular oxidant detoxification,GO:2000296~negative regulation of hyd…	GO:0005576~extracellular region,GO:0005615~extracellular space,GO:0031838~haptoglobin-hemoglobin complex,GO:0070062~extracellular exosome,GO:0071682~endocytic vesicle lumen,GO:0072562~blood microparticle,	GO:0004252~serine-type endopeptidase activity,GO:0005515~protein binding,GO:0016209~antioxidant activity,GO:0030492~hemoglobin binding,			+	0.000308071	+	3.4263	5.58633e-06	+	0.207743	0.810565		-3.21856	0.000106686	+	-3.10974	7.8191e-05	+	16.5833	17.3624	17.6106	17.5254	19.8982	21.7373	19.9972	20.4038	21.831	20.3131	17.2528	17.2554	17.9264	18.4578	17.3123	16.991
P00739;A0A0A0MRD9	HPR	Haptoglobin-related protein	GO:0006898~receptor-mediated endocytosis,	GO:0005576~extracellular region,GO:0034366~spherical high-density lipoprotein particle,GO:0070062~extracellular exosome,GO:0072562~blood microparticle,	GO:0004252~serine-type endopeptidase activity,GO:0030492~hemoglobin binding,			+	0.015737		-0.77263	0.0450331		0.320836	0.509268		1.09347	0.00966117	+	1.0069	0.0235233		15.5827	16.2593	16.5367	16.1963	15.3613	14.8647	15.5057	15.6902	15.1691	15.6357	16.7248	16.5931	16.0759	16.016	16.9828	16.1352
P00747	PLG	Plasminogen;Plasmin heavy chain A;Activation peptide;Angiostatin;Plasmin heavy chain A, short form;Plasmin light chain B	GO:0002576~platelet degranulation,GO:0006508~proteolysis,GO:0007596~blood coagulation,GO:0008285~negative regulation of cell proliferation,GO:0010812~negative regulation of cell-substrate adhesion,GO:0022617~extracellular matrix disassembly,GO:0042730~fibrinolysis,GO:0044267~cellular protein metabolic process,GO:0048771~tissue remodeling,GO:0051918~negative regulation of fibrinolysis,GO:0051919~p…	GO:0005576~extracellular region,GO:0005615~extracellular space,GO:0005886~plasma membrane,GO:0009986~cell surface,GO:0031093~platelet alpha granule lumen,GO:0031232~extrinsic component of external side of plasma membrane,GO:0070062~extracellular exosome,GO:0072562~blood microparticle,	GO:0004252~serine-type endopeptidase activity,GO:0005102~receptor binding,GO:0005515~protein binding,GO:0008236~serine-type peptidase activity,GO:0019904~protein domain specific binding,GO:0034185~apolipoprotein binding,			+	0.628213		-0.205957	0.76688		0.332333	0.6657		0.538289	0.400211		-0.176688	0.793103		12.3397	10.885		11.1117	10.4293	11.1925	11.2635	11.5845	11.1399	11.8273	11.9088	11.7485	11.6761	12.0614	11.2027	9.92428
P01008	SERPINC1	Antithrombin-III	GO:0002438~acute inflammatory response to antigenic stimulus,GO:0007584~response to nutrient,GO:0007595~lactation,GO:0007596~blood coagulation,GO:0010951~negative regulation of endopeptidase activity,GO:2000266~regulation of blood coagulation, intrinsic pathway,	GO:0005576~extracellular region,GO:0005615~extracellular space,GO:0005886~plasma membrane,GO:0070062~extracellular exosome,GO:0072562~blood microparticle,	GO:0002020~protease binding,GO:0004867~serine-type endopeptidase inhibitor activity,GO:0005515~protein binding,GO:0008201~heparin binding,			+	0.741304		0.56487	0.407386		0.0890588	0.935249		-0.475811	0.522202		-0.303569	0.674714		13.6822	11.9379	14.0934	14.8984	13.8813	13.3665	14.0155	14.5077	15.0336	14.5027	13.2731	14.0403	13.9128	14.0446	14.4302	13.2681
P01009;A0A024R6I7;A0A0G2JRN3;G3V2B9;A0A0G2JPK4;P20848	SERPINA1	Alpha-1-antitrypsin;Short peptide from AAT	GO:0002576~platelet degranulation,GO:0006888~ER to Golgi vesicle-mediated transport,GO:0006953~acute-phase response,GO:0007596~blood coagulation,GO:0010951~negative regulation of endopeptidase activity,GO:0048208~COPII vesicle coating,	GO:0000139~Golgi membrane,GO:0005576~extracellular region,GO:0005578~proteinaceous extracellular matrix,GO:0005615~extracellular space,GO:0005783~endoplasmic reticulum,GO:0005788~endoplasmic reticulum lumen,GO:0005794~Golgi apparatus,GO:0030134~ER to Golgi transport vesicle,GO:0031093~platelet alpha granule lumen,GO:0033116~endoplasmic reticulum-Golgi intermediate compartment membrane,GO:0070062~…	GO:0001948~glycoprotein binding,GO:0002020~protease binding,GO:0004867~serine-type endopeptidase inhibitor activity,GO:0005515~protein binding,GO:0042802~identical protein binding,			+	0.00212615	+	2.42638	5.84634e-05	+	1.86441	0.00392247	+	-0.561964	0.319815		-0.175053	0.764671		16.3298	15.7322	17.004	16.0109	18.1836	19.0821	18.4964	18.5961	19.1357	18.6798	17.5445	18.5085	18.348	19.6874	17.9991	17.8752
P01011;G3V3A0;G3V595	SERPINA3	Alpha-1-antichymotrypsin;Alpha-1-antichymotrypsin His-Pro-less	GO:0002576~platelet degranulation,GO:0006953~acute-phase response,GO:0006954~inflammatory response,GO:0010951~negative regulation of endopeptidase activity,GO:0019216~regulation of lipid metabolic process,GO:0030277~maintenance of gastrointestinal epithelium,	GO:0005576~extracellular region,GO:0005615~extracellular space,GO:0005622~intracellular,GO:0005634~nucleus,GO:0031093~platelet alpha granule lumen,GO:0070062~extracellular exosome,GO:0072562~blood microparticle,	GO:0003677~DNA binding,GO:0004867~serine-type endopeptidase inhibitor activity,GO:0005515~protein binding,			+	0.117747		0.970617	0.110915		-0.213943	0.810565		-1.18456	0.0485434		-0.0424801	0.949923			12.0736	13.7155	14.0473	14.5312	14.2859	14.4468	13.9735	14.132	14.1272	13.2355	12.5747	13.3844	15.2618	13.8848	13.4742
P01023;CON__ENSEMBL:ENSBTAP00000024146;H0YFH1;F8W7L3	A2M	Alpha-2-macroglobulin	GO:0001869~negative regulation of complement activation, lectin pathway,GO:0002576~platelet degranulation,GO:0007597~blood coagulation, intrinsic pathway,GO:0010951~negative regulation of endopeptidase activity,GO:0022617~extracellular matrix disassembly,GO:0043547~positive regulation of GTPase activity,GO:0048863~stem cell differentiation,GO:0051056~regulation of small GTPase mediated signal tra…	GO:0005576~extracellular region,GO:0005829~cytosol,GO:0031093~platelet alpha granule lumen,GO:0070062~extracellular exosome,GO:0072562~blood microparticle,	GO:0002020~protease binding,GO:0004866~endopeptidase inhibitor activity,GO:0004867~serine-type endopeptidase inhibitor activity,GO:0005096~GTPase activator activity,GO:0005102~receptor binding,GO:0005515~protein binding,GO:0019838~growth factor binding,GO:0019899~enzyme binding,GO:0019959~interleukin-8 binding,GO:0019966~interleukin-1 binding,GO:0043120~tumor necrosis factor binding,GO:0048306~ca…	+		+	0.0141191		2.02085	0.000982565	+	0.788002	0.260769		-1.23285	0.0411354		-0.71192	0.22109		17.3236	18.9266	18.0367	18.9235	20.45	19.8595	20.3656	20.7778	19.9938	20.4941	18.2233	18.7176	20.3309	19.6498	19.4647	19.7202
P01024;M0QYC8;CON__Q2UVX4;M0QXZ3;M0R0Q9;M0R1Q1;O95568	C3	Complement C3;Complement C3 beta chain;C3-beta-c;Complement C3 alpha chain;C3a anaphylatoxin;Acylation stimulating protein;Complement C3b alpha chain;Complement C3c alpha chain fragment 1;Complement C3dg fragment;Complement C3g fragment;Complement C3d fragment;Complement C3f fragment;Complement C3c alpha chain fragment 2	GO:0001798~positive regulation of type IIa hypersensitivity,GO:0001934~positive regulation of protein phosphorylation,GO:0001970~positive regulation of activation of membrane attack complex,GO:0006508~proteolysis,GO:0006631~fatty acid metabolic process,GO:0006954~inflammatory response,GO:0006955~immune response,GO:0006956~complement activation,GO:0006957~complement activation, alternative pathway…	GO:0005576~extracellular region,GO:0005615~extracellular space,GO:0005886~plasma membrane,GO:0070062~extracellular exosome,GO:0072562~blood microparticle,	GO:0004252~serine-type endopeptidase activity,GO:0004866~endopeptidase inhibitor activity,GO:0005102~receptor binding,GO:0005515~protein binding,GO:0031715~C5L2 anaphylatoxin chemotactic receptor binding,	+		+	0.0808417		0.987818	0.03536		0.271325	0.651479		-0.716493	0.146576		-0.419593	0.390594		17.7553	16.9335	18.3701	17.5895	18.3152	19.0886	18.3995	18.7219	18.799	18.5752	17.5176	18.0448	18.2379	19.0342	17.8358	17.821
P01031	C5	Complement C5;Complement C5 beta chain;Complement C5 alpha chain;C5a anaphylatoxin;Complement C5 alpha chain	GO:0000187~activation of MAPK activity,GO:0001701~in utero embryonic development,GO:0006935~chemotaxis,GO:0006950~response to stress,GO:0006954~inflammatory response,GO:0006956~complement activation,GO:0006957~complement activation, alternative pathway,GO:0006958~complement activation, classical pathway,GO:0007166~cell surface receptor signaling pathway,GO:0007186~G-protein coupled receptor signa…	GO:0005576~extracellular region,GO:0005579~membrane attack complex,GO:0005615~extracellular space,GO:0070062~extracellular exosome,	GO:0004866~endopeptidase inhibitor activity,GO:0005102~receptor binding,GO:0005515~protein binding,GO:0008009~chemokine activity,			+	0.417876		0.556864	0.476306								-0.746121	0.22109				11.0241	10.2695				11.7306	10.8291	11.0514				11.2173	10.1384	10.017
P01042	KNG1	Kininogen-1;Kininogen-1 heavy chain;T-kinin;Bradykinin;Lysyl-bradykinin;Kininogen-1 light chain;Low molecular weight growth-promoting factor	GO:0002576~platelet degranulation,GO:0006954~inflammatory response,GO:0007162~negative regulation of cell adhesion,GO:0007204~positive regulation of cytosolic calcium ion concentration,GO:0007597~blood coagulation, intrinsic pathway,GO:0010951~negative regulation of endopeptidase activity,GO:0030195~negative regulation of blood coagulation,GO:0042311~vasodilation,GO:0043065~positive regulation of…	GO:0005576~extracellular region,GO:0005615~extracellular space,GO:0005886~plasma membrane,GO:0031093~platelet alpha granule lumen,GO:0070062~extracellular exosome,GO:0072562~blood microparticle,	GO:0004869~cysteine-type endopeptidase inhibitor activity,GO:0005102~receptor binding,GO:0005515~protein binding,GO:0008201~heparin binding,GO:0008270~zinc ion binding,			+	0.568737		-0.402299	0.58184		-0.805555	0.326979		-0.403256	0.593052		0.441257	0.541919		13.3645	13.9696	16.3652	14.0485	13.9735	14.3248	14.2472	13.9161	13.4086	14.3378	13.5506	13.5791	13.7645	15.5074	13.9253	13.995
P01591;D6RD17;D6RHJ6;C9JA05	IGJ;JCHAIN	Immunoglobulin J chain	GO:0001895~retina homeostasis,GO:0002250~adaptive immune response,GO:0003094~glomerular filtration,GO:0006898~receptor-mediated endocytosis,GO:0006955~immune response,GO:0019731~antibacterial humoral response,GO:0032461~positive regulation of protein oligomerization,GO:0045087~innate immune response,GO:0060267~positive regulation of respiratory burst,	GO:0005576~extracellular region,GO:0005615~extracellular space,GO:0070062~extracellular exosome,GO:0071748~monomeric IgA immunoglobulin complex,GO:0071750~dimeric IgA immunoglobulin complex,GO:0071751~secretory IgA immunoglobulin complex,GO:0071752~secretory dimeric IgA immunoglobulin complex,GO:0071756~pentameric IgM immunoglobulin complex,GO:0071757~hexameric IgM immunoglobulin complex,GO:00725…				+	0.0134871		-0.274176	0.58184		1.35601	0.0143589		1.63019	0.00221149	+	0.53417	0.243644		16.2331	16.8979	16.3611	16.4977	16.7387	16.5759	16.8075	15.7881	15.6241	15.8054	17.9406	18.3294	17.2904	16.4831	17.1953	16.594
P01594;P01593	IGKV1-33	Ig kappa chain V-I region AU;Ig kappa chain V-I region AG							0.150492		0.117515	0.913789		1.66447	0.127578		1.54696	0.0386133						9.29166			9.36739	10.3804	8.47977				11.0059	11.0657	10.7967
P01602	IGKV1-5	Ig kappa chain V-I region HK102	GO:0002377~immunoglobulin production,GO:0006508~proteolysis,GO:0006898~receptor-mediated endocytosis,GO:0006955~immune response,GO:0006956~complement activation,GO:0006958~complement activation, classical pathway,GO:0038095~Fc-epsilon receptor signaling pathway,GO:0038096~Fc-gamma receptor signaling pathway involved in phagocytosis,GO:0050776~regulation of immune response,	GO:0005576~extracellular region,GO:0005886~plasma membrane,GO:0070062~extracellular exosome,GO:0072562~blood microparticle,	GO:0003823~antigen binding,GO:0004252~serine-type endopeptidase activity,				0.694435		-0.116303	0.871853		-0.280557	0.654204		-0.164254	0.786293					14.6029	15.0651			14.9844	14.3738	14.7949				14.6694	14.8137	14.1771
P01619	P01619	Ig kappa chain V-III region B6							0.0777489		-0.823299	0.0783258		0.347392	0.558541		1.17069	0.0225206		0.705882	0.15909		14.8834	15.2704	13.4851	14.7254	13.813	14.1336	13.7922	13.4053	14.1536	13.3089	15.3087	15.0885	14.4181	14.0202	15.0512	14.3495
P01624;A0A087WSY6;A0A0C4DH90;A0A075B6H7;A0A0C4DH55	IGKV3D-15	Ig kappa chain V-III region POM							0.124608		-1.0734	0.172363		0.342594	0.679201		1.416	0.0467928					15.1023	16.2077			14.6243	14.8917	14.2289				16.4056	16.3306	15.2566
P01699	IGLV1-44	Ig lambda chain V-I region VOR	GO:0006508~proteolysis,GO:0006898~receptor-mediated endocytosis,GO:0006955~immune response,GO:0006956~complement activation,GO:0006958~complement activation, classical pathway,GO:0038095~Fc-epsilon receptor signaling pathway,GO:0038096~Fc-gamma receptor signaling pathway involved in phagocytosis,GO:0050776~regulation of immune response,	GO:0005576~extracellular region,GO:0005886~plasma membrane,	GO:0003823~antigen binding,GO:0004252~serine-type endopeptidase activity,				0.049393		-1.82187	0.0916634		1.11899	0.323848		2.94086	0.00221149	+					11.5576			10.2338	9.56311	9.4103				13.257	13.1905	11.5823
P01700	IGLV1-47	Ig lambda chain V-I region HA	GO:0006508~proteolysis,GO:0006898~receptor-mediated endocytosis,GO:0006955~immune response,GO:0006956~complement activation,GO:0006958~complement activation, classical pathway,GO:0038095~Fc-epsilon receptor signaling pathway,GO:0038096~Fc-gamma receptor signaling pathway involved in phagocytosis,GO:0050776~regulation of immune response,	GO:0005576~extracellular region,GO:0005886~plasma membrane,GO:0070062~extracellular exosome,GO:0072562~blood microparticle,	GO:0003823~antigen binding,GO:0004252~serine-type endopeptidase activity,				0.0441576		0.669175	0.233054		1.4756	0.0205122		0.806425	0.0950069		0.0718333	0.886728			10.1177		9.43629	10.7109	10.384	10.6424		9.98835	10.5052	11.5318	11.658	10.5679	10.1995	10.6293	10.7252
P01701	IGLV1-51	Ig lambda chain V-I region NEW	GO:0006508~proteolysis,GO:0006898~receptor-mediated endocytosis,GO:0006955~immune response,GO:0006956~complement activation,GO:0006958~complement activation, classical pathway,GO:0038095~Fc-epsilon receptor signaling pathway,GO:0038096~Fc-gamma receptor signaling pathway involved in phagocytosis,GO:0050776~regulation of immune response,	GO:0005576~extracellular region,GO:0005886~plasma membrane,GO:0070062~extracellular exosome,	GO:0003823~antigen binding,GO:0004252~serine-type endopeptidase activity,				0.00189221	+	-0.14036	0.781936		1.94338	0.000955508	+	2.08374	0.000416422	+	-0.304985	0.534852		14.1131	14.2929	13.4906	13.7529	13.2825	14.0114	13.457	13.7881	14.1685	13.9245	16.3022	16.4758	14.7891	13.7233	13.524	13.1537
P01703	IGLV1-40	Ig lambda chain V-I region NEWM	GO:0006508~proteolysis,GO:0006898~receptor-mediated endocytosis,GO:0006955~immune response,GO:0006956~complement activation,GO:0006958~complement activation, classical pathway,GO:0038095~Fc-epsilon receptor signaling pathway,GO:0038096~Fc-gamma receptor signaling pathway involved in phagocytosis,GO:0050776~regulation of immune response,	GO:0005576~extracellular region,GO:0005886~plasma membrane,	GO:0003823~antigen binding,GO:0004252~serine-type endopeptidase activity,				0.0453496		-0.680242	0.479834		1.63306	0.0842094		2.3133	0.00324287	+					12.5591			11.5814	12.2005	11.8548				14.618	14.6218	13.3367
P01706	IGLV2-11	Ig lambda chain V-II region BOH	GO:0006508~proteolysis,GO:0006898~receptor-mediated endocytosis,GO:0006955~immune response,GO:0006956~complement activation,GO:0006958~complement activation, classical pathway,GO:0038095~Fc-epsilon receptor signaling pathway,GO:0038096~Fc-gamma receptor signaling pathway involved in phagocytosis,GO:0050776~regulation of immune response,	GO:0005576~extracellular region,GO:0005886~plasma membrane,GO:0070062~extracellular exosome,	GO:0003823~antigen binding,GO:0004252~serine-type endopeptidase activity,				0.179675		-0.693951	0.36735		0.702833	0.366751		1.39678	0.0386133					13.3415	13.2856			12.7141	12.9825	12.1622				14.4144	14.6994	12.9353
P01709	IGLV2-8	Ig lambda chain V-II region MGC	GO:0006508~proteolysis,GO:0006898~receptor-mediated endocytosis,GO:0006955~immune response,GO:0006956~complement activation,GO:0006958~complement activation, classical pathway,GO:0038095~Fc-epsilon receptor signaling pathway,GO:0038096~Fc-gamma receptor signaling pathway involved in phagocytosis,GO:0050776~regulation of immune response,	GO:0005576~extracellular region,GO:0005886~plasma membrane,	GO:0003823~antigen binding,GO:0004252~serine-type endopeptidase activity,
P01721	IGLV6-57	Ig lambda chain V-VI region AR	GO:0006508~proteolysis,GO:0006898~receptor-mediated endocytosis,GO:0006955~immune response,GO:0006956~complement activation,GO:0006958~complement activation, classical pathway,GO:0038095~Fc-epsilon receptor signaling pathway,GO:0038096~Fc-gamma receptor signaling pathway involved in phagocytosis,GO:0050776~regulation of immune response,	GO:0005576~extracellular region,GO:0005886~plasma membrane,GO:0070062~extracellular exosome,	GO:0003823~antigen binding,GO:0004252~serine-type endopeptidase activity,				0.0988843		2.19631	0.0505795		3.32369	0.0092212	+	1.12738	0.129178						9.44873			12.1796	11.4998	11.2558				13.2543	13.4274	11.6356
P01743;P0DP01;A0A0C4DH29;A0A0B4J2H0;P01742	IGHV1-3;IGHV1-69-2	Ig heavy chain V-I region HG3;Ig heavy chain V-I region EU							0.0191497		-0.919086	0.0505795		0.799153	0.168161		1.71824	0.00221149	+	0.772427	0.128361		13.172	12.9281	13.045	11.3803	11.9318	11.9678	11.8359	11.6324	11.4967	11.409	13.5992	14.0165	12.6759	12.2535	12.7465	12.4541
P01764	IGHV3-23	Ig heavy chain V-III region 23	GO:0006508~proteolysis,GO:0006898~receptor-mediated endocytosis,GO:0006910~phagocytosis, recognition,GO:0006911~phagocytosis, engulfment,GO:0006955~immune response,GO:0006956~complement activation,GO:0006958~complement activation, classical pathway,GO:0038095~Fc-epsilon receptor signaling pathway,GO:0038096~Fc-gamma receptor signaling pathway involved in phagocytosis,GO:0042742~defense response t…	GO:0005576~extracellular region,GO:0005615~extracellular space,GO:0005886~plasma membrane,GO:0009897~external side of plasma membrane,GO:0042571~immunoglobulin complex, circulating,GO:0070062~extracellular exosome,GO:0072562~blood microparticle,	GO:0003823~antigen binding,GO:0004252~serine-type endopeptidase activity,GO:0034987~immunoglobulin receptor binding,				0.105173		-1.35254	0.143439		0.0193237	0.980944		1.37186	0.043635						12.8006			11.6204	11.3568	11.3671				12.961	13.4142	12.0846
P01780;A0A0B4J1V1;P01763;P01762;A0A075B7F0;P01766	IGHV3-21	Ig heavy chain V-III region JON;Ig heavy chain V-III region WEA;Ig heavy chain V-III region TRO							0.0419945		-1.28665	0.0108166		-0.355593	0.554004		0.931062	0.0497445		0.894808	0.0715799			15.3616	14.891	15.3399	13.9216	12.7009	13.6698	14.4552	14.2015	14.5161	15.2338	14.9569	14.335	14.8175	14.9392	14.6602
P01833	PIGR	Polymeric immunoglobulin receptor;Secretory component	GO:0001580~detection of chemical stimulus involved in sensory perception of bitter taste,GO:0001895~retina homeostasis,GO:0002415~immunoglobulin transcytosis in epithelial cells mediated by polymeric immunoglobulin receptor,GO:0007173~epidermal growth factor receptor signaling pathway,GO:0038093~Fc receptor signaling pathway,GO:0043113~receptor clustering,	GO:0005615~extracellular space,GO:0005886~plasma membrane,GO:0005887~integral component of plasma membrane,GO:0043235~receptor complex,GO:0070062~extracellular exosome,	GO:0001792~polymeric immunoglobulin receptor activity,				0.506245								-0.24122	0.663684									11.1102	11.6509	11.6585				11.6535	10.989	11.0534
P01834;A0A5H1ZRQ3	IGKC	Ig kappa chain C region	GO:0001895~retina homeostasis,GO:0006508~proteolysis,GO:0006898~receptor-mediated endocytosis,GO:0006910~phagocytosis, recognition,GO:0006911~phagocytosis, engulfment,GO:0006955~immune response,GO:0006956~complement activation,GO:0006958~complement activation, classical pathway,GO:0038095~Fc-epsilon receptor signaling pathway,GO:0038096~Fc-gamma receptor signaling pathway involved in phagocytosis…	GO:0005576~extracellular region,GO:0005615~extracellular space,GO:0005886~plasma membrane,GO:0009897~external side of plasma membrane,GO:0042571~immunoglobulin complex, circulating,GO:0070062~extracellular exosome,GO:0072562~blood microparticle,	GO:0003823~antigen binding,GO:0004252~serine-type endopeptidase activity,GO:0034987~immunoglobulin receptor binding,				0.00214006	+	-0.699112	0.0386099		0.674041	0.0994101		1.37315	0.00140209	+	1.04662	0.0119364		19.1838	19.8946	19.1344	19.7852	18.684	18.8039	18.6493	18.9934	18.7372	18.9346	20.4628	20.5154	19.5424	19.9484	19.9316	19.6611
P01871	IGHM	Ig mu chain C region	GO:0002250~adaptive immune response,GO:0006910~phagocytosis, recognition,GO:0006911~phagocytosis, engulfment,GO:0006958~complement activation, classical pathway,GO:0019731~antibacterial humoral response,GO:0045087~innate immune response,GO:0050829~defense response to Gram-negative bacterium,GO:0050853~B cell receptor signaling pathway,GO:0050871~positive regulation of B cell activation,	GO:0005615~extracellular space,GO:0005886~plasma membrane,GO:0009897~external side of plasma membrane,GO:0009986~cell surface,GO:0016021~integral component of membrane,GO:0070062~extracellular exosome,GO:0071756~pentameric IgM immunoglobulin complex,GO:0071757~hexameric IgM immunoglobulin complex,GO:0072562~blood microparticle,	GO:0003697~single-stranded DNA binding,GO:0003823~antigen binding,GO:0005515~protein binding,GO:0031210~phosphatidylcholine binding,GO:0034987~immunoglobulin receptor binding,GO:0042834~peptidoglycan binding,				0.0154284		-0.646156	0.220442		1.35278	0.0329214		1.99893	0.00202753	+	1.10333	0.0653402		19.9061	21.1323	19.2797	20.8676	19.5739	19.7883	19.6078	19.5906	19.6723	19.6688	22.1178	22.1584	20.6714	20.3133	21.3142	20.6333
P02452	COL1A1	Collagen alpha-1(I) chain	GO:0001501~skeletal system development,GO:0001568~blood vessel development,GO:0001649~osteoblast differentiation,GO:0001957~intramembranous ossification,GO:0001958~endochondral ossification,GO:0007155~cell adhesion,GO:0007596~blood coagulation,GO:0007601~visual perception,GO:0007605~sensory perception of sound,GO:0010718~positive regulation of epithelial to mesenchymal transition,GO:0010812~negat…	GO:0005576~extracellular region,GO:0005581~collagen trimer,GO:0005584~collagen type I trimer,GO:0005615~extracellular space,GO:0005788~endoplasmic reticulum lumen,GO:0005794~Golgi apparatus,GO:0016021~integral component of membrane,GO:0030141~secretory granule,GO:0031012~extracellular matrix,	GO:0005201~extracellular matrix structural constituent,GO:0005515~protein binding,GO:0042802~identical protein binding,GO:0046872~metal ion binding,GO:0048407~platelet-derived growth factor binding,				0.0221241		-1.61934	0.00507984	+	-1.17055	0.0842094		0.448788	0.477789		1.48311	0.023038		15.6617	13.9152	15.4227	13.4327	13.7114	13.0613	12.6243	12.4066	12.8654	13.2633	13.4796	13.669	13.1639	14.4111	14.4328	14.5716
P02647;F8W696	APOA1	Apolipoprotein A-I;Proapolipoprotein A-I;Truncated apolipoprotein A-I	GO:0001523~retinoid metabolic process,GO:0001932~regulation of protein phosphorylation,GO:0001935~endothelial cell proliferation,GO:0002576~platelet degranulation,GO:0002740~negative regulation of cytokine secretion involved in immune response,GO:0006644~phospholipid metabolic process,GO:0006656~phosphatidylcholine biosynthetic process,GO:0006695~cholesterol biosynthetic process,GO:0006869~lipid …	GO:0005576~extracellular region,GO:0005615~extracellular space,GO:0005634~nucleus,GO:0005769~early endosome,GO:0005788~endoplasmic reticulum lumen,GO:0005829~cytosol,GO:0005886~plasma membrane,GO:0009986~cell surface,GO:0030139~endocytic vesicle,GO:0031410~cytoplasmic vesicle,GO:0034361~very-low-density lipoprotein particle,GO:0034364~high-density lipoprotein particle,GO:0034365~discoidal high-de…	GO:0001540~beta-amyloid binding,GO:0005515~protein binding,GO:0005543~phospholipid binding,GO:0005548~phospholipid transporter activity,GO:0008035~high-density lipoprotein particle binding,GO:0008289~lipid binding,GO:0015485~cholesterol binding,GO:0017127~cholesterol transporter activity,GO:0019899~enzyme binding,GO:0031210~phosphatidylcholine binding,GO:0034190~apolipoprotein receptor binding,GO…			+	0.16735		-0.163235	0.789562		0.187371	0.822131		0.350606	0.59199		-0.937404	0.124084		21.579	19.8809	21.4455	19.7274	20.6141	19.8957	20.6546	20.9926	19.9809	20.8319	20.5573	21.1106	20.8688	20.0985	19.6114	18.9628
P02649;H0Y7L5;E9PEV4;E7ERP7;CON__Q03247	APOE	Apolipoprotein E	GO:0000302~response to reactive oxygen species,GO:0001523~retinoid metabolic process,GO:0001937~negative regulation of endothelial cell proliferation,GO:0002021~response to dietary excess,GO:0006641~triglyceride metabolic process,GO:0006707~cholesterol catabolic process,GO:0006869~lipid transport,GO:0006874~cellular calcium ion homeostasis,GO:0006898~receptor-mediated endocytosis,GO:0006979~respo…	GO:0005576~extracellular region,GO:0005615~extracellular space,GO:0005623~cell,GO:0005634~nucleus,GO:0005737~cytoplasm,GO:0005769~early endosome,GO:0005783~endoplasmic reticulum,GO:0005794~Golgi apparatus,GO:0005886~plasma membrane,GO:0016020~membrane,GO:0030425~dendrite,GO:0031012~extracellular matrix,GO:0034361~very-low-density lipoprotein particle,GO:0034362~low-density lipoprotein particle,GO…	GO:0001540~beta-amyloid binding,GO:0005319~lipid transporter activity,GO:0005515~protein binding,GO:0005543~phospholipid binding,GO:0008201~heparin binding,GO:0008289~lipid binding,GO:0015485~cholesterol binding,GO:0016209~antioxidant activity,GO:0017127~cholesterol transporter activity,GO:0042802~identical protein binding,GO:0042803~protein homodimerization activity,GO:0046911~metal chelating ac…			+	8.53179e-05	+	-4.17171	2.72395e-07	+	-4.31366	1.89941e-06	+	-0.141946	0.831301		-0.0884041	0.885007		22.6623	21.5682	22.5307	21.5211	19.2147	18.0731	17.1569	17.7376	17.6421	17.5687	17.5701	17.9641	17.7365	18.388	17.369	17.6743
V9GYE3;V9GYG9;V9GYM3;P02652;V9GYC1;V9GYS1	APOA2	Apolipoprotein A-II;Proapolipoprotein A-II;Truncated apolipoprotein A-II	GO:0001523~retinoid metabolic process,GO:0002526~acute inflammatory response,GO:0002740~negative regulation of cytokine secretion involved in immune response,GO:0006641~triglyceride metabolic process,GO:0006656~phosphatidylcholine biosynthetic process,GO:0006869~lipid transport,GO:0008203~cholesterol metabolic process,GO:0009395~phospholipid catabolic process,GO:0009749~response to glucose,GO:001…	GO:0005576~extracellular region,GO:0005769~early endosome,GO:0005788~endoplasmic reticulum lumen,GO:0005829~cytosol,GO:0034361~very-low-density lipoprotein particle,GO:0034364~high-density lipoprotein particle,GO:0034366~spherical high-density lipoprotein particle,GO:0042627~chylomicron,GO:0070062~extracellular exosome,GO:0072562~blood microparticle,	GO:0005319~lipid transporter activity,GO:0005515~protein binding,GO:0005543~phospholipid binding,GO:0008035~high-density lipoprotein particle binding,GO:0008289~lipid binding,GO:0015485~cholesterol binding,GO:0017127~cholesterol transporter activity,GO:0031210~phosphatidylcholine binding,GO:0034190~apolipoprotein receptor binding,GO:0042803~protein homodimerization activity,GO:0046982~protein het…			+	0.0635162		-0.19507	0.72197		-0.380831	0.537701		-0.185761	0.765632		-1.13374	0.0398936		17.493	16.3211	17.3293	16.3163	16.7291	15.9871	16.9837	16.9973	16.2002	17.1218	16.3485	16.8808	16.223	16.1803	15.3784	15.0497
P02671;A0A087WUA0;CON__P02672	FGA	Fibrinogen alpha chain;Fibrinopeptide A;Fibrinogen alpha chain	GO:0002250~adaptive immune response,GO:0002576~platelet degranulation,GO:0006461~protein complex assembly,GO:0007160~cell-matrix adhesion,GO:0007165~signal transduction,GO:0007596~blood coagulation,GO:0030168~platelet activation,GO:0030198~extracellular matrix organization,GO:0031639~plasminogen activation,GO:0034116~positive regulation of heterotypic cell-cell adhesion,GO:0042730~fibrinolysis,GO…	GO:0005576~extracellular region,GO:0005577~fibrinogen complex,GO:0005615~extracellular space,GO:0005886~plasma membrane,GO:0005938~cell cortex,GO:0009897~external side of plasma membrane,GO:0009986~cell surface,GO:0031091~platelet alpha granule,GO:0031093~platelet alpha granule lumen,GO:0070062~extracellular exosome,GO:0072562~blood microparticle,GO:1903561~extracellular vesicle,	GO:0005102~receptor binding,GO:0005198~structural molecule activity,GO:0005515~protein binding,GO:0030674~protein binding, bridging,GO:0046872~metal ion binding,GO:0050839~cell adhesion molecule binding,			+	0.452339		0.129358	0.804467		-0.082497	0.91151		-0.211855	0.709132		-0.639606	0.195281		20.1531	20.3304	20.0312	20.2997	19.7727	20.951	19.8097	20.3057	21.0199	20.139	21.012	19.6088	19.7426	19.5724	19.4265	20.0812
P02675;D6REL8;CON__P02676	FGB	Fibrinogen beta chain;Fibrinopeptide B;Fibrinogen beta chain	GO:0002250~adaptive immune response,GO:0002576~platelet degranulation,GO:0007160~cell-matrix adhesion,GO:0007165~signal transduction,GO:0007596~blood coagulation,GO:0030168~platelet activation,GO:0030198~extracellular matrix organization,GO:0031639~plasminogen activation,GO:0034116~positive regulation of heterotypic cell-cell adhesion,GO:0042730~fibrinolysis,GO:0043152~induction of bacterial aggl…	GO:0005576~extracellular region,GO:0005577~fibrinogen complex,GO:0005615~extracellular space,GO:0005886~plasma membrane,GO:0005938~cell cortex,GO:0009897~external side of plasma membrane,GO:0009986~cell surface,GO:0031091~platelet alpha granule,GO:0031093~platelet alpha granule lumen,GO:0070062~extracellular exosome,GO:0072562~blood microparticle,GO:1903561~extracellular vesicle,	GO:0005102~receptor binding,GO:0005198~structural molecule activity,GO:0005515~protein binding,GO:0030674~protein binding, bridging,GO:0050839~cell adhesion molecule binding,GO:0051087~chaperone binding,			+	0.354723		0.380407	0.363115		0.362433	0.497138		-0.0179735	0.97251		-0.502642	0.22109		18.908	19.303	18.8745	19.1462	18.9422	20.014	19.0087	19.3608	20.067	19.2371	20.0262	19.102	19.1329	18.8648	18.6963	19.246
P02679;C9JEU5;C9JC84;C9JPQ9;C9JU00	FGG	Fibrinogen gamma chain	GO:0002576~platelet degranulation,GO:0007160~cell-matrix adhesion,GO:0007165~signal transduction,GO:0007596~blood coagulation,GO:0009306~protein secretion,GO:0030168~platelet activation,GO:0030198~extracellular matrix organization,GO:0031639~plasminogen activation,GO:0034116~positive regulation of heterotypic cell-cell adhesion,GO:0042730~fibrinolysis,GO:0043623~cellular protein complex assembly,…	GO:0005576~extracellular region,GO:0005577~fibrinogen complex,GO:0005615~extracellular space,GO:0005886~plasma membrane,GO:0005938~cell cortex,GO:0009897~external side of plasma membrane,GO:0009986~cell surface,GO:0031091~platelet alpha granule,GO:0031093~platelet alpha granule lumen,GO:0070062~extracellular exosome,GO:0072562~blood microparticle,	GO:0005102~receptor binding,GO:0005198~structural molecule activity,GO:0005515~protein binding,GO:0030674~protein binding, bridging,GO:0046872~metal ion binding,GO:0050839~cell adhesion molecule binding,			+	0.383392		0.321573	0.484306		0.0509432	0.941543		-0.270629	0.583434		-0.577376	0.192498		19.049	19.0537	19.0227	19.163	18.8861	19.74	18.8657	19.3656	20.1434	19.3613	19.7835	18.7365	18.8492	18.8226	18.4927	19.1337
X6RLJ0;P02745	C1QA	Complement C1q subcomponent subunit A	GO:0006508~proteolysis,GO:0006956~complement activation,GO:0006958~complement activation, classical pathway,GO:0007267~cell-cell signaling,GO:0010039~response to iron ion,GO:0045087~innate immune response,	GO:0005576~extracellular region,GO:0005581~collagen trimer,GO:0005602~complement component C1 complex,GO:0070062~extracellular exosome,	GO:0004252~serine-type endopeptidase activity,GO:0005515~protein binding,			+	0.52386		-0.186689	0.669859		0.215365	0.654204		0.402054	0.335702		-0.0578962	0.886728		13.1305	13.5691	12.4333	13.7528	12.9835	13.0914	13.118	12.9264	13.1648	12.9244	13.6754	13.8102	12.8248	12.8651	12.7032	13.3622
P02747	C1QC	Complement C1q subcomponent subunit C	GO:0006508~proteolysis,GO:0006955~immune response,GO:0006956~complement activation,GO:0006958~complement activation, classical pathway,GO:0030853~negative regulation of granulocyte differentiation,GO:0045087~innate immune response,GO:0045650~negative regulation of macrophage differentiation,	GO:0005576~extracellular region,GO:0005581~collagen trimer,GO:0005615~extracellular space,GO:0070062~extracellular exosome,GO:0072562~blood microparticle,	GO:0004252~serine-type endopeptidase activity,			+	0.210625		-0.175625	0.766443		0.737445	0.241922		0.91307	0.0666726		0.217521	0.677452		12.1361	13.8007		13.3662	12.7116	13.3408	12.8419	12.5498	12.946	13.1621	14.2384	14.2204	13.0564	13.2716	13.0975	13.0595
P02749;J3QRN2	APOH	Beta-2-glycoprotein 1	GO:0001937~negative regulation of endothelial cell proliferation,GO:0002576~platelet degranulation,GO:0006641~triglyceride metabolic process,GO:0007597~blood coagulation, intrinsic pathway,GO:0010596~negative regulation of endothelial cell migration,GO:0016525~negative regulation of angiogenesis,GO:0030194~positive regulation of blood coagulation,GO:0030195~negative regulation of blood coagulatio…	GO:0005576~extracellular region,GO:0005615~extracellular space,GO:0009986~cell surface,GO:0031012~extracellular matrix,GO:0031089~platelet dense granule lumen,GO:0034361~very-low-density lipoprotein particle,GO:0034364~high-density lipoprotein particle,GO:0042627~chylomicron,GO:0070062~extracellular exosome,	GO:0001948~glycoprotein binding,GO:0005515~protein binding,GO:0005543~phospholipid binding,GO:0008201~heparin binding,GO:0008289~lipid binding,GO:0042802~identical protein binding,GO:0060230~lipoprotein lipase activator activity,			+	0.124608		1.78604	0.0356043		0.597817	0.541151		-1.18823	0.0888982		0.317586	0.701411		11.1357	10.2582			11.8551	11.9649	12.0475	12.8081	13.1102	13.1121	9.87549	11.1362	12.8725	12.9278	12.6734
P02751;H0Y7Z1;H0Y4K8	FN1	Fibronectin;Anastellin;Ugl-Y1;Ugl-Y2;Ugl-Y3	GO:0001525~angiogenesis,GO:0001932~regulation of protein phosphorylation,GO:0002576~platelet degranulation,GO:0006953~acute-phase response,GO:0007044~cell-substrate junction assembly,GO:0007155~cell adhesion,GO:0007161~calcium-independent cell-matrix adhesion,GO:0008284~positive regulation of cell proliferation,GO:0008360~regulation of cell shape,GO:0009611~response to wounding,GO:0010628~positiv…	GO:0005576~extracellular region,GO:0005577~fibrinogen complex,GO:0005578~proteinaceous extracellular matrix,GO:0005605~basal lamina,GO:0005615~extracellular space,GO:0005793~endoplasmic reticulum-Golgi intermediate compartment,GO:0016324~apical plasma membrane,GO:0031012~extracellular matrix,GO:0031093~platelet alpha granule lumen,GO:0070062~extracellular exosome,GO:0072562~blood microparticle,	GO:0002020~protease binding,GO:0005178~integrin binding,GO:0005515~protein binding,GO:0005518~collagen binding,GO:0008201~heparin binding,GO:0016504~peptidase activator activity,GO:0042802~identical protein binding,	+		+	0.0779448		-1.82537	0.0102929		-0.937111	0.281312		0.88826	0.22845		0.954997	0.192498		14.7471	16.072	18.1371	17.2835	14.836	14.9015	14.755	14.5099	14.5257	14.8793	15.975	15.1642	15.7292	16.2345	14.7697	16.0644
P02763	ORM1	Alpha-1-acid glycoprotein 1	GO:0002576~platelet degranulation,GO:0002682~regulation of immune system process,GO:0006953~acute-phase response,GO:0006954~inflammatory response,GO:0032715~negative regulation of interleukin-6 production,GO:0032720~negative regulation of tumor necrosis factor production,	GO:0005576~extracellular region,GO:0005615~extracellular space,GO:0031093~platelet alpha granule lumen,GO:0070062~extracellular exosome,GO:0072562~blood microparticle,	GO:0005515~protein binding,			+	0.0352061		2.50368	0.00631619	+	0.444143	0.603133		-2.05953	0.00966117	+				12.7831	13.0384			15.2064	15.5638	15.4732				13.0008	12.6016	14.4623
P02776;P10720	PF4;PF4V1	Platelet factor 4;Platelet factor 4, short form;Platelet factor 4 variant;Platelet factor 4 variant(4-74);Platelet factor 4 variant(5-74);Platelet factor 4 variant(6-74)	GO:0002576~platelet degranulation,GO:0002690~positive regulation of leukocyte chemotaxis,GO:0006954~inflammatory response,GO:0006955~immune response,GO:0007186~G-protein coupled receptor signaling pathway,GO:0010628~positive regulation of gene expression,GO:0010744~positive regulation of macrophage derived foam cell differentiation,GO:0016525~negative regulation of angiogenesis,GO:0019221~cytokin…	GO:0005576~extracellular region,GO:0005615~extracellular space,GO:0031093~platelet alpha granule lumen,,GO:0005615~extracellular space,	GO:0005515~protein binding,GO:0008009~chemokine activity,GO:0008201~heparin binding,GO:0048248~CXCR3 chemokine receptor binding,			+	0.183497		1.6723	0.0506382		0.745968	0.504672		-0.926332	0.279622		0.141512	0.885007			13.0034	16.2592	15.8555	16.0004	17.6871	16.463	16.4046	17.239	16.4757	14.9875	15.2028	17.1657	16.5653	16.8908	17.1034
P02787;H7C5E8;C9JVG0;F8WEK9;F8WCI6;CON__Q29443;CON__Q0IIK2;C9JB55;F8WC57;CON__Q2HJF0	TF	Serotransferrin	GO:0001895~retina homeostasis,GO:0002576~platelet degranulation,GO:0006879~cellular iron ion homeostasis,GO:0031647~regulation of protein stability,GO:0033572~transferrin transport,GO:0048260~positive regulation of receptor-mediated endocytosis,GO:0055072~iron ion homeostasis,GO:0071281~cellular response to iron ion,GO:0097460~ferrous iron import into cell,	GO:0005576~extracellular region,GO:0005615~extracellular space,GO:0005769~early endosome,GO:0005770~late endosome,GO:0005905~clathrin-coated pit,GO:0009925~basal plasma membrane,GO:0009986~cell surface,GO:0010008~endosome membrane,GO:0016023~cytoplasmic, membrane-bounded vesicle,GO:0016324~apical plasma membrane,GO:0030120~vesicle coat,GO:0030139~endocytic vesicle,GO:0031232~extrinsic component o…	GO:0005515~protein binding,GO:0008198~ferrous iron binding,GO:0008199~ferric iron binding,GO:0015091~ferric iron transmembrane transporter activity,GO:1990459~transferrin receptor binding,			+	0.0667545		0.292361	0.72197		-0.762682	0.413597		-1.05504	0.170752		1.43949	0.0715799		17.0617	15.5716	18.0727	17.4458	16.779	16.5223	16.9692	17.8993	17.6665	18.1457	15.817	16.0057	17.0032	20.1554	18.2974	17.8567
P02790;Q9BS19	HPX	Hemopexin	GO:0002639~positive regulation of immunoglobulin production,GO:0002925~positive regulation of humoral immune response mediated by circulating immunoglobulin,GO:0006879~cellular iron ion homeostasis,GO:0006898~receptor-mediated endocytosis,GO:0015886~heme transport,GO:0016032~viral process,GO:0020027~hemoglobin metabolic process,GO:0042168~heme metabolic process,GO:0042511~positive regulation of t…	GO:0005576~extracellular region,GO:0005615~extracellular space,GO:0070062~extracellular exosome,GO:0071682~endocytic vesicle lumen,GO:0072562~blood microparticle,	GO:0005515~protein binding,GO:0015232~heme transporter activity,GO:0046872~metal ion binding,			+	0.0416238		-0.736375	0.253914		-2.10536	0.00944238	+	-1.36898	0.0467928		0.809187	0.224686		15.735	15.5006	14.0906	13.7677	13.8642	13.5511	13.8213	14.249	14.3544	14.3825	12.0481	12.6753	13.2809	16.2964	14.2476	13.9949
P04003;A6PVY5;F2Z2V7;CON__Q28065	C4BPA	C4b-binding protein alpha chain	GO:0006958~complement activation, classical pathway,GO:0030449~regulation of complement activation,GO:0045087~innate immune response,GO:0045732~positive regulation of protein catabolic process,GO:0045959~negative regulation of complement activation, classical pathway,GO:1903027~regulation of opsonization,	GO:0005576~extracellular region,GO:0005615~extracellular space,GO:0005886~plasma membrane,GO:0044216~other organism cell,GO:0072562~blood microparticle,	GO:0005515~protein binding,GO:0044822~poly(A) RNA binding,			+	0.0352678		0.277787	0.515208		-0.611017	0.202592		-0.888804	0.0324783		-0.68918	0.09821		19.4488	19.9295	19.2189	19.9295	19.5414	20.0504	19.7955	20.0043	20.0016	20.0635	18.5998	19.0442	19.4179	18.6998	19.2685	19.6925
P04004;H0YJW9;F5GX75	VTN	Vitronectin;Vitronectin V65 subunit;Vitronectin V10 subunit;Somatomedin-B	GO:0006898~receptor-mediated endocytosis,GO:0006955~immune response,GO:0007155~cell adhesion,GO:0007160~cell-matrix adhesion,GO:0010811~positive regulation of cell-substrate adhesion,GO:0010951~negative regulation of endopeptidase activity,GO:0014911~positive regulation of smooth muscle cell migration,GO:0030195~negative regulation of blood coagulation,GO:0030198~extracellular matrix organization…	GO:0005576~extracellular region,GO:0005604~basement membrane,GO:0005615~extracellular space,GO:0005796~Golgi lumen,GO:0031012~extracellular matrix,GO:0048237~rough endoplasmic reticulum lumen,GO:0070062~extracellular exosome,GO:0071062~alphav-beta3 integrin-vitronectin complex,GO:0072562~blood microparticle,	GO:0005044~scavenger receptor activity,GO:0005178~integrin binding,GO:0005515~protein binding,GO:0005518~collagen binding,GO:0008201~heparin binding,GO:0030247~polysaccharide binding,GO:0042802~identical protein binding,GO:0050840~extracellular matrix binding,			+	0.0012416	+	1.514	0.000341308	+	1.56994	0.0013109	+	0.0559401	0.91944		0.16124	0.700728		13.8456	14.6039	13.901	15.2207	15.8042	16.2417	16.0558	15.8423	15.7493	15.7473	15.859	15.8061	16.223	15.9784	16.058	16.1677
P04114;A8MUN2;A0A669KB70	APOB	Apolipoprotein B-100;Apolipoprotein B-48	GO:0001523~retinoid metabolic process,GO:0001701~in utero embryonic development,GO:0006642~triglyceride mobilization,GO:0006898~receptor-mediated endocytosis,GO:0007283~spermatogenesis,GO:0007399~nervous system development,GO:0008203~cholesterol metabolic process,GO:0009566~fertilization,GO:0009615~response to virus,GO:0009743~response to carbohydrate,GO:0009791~post-embryonic development,GO:0010…	GO:0005576~extracellular region,GO:0005615~extracellular space,GO:0005737~cytoplasm,GO:0005769~early endosome,GO:0005788~endoplasmic reticulum lumen,GO:0005789~endoplasmic reticulum membrane,GO:0005794~Golgi apparatus,GO:0005829~cytosol,GO:0005886~plasma membrane,GO:0010008~endosome membrane,GO:0015629~actin cytoskeleton,GO:0030669~clathrin-coated endocytic vesicle membrane,GO:0031904~endosome lu…	GO:0005319~lipid transporter activity,GO:0005515~protein binding,GO:0005543~phospholipid binding,GO:0008201~heparin binding,GO:0017127~cholesterol transporter activity,GO:0035473~lipase binding,GO:0050750~low-density lipoprotein particle receptor binding,			+	8.53179e-05	+	0.0238161	0.946008		-0.190885	0.659883		-0.214701	0.589762		-1.86076	7.8191e-05	+	23.0602	22.778	22.981	22.7857	22.7831	22.6181	22.865	23.3819	22.714	23.1881	22.4871	22.9657	22.6783	20.959	21.2869	20.947
P04196	HRG	Histidine-rich glycoprotein	GO:0001525~angiogenesis,GO:0002576~platelet degranulation,GO:0002839~positive regulation of immune response to tumor cell,GO:0006935~chemotaxis,GO:0007162~negative regulation of cell adhesion,GO:0008285~negative regulation of cell proliferation,GO:0010468~regulation of gene expression,GO:0010543~regulation of platelet activation,GO:0010593~negative regulation of lamellipodium assembly,GO:0010951~…	GO:0005576~extracellular region,GO:0005886~plasma membrane,GO:0031093~platelet alpha granule lumen,GO:0036019~endolysosome,GO:0070062~extracellular exosome,GO:0072562~blood microparticle,	GO:0004867~serine-type endopeptidase inhibitor activity,GO:0004869~cysteine-type endopeptidase inhibitor activity,GO:0005102~receptor binding,GO:0005515~protein binding,GO:0008201~heparin binding,GO:0008270~zinc ion binding,GO:0019865~immunoglobulin binding,GO:0020037~heme binding,GO:0043395~heparan sulfate proteoglycan binding,GO:0046872~metal ion binding,			+	0.74356		0.0204762	0.972782		0.24461	0.679201		0.224134	0.663684		0.299489	0.534852		12.6377	11.7764		10.9589	12.0825	11.7998	12.1183	11.7258	11.8098	11.3326	12.1201	12.3078	11.6789	12.1457	12.1927	11.9944
P04211	IGLV7-43	Ig lambda chain V region 4A	GO:0006508~proteolysis,GO:0006898~receptor-mediated endocytosis,GO:0006955~immune response,GO:0006956~complement activation,GO:0006958~complement activation, classical pathway,GO:0038095~Fc-epsilon receptor signaling pathway,GO:0038096~Fc-gamma receptor signaling pathway involved in phagocytosis,GO:0050776~regulation of immune response,	GO:0005576~extracellular region,GO:0005886~plasma membrane,	GO:0003823~antigen binding,GO:0004252~serine-type endopeptidase activity,				0.015737		-0.641016	0.176948		-0.20591	0.749255		0.435105	0.385512		-1.047	0.0355529			12.8257	13.2253	12.4712	11.3027	12.1564	12.0531	12.3981	12.2579	13.0303	12.6731	12.908	12.3234	10.9317	11.5302	10.9964
P04275	VWF	von Willebrand factor;von Willebrand antigen 2	GO:0002576~platelet degranulation,GO:0007155~cell adhesion,GO:0007596~blood coagulation,GO:0007597~blood coagulation, intrinsic pathway,GO:0007599~hemostasis,GO:0009611~response to wounding,GO:0030168~platelet activation,GO:0030198~extracellular matrix organization,GO:0031589~cell-substrate adhesion,GO:0051260~protein homooligomerization,	GO:0005576~extracellular region,GO:0005578~proteinaceous extracellular matrix,GO:0005783~endoplasmic reticulum,GO:0031012~extracellular matrix,GO:0031091~platelet alpha granule,GO:0031093~platelet alpha granule lumen,GO:0033093~Weibel-Palade body,GO:0070062~extracellular exosome,	GO:0001948~glycoprotein binding,GO:0002020~protease binding,GO:0005178~integrin binding,GO:0005515~protein binding,GO:0005518~collagen binding,GO:0019865~immunoglobulin binding,GO:0042802~identical protein binding,GO:0042803~protein homodimerization activity,GO:0047485~protein N-terminus binding,GO:0051087~chaperone binding,			+	0.000385594	+	-3.38139	5.58633e-06	+	-2.5637	0.000752766	+	0.817686	0.18078		-0.0822065	0.892826		22.4717	21.6406	22.4949	21.6869	19.2887	18.9252	18.0014	18.5733	18.8848	18.4793	20.6361	18.6088	19.2845	18.8484	17.714	19.2673
P04430	IGKV1-16	Ig kappa chain V-I region BAN	GO:0006508~proteolysis,GO:0006898~receptor-mediated endocytosis,GO:0006955~immune response,GO:0006956~complement activation,GO:0006958~complement activation, classical pathway,GO:0038095~Fc-epsilon receptor signaling pathway,GO:0038096~Fc-gamma receptor signaling pathway involved in phagocytosis,GO:0050776~regulation of immune response,	GO:0005576~extracellular region,GO:0005886~plasma membrane,GO:0070062~extracellular exosome,	GO:0003823~antigen binding,GO:0004252~serine-type endopeptidase activity,				0.0272959		-0.83112	0.156766		-0.537744	0.466174		0.293376	0.59199		1.49621	0.0119364			11.4759		10.7597	10.136	10.4451	9.84791	10.1644	10.8761	10.2506	10.9667	10.4294	10.3441	12.5765	11.796	10.9762
P05106;H3BM21;I3L4X8	ITGB3	Integrin beta-3;Integrin beta	GO:0001934~positive regulation of protein phosphorylation,GO:0001938~positive regulation of endothelial cell proliferation,GO:0002576~platelet degranulation,GO:0007044~cell-substrate junction assembly,GO:0007155~cell adhesion,GO:0007160~cell-matrix adhesion,GO:0007229~integrin-mediated signaling pathway,GO:0007596~blood coagulation,GO:0010595~positive regulation of endothelial cell migration,GO:0…	GO:0005634~nucleus,GO:0005886~plasma membrane,GO:0005887~integral component of plasma membrane,GO:0005925~focal adhesion,GO:0008305~integrin complex,GO:0009986~cell surface,GO:0016021~integral component of membrane,GO:0031092~platelet alpha granule membrane,GO:0031258~lamellipodium membrane,GO:0031527~filopodium membrane,GO:0031528~microvillus membrane,GO:0032587~ruffle membrane,GO:0034683~integr…	GO:0001618~virus receptor activity,GO:0001968~fibronectin binding,GO:0002020~protease binding,GO:0003756~protein disulfide isomerase activity,GO:0004872~receptor activity,GO:0005161~platelet-derived growth factor receptor binding,GO:0005515~protein binding,GO:0015026~coreceptor activity,GO:0017134~fibroblast growth factor binding,GO:0019899~enzyme binding,GO:0019960~C-X3-C chemokine binding,GO:00…				0.00341065	+	2.39171	0.00016429	+	1.27059	0.0560687		-1.12111	0.0533966		0.116064	0.878618		13.4968	13.9331	12.7762	14.0826	15.7873	15.3888	16.2161	16.2543	15.5713	16.5657	14.2507	14.0589	16.2188	15.8054	16.4096	16.0249
P05109	S100A8	Protein S100-A8;Protein S100-A8, N-terminally processed	GO:0001816~cytokine production,GO:0002523~leukocyte migration involved in inflammatory response,GO:0002526~acute inflammatory response,GO:0002544~chronic inflammatory response,GO:0002793~positive regulation of peptide secretion,GO:0006914~autophagy,GO:0006915~apoptotic process,GO:0006919~activation of cysteine-type endopeptidase activity involved in apoptotic process,GO:0006954~inflammatory respo…	GO:0005576~extracellular region,GO:0005615~extracellular space,GO:0005634~nucleus,GO:0005829~cytosol,GO:0005856~cytoskeleton,GO:0005886~plasma membrane,GO:0070062~extracellular exosome,	GO:0005509~calcium ion binding,GO:0005515~protein binding,GO:0008017~microtubule binding,GO:0008270~zinc ion binding,GO:0035662~Toll-like receptor 4 binding,GO:0050544~arachidonic acid binding,GO:0050786~RAGE receptor binding,			+	0.184681		-0.999239	0.177914		-1.39711	0.079482		-0.39787	0.578105					14.3113	12.3996			12.3693	12.3993	12.2999				11.9497	11.928	11.9972
P05160	F13B	Coagulation factor XIII B chain	GO:0007596~blood coagulation,	GO:0005576~extracellular region,				+	0.328618		-0.647986	0.550976		-1.50828	0.138383		-0.860298	0.322652					12.0796	10.3398			10.3071	11.6614	9.71672				10.1178	9.23306	9.75337
P06310	IGKV2-30	Ig kappa chain V-II region RPMI 6410	GO:0006508~proteolysis,GO:0006898~receptor-mediated endocytosis,GO:0006955~immune response,GO:0006956~complement activation,GO:0006958~complement activation, classical pathway,GO:0038095~Fc-epsilon receptor signaling pathway,GO:0038096~Fc-gamma receptor signaling pathway involved in phagocytosis,GO:0050776~regulation of immune response,	GO:0005576~extracellular region,GO:0005886~plasma membrane,GO:0070062~extracellular exosome,GO:0072562~blood microparticle,	GO:0003823~antigen binding,GO:0004252~serine-type endopeptidase activity,				0.108876		-0.63938	0.29867								0.934896	0.0907645				14.5327	14.8482				13.9722	14.2547	13.9263				14.6035	15.5589	14.7955
P06312	IGKV4-1	Ig kappa chain V-IV region	GO:0002377~immunoglobulin production,GO:0006508~proteolysis,GO:0006898~receptor-mediated endocytosis,GO:0006955~immune response,GO:0006956~complement activation,GO:0006958~complement activation, classical pathway,GO:0038095~Fc-epsilon receptor signaling pathway,GO:0038096~Fc-gamma receptor signaling pathway involved in phagocytosis,GO:0050776~regulation of immune response,	GO:0005576~extracellular region,GO:0005886~plasma membrane,GO:0072562~blood microparticle,	GO:0003823~antigen binding,GO:0004252~serine-type endopeptidase activity,				0.270284		-0.410323	0.379936		0.353703	0.522434		0.764026	0.0999768		0.247482	0.609451		14.0886	15.7207	15.1317	15.2818	14.3655	14.7721	14.3164	14.7967	14.8351	14.7866	15.6474	15.6139	14.967	15.5703	14.6591	14.4492
P06727;CON__Q32PJ2	APOA4	Apolipoprotein A-IV	GO:0001523~retinoid metabolic process,GO:0002227~innate immune response in mucosa,GO:0006695~cholesterol biosynthetic process,GO:0006869~lipid transport,GO:0006982~response to lipid hydroperoxide,GO:0007159~leukocyte cell-cell adhesion,GO:0008203~cholesterol metabolic process,GO:0010873~positive regulation of cholesterol esterification,GO:0010898~positive regulation of triglyceride catabolic proc…	GO:0005576~extracellular region,GO:0005615~extracellular space,GO:0005769~early endosome,GO:0005788~endoplasmic reticulum lumen,GO:0005829~cytosol,GO:0009986~cell surface,GO:0034361~very-low-density lipoprotein particle,GO:0034364~high-density lipoprotein particle,GO:0042627~chylomicron,GO:0070062~extracellular exosome,GO:0072562~blood microparticle,	GO:0005319~lipid transporter activity,GO:0005507~copper ion binding,GO:0005515~protein binding,GO:0008289~lipid binding,GO:0015485~cholesterol binding,GO:0016209~antioxidant activity,GO:0017127~cholesterol transporter activity,GO:0031210~phosphatidylcholine binding,GO:0042803~protein homodimerization activity,GO:0060228~phosphatidylcholine-sterol O-acyltransferase activator activity,			+	0.218847		-0.268154	0.625324		0.164613	0.819395		0.432767	0.433745		-0.547767	0.266529		16.3221	15.2702	16.639	15.7857	15.8763	16.2689	15.8659	15.4036	15.6164	15.3856	15.4151	16.7155	16.376	15.8067	15.128	14.6303
P06733;K7EM90;K7ERS8;A0A2R8Y879;A0A2R8YEM5;A0A2R8Y6G6;A0A2R8Y6I8;A0A2R8Y798;A0A2R8YEG5	ENO1	Alpha-enolase;Enolase	GO:0006094~gluconeogenesis,GO:0006096~glycolytic process,GO:0006351~transcription, DNA-templated,GO:0009615~response to virus,GO:0030308~negative regulation of cell growth,GO:0045892~negative regulation of transcription, DNA-templated,GO:0061621~canonical glycolysis,GO:0098609~cell-cell adhesion,	GO:0000015~phosphopyruvate hydratase complex,GO:0005615~extracellular space,GO:0005634~nucleus,GO:0005737~cytoplasm,GO:0005829~cytosol,GO:0005886~plasma membrane,GO:0005913~cell-cell adherens junction,GO:0016020~membrane,GO:0031430~M band,GO:0070062~extracellular exosome,	GO:0000287~magnesium ion binding,GO:0003677~DNA binding,GO:0004634~phosphopyruvate hydratase activity,GO:0005515~protein binding,GO:0044822~poly(A) RNA binding,GO:0051020~GTPase binding,GO:0098641~cadherin binding involved in cell-cell adhesion,	+			0.0191497		1.27337	0.0160049		1.07959	0.079482		-0.193771	0.738806		0.741927	0.143152		11.2953	10.8593		10.5537	12.1941	12.0846	12.4316	12.0845	11.6523	12.6099	11.5519	11.4302	12.9651	12.4568	13.6158	12.6817
P07357	C8A	Complement component C8 alpha chain	GO:0006955~immune response,GO:0006956~complement activation,GO:0006957~complement activation, alternative pathway,GO:0006958~complement activation, classical pathway,GO:0019835~cytolysis,GO:0030449~regulation of complement activation,	GO:0005576~extracellular region,GO:0005579~membrane attack complex,GO:0005615~extracellular space,GO:0016020~membrane,GO:0070062~extracellular exosome,GO:0072562~blood microparticle,	GO:0001848~complement binding,GO:0032403~protein complex binding,			+	0.255517		0.416051	0.669859		0.720893	0.466174		0.304841	0.593052		-0.656361	0.2097			10.8338			11.6052	11.0706	11.7136	11.2697	10.7688	11.071	11.812	11.5582	11.2937	11.6176	10.0065	10.1562
P07360	C8G	Complement component C8 gamma chain	GO:0006957~complement activation, alternative pathway,GO:0006958~complement activation, classical pathway,GO:0019835~cytolysis,GO:0030449~regulation of complement activation,	GO:0005576~extracellular region,GO:0005579~membrane attack complex,GO:0070062~extracellular exosome,GO:0072562~blood microparticle,	GO:0001848~complement binding,GO:0019841~retinol binding,GO:0032403~protein complex binding,			+	0.440045		0.541633	0.614311		0.743704	0.466174		0.202071	0.80911						9.43182			9.60696		10.3399				10.4901	10.0751	9.96129
P08238	HSP90AB1	Heat shock protein HSP 90-beta	GO:0001890~placenta development,GO:0006457~protein folding,GO:0006950~response to stress,GO:0006986~response to unfolded protein,GO:0009651~response to salt stress,GO:0019062~virion attachment to host cell,GO:0030511~positive regulation of transforming growth factor beta receptor signaling pathway,GO:0031396~regulation of protein ubiquitination,GO:0032092~positive regulation of protein binding,GO…	GO:0005634~nucleus,GO:0005654~nucleoplasm,GO:0005737~cytoplasm,GO:0005739~mitochondrion,GO:0005765~lysosomal membrane,GO:0005829~cytosol,GO:0005913~cell-cell adherens junction,GO:0008180~COP9 signalosome,GO:0009986~cell surface,GO:0016020~membrane,GO:0016234~inclusion body,GO:0016323~basolateral plasma membrane,GO:0016324~apical plasma membrane,GO:0031526~brush border membrane,GO:0034751~aryl hyd…	GO:0001948~glycoprotein binding,GO:0002134~UTP binding,GO:0002135~CTP binding,GO:0003725~double-stranded RNA binding,GO:0005515~protein binding,GO:0005524~ATP binding,GO:0005525~GTP binding,GO:0008144~drug binding,GO:0017098~sulfonylurea receptor binding,GO:0019887~protein kinase regulator activity,GO:0019900~kinase binding,GO:0019901~protein kinase binding,GO:0023026~MHC class II protein complex…	+			0.881649		-0.246576	0.807374								-0.157831	0.878618				10.9458	8.53607				9.62298	9.40763	9.45249				9.04668	9.70541	9.25751
P08514;A0A3B3IU79	ITGA2B	Integrin alpha-IIb;Integrin alpha-IIb heavy chain;Integrin alpha-IIb light chain, form 1;Integrin alpha-IIb light chain, form 2	GO:0002576~platelet degranulation,GO:0002687~positive regulation of leukocyte migration,GO:0007155~cell adhesion,GO:0007160~cell-matrix adhesion,GO:0007229~integrin-mediated signaling pathway,GO:0030198~extracellular matrix organization,GO:0070527~platelet aggregation,	GO:0005886~plasma membrane,GO:0005887~integral component of plasma membrane,GO:0005925~focal adhesion,GO:0008305~integrin complex,GO:0009897~external side of plasma membrane,GO:0009986~cell surface,GO:0031092~platelet alpha granule membrane,GO:0070062~extracellular exosome,GO:0072562~blood microparticle,	GO:0005515~protein binding,GO:0042802~identical protein binding,GO:0046872~metal ion binding,GO:0050840~extracellular matrix binding,GO:0070051~fibrinogen binding,				0.0238569		1.7761	0.00507984	+	0.29046	0.723231		-1.48564	0.0247538		-0.000220768	0.999632		13.8359	13.5369	15.2274	14.6126	15.8167	15.5741	16.4155	16.1707	16.0367	16.4621	13.4456	14.2344	16.101	15.4742	16.4429	16.32
P08519;A0A087WWY0	LPA	Apolipoprotein(a)	GO:0006508~proteolysis,GO:0006629~lipid metabolic process,GO:0006869~lipid transport,GO:0008015~blood circulation,GO:0010951~negative regulation of endopeptidase activity,GO:0042157~lipoprotein metabolic process,	GO:0005576~extracellular region,GO:0034358~plasma lipoprotein particle,	GO:0001968~fibronectin binding,GO:0004252~serine-type endopeptidase activity,GO:0004866~endopeptidase inhibitor activity,GO:0005515~protein binding,GO:0008201~heparin binding,GO:0034185~apolipoprotein binding,			+	0.025799		-0.0320537	0.941999		-0.0429604	0.941543		-0.0109067	0.980324		-1.05747	0.0200498		16.9847	18.0233	16.7222	17.9657	17.2584	17.1552	17.3523	17.7384	17.1413	17.7061	17.3743	17.3722	17.3966	16.3377	16.502	16.1637
Q5JPU2;Q5JPU0;Q5JPT9;Q5JPU1;P08559	PDHA1	Pyruvate dehydrogenase E1 component subunit alpha, somatic form, mitochondrial	GO:0006006~glucose metabolic process,GO:0006086~acetyl-CoA biosynthetic process from pyruvate,GO:0006090~pyruvate metabolic process,GO:0006099~tricarboxylic acid cycle,GO:0010510~regulation of acetyl-CoA biosynthetic process from pyruvate,GO:0046487~glyoxylate metabolic process,GO:0061732~mitochondrial acetyl-CoA biosynthetic process from pyruvate,	GO:0005634~nucleus,GO:0005739~mitochondrion,GO:0005759~mitochondrial matrix,GO:0043209~myelin sheath,GO:0043231~intracellular membrane-bounded organelle,GO:0045254~pyruvate dehydrogenase complex,	GO:0004738~pyruvate dehydrogenase activity,GO:0004739~pyruvate dehydrogenase (acetyl-transferring) activity,GO:0016624~oxidoreductase activity, acting on the aldehyde or oxo group of donors, disulfide as acceptor,GO:0034604~pyruvate dehydrogenase (NAD+) activity,				0.0272959		-0.137919	0.879874								2.12503	0.0119364				12.6812	13.8269				12.8432	13.725	12.7801				15.1512	15.6187	14.9534
P08603;Q5TFM2;A0A0D9SG88	CFH	Complement factor H	GO:0006956~complement activation,GO:0006957~complement activation, alternative pathway,GO:0030449~regulation of complement activation,	GO:0005576~extracellular region,GO:0005615~extracellular space,GO:0070062~extracellular exosome,GO:0072562~blood microparticle,	GO:0005515~protein binding,GO:0008201~heparin binding,GO:0043395~heparan sulfate proteoglycan binding,			+	0.136734		0.505219	0.307406		-0.11962	0.8834		-0.624839	0.226179		0.403922	0.434298		13.8521	12.957	14.433	14.1303	13.7911	13.9905	14.1105	15.1098	14.3706	14.7172	13.4525	13.7283	13.9895	15.3514	14.4703	14.4349
P0DJI8	SAA1	Serum amyloid A-1 protein;Amyloid protein A;Serum amyloid protein A(2-104);Serum amyloid protein A(3-104);Serum amyloid protein A(2-103);Serum amyloid protein A(2-102);Serum amyloid protein A(4-101)	GO:0000187~activation of MAPK activity,GO:0006898~receptor-mediated endocytosis,GO:0006953~acute-phase response,GO:0007204~positive regulation of cytosolic calcium ion concentration,GO:0030168~platelet activation,GO:0030593~neutrophil chemotaxis,GO:0044267~cellular protein metabolic process,GO:0045087~innate immune response,GO:0045785~positive regulation of cell adhesion,GO:0048246~macrophage che…	GO:0005576~extracellular region,GO:0005615~extracellular space,GO:0005881~cytoplasmic microtubule,GO:0034364~high-density lipoprotein particle,GO:0070062~extracellular exosome,GO:0071682~endocytic vesicle lumen,	GO:0001664~G-protein coupled receptor binding,GO:0008201~heparin binding,GO:0042056~chemoattractant activity,			+	0.0260361		3.22357	0.00507984	+	0.89739	0.397435		-2.32618	0.00530261	+					9.6505			12.7721	13.1107	12.7394				10.9158	9.69589	11.032
P0DJI9	SAA2	Serum amyloid A-2 protein	GO:0006953~acute-phase response,GO:0050918~positive chemotaxis,GO:0060326~cell chemotaxis,	GO:0005615~extracellular space,GO:0034364~high-density lipoprotein particle,GO:0070062~extracellular exosome,	GO:0042056~chemoattractant activity,			+	0.0191497		2.25321	0.00153921	+	1.09351	0.189315		-1.1597	0.0999768		-1.80328	0.0222226		12.7015	12.8367	11.5889	12.8267	14.23	16.0648	14.3294	13.7614	15.9614	14.1029	13.8052	13.7291	13.2116	11.9887	13.5471	13.2793
P0DOY3;P0DOY2;P0CF74	IGLC3		GO:0006508~proteolysis,GO:0006898~receptor-mediated endocytosis,GO:0006910~phagocytosis, recognition,GO:0006911~phagocytosis, engulfment,GO:0006956~complement activation,GO:0006958~complement activation, classical pathway,GO:0038095~Fc-epsilon receptor signaling pathway,GO:0038096~Fc-gamma receptor signaling pathway involved in phagocytosis,GO:0042742~defense response to bacterium,GO:0045087~inna…	GO:0005576~extracellular region,GO:0005615~extracellular space,GO:0005886~plasma membrane,GO:0009897~external side of plasma membrane,GO:0042571~immunoglobulin complex, circulating,GO:0072562~blood microparticle,	GO:0003823~antigen binding,GO:0004252~serine-type endopeptidase activity,GO:0034987~immunoglobulin receptor binding,				0.0134871		-0.638161	0.193638		1.37122	0.0205122		2.00938	0.00140209	+	0.304973	0.580601		16.0572	16.3694	15.5467	16.0463	14.9661	15.7081	15.216	15.217	15.7871	15.3061	18.0803	18.024	16.0241	15.6281	16.0564	15.3306
P0DP04;P01782	IGHV3-43D	Ig heavy chain V-III region DOB							0.529394		0.0447862	0.94599		0.478967	0.509268		0.434181	0.473124		0.598884	0.269821		10.8569	13.4414		12.99	12.5908	12.3805	12.1543	12.9724	12.3867	12.3606	12.8665	12.9673	12.8914	13.1013	13.2248	12.8932
P10124	SRGN	Serglycin	GO:0002576~platelet degranulation,GO:0008626~granzyme-mediated apoptotic signaling pathway,GO:0016485~protein processing,GO:0030502~negative regulation of bone mineralization,GO:0031214~biomineral tissue development,GO:0033364~mast cell secretory granule organization,GO:0033368~protease localization to mast cell secretory granule,GO:0033371~T cell secretory granule organization,GO:0033373~mainten…	GO:0000139~Golgi membrane,GO:0005576~extracellular region,GO:0005615~extracellular space,GO:0005794~Golgi apparatus,GO:0031093~platelet alpha granule lumen,GO:0042588~zymogen granule,GO:0042629~mast cell granule,	GO:0005515~protein binding,GO:0005518~collagen binding,			+	0.0713221		1.77868	0.0506382								0.041117	0.949923					9.07667				11.1996	10.7449	10.6215				10.8252	11.3888	10.4754
P10909;E7ETB4;H0YC35;H0YLK8;E5RJZ5;H0YAS8;E7ERK6;E5RG36;E5RGB0;E5RH61	CLU	Clusterin;Clusterin beta chain;Clusterin alpha chain	GO:0000902~cell morphogenesis,GO:0001774~microglial cell activation,GO:0001836~release of cytochrome c from mitochondria,GO:0002576~platelet degranulation,GO:0006629~lipid metabolic process,GO:0006956~complement activation,GO:0006958~complement activation, classical pathway,GO:0008219~cell death,GO:0009615~response to virus,GO:0017038~protein import,GO:0032286~central nervous system myelin mainte…	GO:0005576~extracellular region,GO:0005615~extracellular space,GO:0005622~intracellular,GO:0005634~nucleus,GO:0005737~cytoplasm,GO:0005739~mitochondrion,GO:0005783~endoplasmic reticulum,GO:0005794~Golgi apparatus,GO:0005829~cytosol,GO:0009986~cell surface,GO:0031012~extracellular matrix,GO:0031093~platelet alpha granule lumen,GO:0031966~mitochondrial membrane,GO:0034366~spherical high-density lip…	GO:0005515~protein binding,GO:0016887~ATPase activity,GO:0031625~ubiquitin protein ligase binding,GO:0051087~chaperone binding,GO:0051787~misfolded protein binding,			+	0.00156765	+	1.16037	0.00138061	+	1.23317	0.00392247	+	0.0727998	0.870886		0.133188	0.723926		16.9755	16.847	17.0921	17.1572	17.9775	17.9435	18.0592	18.4003	18.2765	18.4129	18.0771	18.1106	18.5657	17.7108	18.4313	18.7924
P11142;E9PN89;E9PKE3;E9PI65;E9PQQ4;E9PQK7;E9PK54;E9PLF4;E9PS65;A8K7Q2;E9PNE6;P54652	HSPA8	Heat shock cognate 71 kDa protein	GO:0000398~mRNA splicing, via spliceosome,GO:0006351~transcription, DNA-templated,GO:0006457~protein folding,GO:0006986~response to unfolded protein,GO:0007269~neurotransmitter secretion,GO:0009267~cellular response to starvation,GO:0016032~viral process,GO:0031647~regulation of protein stability,GO:0042026~protein refolding,GO:0043254~regulation of protein complex assembly,GO:0043488~regulation …	GO:0000151~ubiquitin ligase complex,GO:0000974~Prp19 complex,GO:0005615~extracellular space,GO:0005622~intracellular,GO:0005634~nucleus,GO:0005654~nucleoplasm,GO:0005681~spliceosomal complex,GO:0005730~nucleolus,GO:0005765~lysosomal membrane,GO:0005770~late endosome,GO:0005829~cytosol,GO:0005886~plasma membrane,GO:0005913~cell-cell adherens junction,GO:0005925~focal adhesion,GO:0016020~membrane,G…	GO:0001664~G-protein coupled receptor binding,GO:0001786~phosphatidylserine binding,GO:0005515~protein binding,GO:0005524~ATP binding,GO:0016887~ATPase activity,GO:0019899~enzyme binding,GO:0023026~MHC class II protein complex binding,GO:0031072~heat shock protein binding,GO:0031625~ubiquitin protein ligase binding,GO:0042623~ATPase activity, coupled,GO:0044822~poly(A) RNA binding,GO:0051082~unfo…	+			0.0713221		0.458671	0.574966		0.778096	0.353854		0.319425	0.629988		1.45617	0.0308984				11.5069	9.63916	10.679	11.8943		10.2954	11.0297	11.26	11.1761	11.6641	11.2131	12.0995	12.8527	12.5114
P11169;Q8TDB8	SLC2A3;SLC2A14	Solute carrier family 2, facilitated glucose transporter member 3;Solute carrier family 2, facilitated glucose transporter member 14	GO:0005975~carbohydrate metabolic process,GO:0015758~glucose transport,GO:0019852~L-ascorbic acid metabolic process,GO:0070837~dehydroascorbic acid transport,GO:1904659~glucose transmembrane transport,,GO:0007275~multicellular organism development,GO:0007283~spermatogenesis,GO:0030154~cell differentiation,GO:1904659~glucose transmembrane transport,	GO:0005886~plasma membrane,GO:0005887~integral component of plasma membrane,GO:0016021~integral component of membrane,GO:0070062~extracellular exosome,,GO:0005634~nucleus,GO:0016021~integral component of membrane,	GO:0005355~glucose transmembrane transporter activity,GO:0005536~glucose binding,GO:0022857~transmembrane transporter activity,GO:0033300~dehydroascorbic acid transporter activity,GO:0055056~D-glucose transmembrane transporter activity,				0.000822191		1.39032	0.00453948	+	-0.785233	0.158667		-2.17556	0.000191472	+	-1.06811	0.0280741		12.0707	11.4237		11.8832	13.1029	12.7844	13.482	13.2404	12.6483	13.8393	10.9143	10.8073	11.3004	11.6678	12.4804	12.1961
P13224	GP1BB	Platelet glycoprotein Ib beta chain	GO:0007155~cell adhesion,GO:0007166~cell surface receptor signaling pathway,GO:0007596~blood coagulation,GO:0007597~blood coagulation, intrinsic pathway,GO:0030168~platelet activation,	GO:0005886~plasma membrane,GO:0005887~integral component of plasma membrane,GO:0016021~integral component of membrane,	GO:0004888~transmembrane signaling receptor activity,GO:0005515~protein binding,GO:0042802~identical protein binding,				0.792652		-0.216541	0.787695		-0.0345081	0.972439		0.182033	0.829909		0.623297	0.366265		11.2002	8.23291		9.89172	9.30153	9.33421	9.07615	9.36913	9.62248	10.6469	9.12872	9.64114	10.4514	9.96771	10.5447	10.0327
P13501	CCL5	C-C motif chemokine 5;RANTES(3-68);RANTES(4-68)	GO:0000165~MAPK cascade,GO:0002407~dendritic cell chemotaxis,GO:0002548~monocyte chemotaxis,GO:0002676~regulation of chronic inflammatory response,GO:0006816~calcium ion transport,GO:0006874~cellular calcium ion homeostasis,GO:0006887~exocytosis,GO:0006935~chemotaxis,GO:0006954~inflammatory response,GO:0006955~immune response,GO:0007159~leukocyte cell-cell adhesion,GO:0007186~G-protein coupled re…	GO:0005576~extracellular region,GO:0005615~extracellular space,GO:0005737~cytoplasm,	GO:0004435~phosphatidylinositol phospholipase C activity,GO:0004672~protein kinase activity,GO:0005515~protein binding,GO:0008009~chemokine activity,GO:0016004~phospholipase activator activity,GO:0030298~receptor signaling protein tyrosine kinase activator activity,GO:0031726~CCR1 chemokine receptor binding,GO:0031729~CCR4 chemokine receptor binding,GO:0031730~CCR5 chemokine receptor binding,GO:0…			+	0.096845		2.14753	0.134595		4.05992	0.0169016		1.91239	0.12009		1.80821	0.143152			10.4188		7.53655	12.7953	12.7542	12.3556	9.95152	8.93166	9.9628	12.7933	12.4063	13.9131	12.6125	14.4216	11.7661
P14770	GP9	Platelet glycoprotein IX	GO:0007155~cell adhesion,GO:0007596~blood coagulation,GO:0007597~blood coagulation, intrinsic pathway,GO:0030168~platelet activation,	GO:0005886~plasma membrane,GO:0005887~integral component of plasma membrane,	GO:0005515~protein binding,				0.00432984								1.09482	0.0533966									9.97488	9.92042	9.97429				10.8373	11.1737	11.143
P15814	IGLL1	Immunoglobulin lambda-like polypeptide 1	GO:0006910~phagocytosis, recognition,GO:0006911~phagocytosis, engulfment,GO:0006955~immune response,GO:0006958~complement activation, classical pathway,GO:0042742~defense response to bacterium,GO:0045087~innate immune response,GO:0050853~B cell receptor signaling pathway,GO:0050871~positive regulation of B cell activation,	GO:0009897~external side of plasma membrane,GO:0016020~membrane,GO:0042571~immunoglobulin complex, circulating,GO:0070062~extracellular exosome,GO:0072562~blood microparticle,	GO:0003823~antigen binding,GO:0034987~immunoglobulin receptor binding,			+
P16284	PECAM1	Platelet endothelial cell adhesion molecule	GO:0001525~angiogenesis,GO:0001886~endothelial cell morphogenesis,GO:0002576~platelet degranulation,GO:0006909~phagocytosis,GO:0007155~cell adhesion,GO:0007165~signal transduction,GO:0007266~Rho protein signal transduction,GO:0008037~cell recognition,GO:0030198~extracellular matrix organization,GO:0030334~regulation of cell migration,GO:0042060~wound healing,GO:0042523~positive regulation of tyro…	GO:0005615~extracellular space,GO:0005886~plasma membrane,GO:0009897~external side of plasma membrane,GO:0016021~integral component of membrane,GO:0030054~cell junction,GO:0030485~smooth muscle contractile fiber,GO:0031092~platelet alpha granule membrane,GO:0045121~membrane raft,GO:0070062~extracellular exosome,	GO:0005515~protein binding,				0.521492		1.19572	0.311535		0.715222	0.554004		-0.480496	0.579463						9.88281			10.6566	10.9536	11.6254				10.5293	9.6728	11.592
P18206	VCL	Vinculin	GO:0002009~morphogenesis of an epithelium,GO:0002576~platelet degranulation,GO:0006928~movement of cell or subcellular component,GO:0006936~muscle contraction,GO:0007155~cell adhesion,GO:0007160~cell-matrix adhesion,GO:0030032~lamellipodium assembly,GO:0030334~regulation of cell migration,GO:0030336~negative regulation of cell migration,GO:0034333~adherens junction assembly,GO:0034394~protein loc…	GO:0005576~extracellular region,GO:0005623~cell,GO:0005829~cytosol,GO:0005856~cytoskeleton,GO:0005886~plasma membrane,GO:0005903~brush border,GO:0005911~cell-cell junction,GO:0005912~adherens junction,GO:0005913~cell-cell adherens junction,GO:0005915~zonula adherens,GO:0005916~fascia adherens,GO:0005925~focal adhesion,GO:0015629~actin cytoskeleton,GO:0030055~cell-substrate junction,GO:0043034~cos…	GO:0002162~dystroglycan binding,GO:0003779~actin binding,GO:0005198~structural molecule activity,GO:0005515~protein binding,GO:0008013~beta-catenin binding,GO:0031625~ubiquitin protein ligase binding,GO:0045294~alpha-catenin binding,GO:0045296~cadherin binding,GO:0098641~cadherin binding involved in cell-cell adhesion,				0.0134871		1.02172	0.0806836		0.233246	0.774507		-0.788476	0.170752		1.43678	0.023038			11.9048	13.0526	13.0123	13.5718	13.5509	14.0654	13.2136	13.4701	14.1981	12.0932	12.4109	14.1653	14.6283	15.4902	15.2268
P19652	ORM2	Alpha-1-acid glycoprotein 2	GO:0002576~platelet degranulation,GO:0002682~regulation of immune system process,GO:0006953~acute-phase response,	GO:0005576~extracellular region,GO:0005615~extracellular space,GO:0031093~platelet alpha granule lumen,GO:0070062~extracellular exosome,GO:0072562~blood microparticle,				+	0.385437		0.181371	0.76688		-0.0577413	0.941543		-0.239112	0.649557					11.8959	11.5579			12.0705	11.9773	11.677				11.6009	11.7244	11.6821
Q5T985;P19823;Q5T987	ITIH2	Inter-alpha-trypsin inhibitor heavy chain H2	GO:0010951~negative regulation of endopeptidase activity,GO:0030212~hyaluronan metabolic process,	GO:0005576~extracellular region,GO:0070062~extracellular exosome,GO:0072562~blood microparticle,	GO:0004866~endopeptidase inhibitor activity,GO:0004867~serine-type endopeptidase inhibitor activity,			+	0.481808		0.459886	0.307406		0.0977447	0.891414		-0.362141	0.472992		-0.42641	0.36118		13.3519	12.6306	13.1	13.0452	13.4306	12.8503	13.9653	13.6816	13.1388	13.8842	13.2776	13.0104	13.101	13.9816	12.8166	12.398
P20742	PZP	Pregnancy zone protein	GO:0007565~female pregnancy,GO:0010951~negative regulation of endopeptidase activity,	GO:0005576~extracellular region,GO:0070062~extracellular exosome,GO:0072562~blood microparticle,	GO:0004866~endopeptidase inhibitor activity,GO:0004867~serine-type endopeptidase inhibitor activity,			+	0.161941		2.25903	0.0288036		1.21615	0.236293		-1.04288	0.217873					12.66	13.5387			16.0237	13.8097	16.2418				14.296	14.5154	14.1352
P20851;Q5VVQ7	C4BPB	C4b-binding protein beta chain	GO:0006958~complement activation, classical pathway,GO:0007596~blood coagulation,GO:0030449~regulation of complement activation,GO:0045087~innate immune response,GO:0045732~positive regulation of protein catabolic process,GO:0045959~negative regulation of complement activation, classical pathway,GO:1903027~regulation of opsonization,	GO:0005576~extracellular region,GO:0005615~extracellular space,GO:0005886~plasma membrane,GO:0044216~other organism cell,	GO:0005515~protein binding,			+	0.00160117	+	0.278595	0.407322		-0.795218	0.0348707		-1.07381	0.00353331	+	-0.956915	0.0127318		17.0274	17.4363	16.6072	17.3394	17.1296	17.5146	17.4168	17.4307	17.3368	17.4585	16.081	16.3117	16.5294	16.1699	16.3716	16.7312
P21333;Q60FE5;A0A7P0NMY4;A0A087WWY3;A0A7I2V3E6;F8WE98;A0A669KBC6;H0Y5C6;H7C5L4;A0A804HL72;E7EN95;A0A804HK76;O75369	FLNA	Filamin-A	GO:0002576~platelet degranulation,GO:0007195~adenylate cyclase-inhibiting dopamine receptor signaling pathway,GO:0016479~negative regulation of transcription from RNA polymerase I promoter,GO:0030168~platelet activation,GO:0030334~regulation of cell migration,GO:0031532~actin cytoskeleton reorganization,GO:0034329~cell junction assembly,GO:0034394~protein localization to cell surface,GO:0042177~n…	GO:0005576~extracellular region,GO:0005634~nucleus,GO:0005730~nucleolus,GO:0005737~cytoplasm,GO:0005829~cytosol,GO:0005884~actin filament,GO:0005886~plasma membrane,GO:0005911~cell-cell junction,GO:0005913~cell-cell adherens junction,GO:0005925~focal adhesion,GO:0015629~actin cytoskeleton,GO:0016020~membrane,GO:0030018~Z disc,GO:0030863~cortical cytoskeleton,GO:0031012~extracellular matrix,GO:003…	GO:0001664~G-protein coupled receptor binding,GO:0001948~glycoprotein binding,GO:0004871~signal transducer activity,GO:0005515~protein binding,GO:0008134~transcription factor binding,GO:0015459~potassium channel regulator activity,GO:0017048~Rho GTPase binding,GO:0017160~Ral GTPase binding,GO:0019900~kinase binding,GO:0031267~small GTPase binding,GO:0031852~mu-type opioid receptor binding,GO:0034…	+			0.0398992		0.408908	0.574966		0.574352	0.502908		0.165444	0.839517		1.78767	0.0200498		14.2675	14.3747	15.9257	15.2493	14.6964	15.2275	15.4644	15.3995	15.5202	15.8711	14.434	14.9635	17.1884	16.925	17.4378	17.0897
P22792	CPN2	Carboxypeptidase N subunit 2	GO:0050790~regulation of catalytic activity,GO:0050821~protein stabilization,	GO:0005576~extracellular region,GO:0070062~extracellular exosome,GO:0072562~blood microparticle,	GO:0030234~enzyme regulator activity,			+	0.181039		-0.136415	0.873107		1.21913	0.138383		1.35554	0.0447911		0.588705	0.376757			11.2854	11.66	11.1505	10.9649	12.0043	11.8032	10.9228	10.9349	10.7433	13.16	12.4963	12.0969	13.4132	11.1617	10.8779
P23142	FBLN1	Fibulin-1	GO:0001933~negative regulation of protein phosphorylation,GO:0007162~negative regulation of cell adhesion,GO:0007229~integrin-mediated signaling pathway,GO:0007566~embryo implantation,GO:0010628~positive regulation of gene expression,GO:0010952~positive regulation of peptidase activity,GO:0016032~viral process,GO:0030198~extracellular matrix organization,GO:0048146~positive regulation of fibrobla…	GO:0005576~extracellular region,GO:0005577~fibrinogen complex,GO:0005578~proteinaceous extracellular matrix,GO:0005604~basement membrane,GO:0005615~extracellular space,GO:0005622~intracellular,GO:0031012~extracellular matrix,GO:0070062~extracellular exosome,GO:0071953~elastic fiber,	GO:0001968~fibronectin binding,GO:0005178~integrin binding,GO:0005201~extracellular matrix structural constituent,GO:0005509~calcium ion binding,GO:0008022~protein C-terminus binding,GO:0016504~peptidase activator activity,GO:0032403~protein complex binding,GO:0042802~identical protein binding,GO:0070051~fibrinogen binding,				0.171503		0.0881508	0.913789								0.849406	0.143152				10.8569	10.1611				10.7048	10.5595	10.5271				11.0764	12.1651	11.0982
P23229;C9JXX7;H7BZ97	ITGA6	Integrin alpha-6;Integrin alpha-6 heavy chain;Integrin alpha-6 light chain;Processed integrin alpha-6	GO:0007044~cell-substrate junction assembly,GO:0007155~cell adhesion,GO:0007160~cell-matrix adhesion,GO:0007229~integrin-mediated signaling pathway,GO:0010668~ectodermal cell differentiation,GO:0010811~positive regulation of cell-substrate adhesion,GO:0016337~single organismal cell-cell adhesion,GO:0022409~positive regulation of cell-cell adhesion,GO:0030198~extracellular matrix organization,GO:0…	GO:0005604~basement membrane,GO:0005886~plasma membrane,GO:0005913~cell-cell adherens junction,GO:0005925~focal adhesion,GO:0008305~integrin complex,GO:0009897~external side of plasma membrane,GO:0009925~basal plasma membrane,GO:0009986~cell surface,GO:0016021~integral component of membrane,GO:0030056~hemidesmosome,GO:0030175~filopodium,GO:0034676~integrin alpha6-beta4 complex,	GO:0005178~integrin binding,GO:0005515~protein binding,GO:0031994~insulin-like growth factor I binding,GO:0038132~neuregulin binding,GO:0043236~laminin binding,GO:0046872~metal ion binding,GO:0098641~cadherin binding involved in cell-cell adhesion,				0.363993		0.626575	0.324767								-0.404396	0.44713				11.1679	11.1674				11.797	11.4196	12.166				10.9264	11.3172	11.9259
P25311	AZGP1	Zinc-alpha-2-glycoprotein	GO:0001580~detection of chemical stimulus involved in sensory perception of bitter taste,GO:0001895~retina homeostasis,GO:0007155~cell adhesion,GO:0008285~negative regulation of cell proliferation,GO:0019882~antigen processing and presentation,GO:0055085~transmembrane transport,GO:0071806~protein transmembrane transport,GO:0090501~RNA phosphodiester bond hydrolysis,	GO:0005576~extracellular region,GO:0005615~extracellular space,GO:0005634~nucleus,GO:0005886~plasma membrane,GO:0070062~extracellular exosome,	GO:0001948~glycoprotein binding,GO:0003823~antigen binding,GO:0004540~ribonuclease activity,GO:0005515~protein binding,GO:0008320~protein transmembrane transporter activity,			+	0.9816		0.215692	0.879874		0.199524	0.906164		-0.016168	0.987997					13.4943	10.1668			12.8441	11.23	12.0646				11.7829	11.8321	12.4752
V9GZ54;P26038	MSN	Moesin	GO:0006928~movement of cell or subcellular component,GO:0007010~cytoskeleton organization,GO:0007159~leukocyte cell-cell adhesion,GO:0008360~regulation of cell shape,GO:0008361~regulation of cell size,GO:0010628~positive regulation of gene expression,GO:0022612~gland morphogenesis,GO:0022614~membrane to membrane docking,GO:0045198~establishment of epithelial cell apical/basal polarity,GO:0050900~…	GO:0001931~uropod,GO:0005615~extracellular space,GO:0005634~nucleus,GO:0005737~cytoplasm,GO:0005856~cytoskeleton,GO:0005886~plasma membrane,GO:0005902~microvillus,GO:0005925~focal adhesion,GO:0016323~basolateral plasma membrane,GO:0016324~apical plasma membrane,GO:0019898~extrinsic component of membrane,GO:0030175~filopodium,GO:0031143~pseudopodium,GO:0031528~microvillus membrane,GO:0031982~vesic…	GO:0003725~double-stranded RNA binding,GO:0003779~actin binding,GO:0005102~receptor binding,GO:0005200~structural constituent of cytoskeleton,GO:0005515~protein binding,GO:0019901~protein kinase binding,GO:0050839~cell adhesion molecule binding,	+
P27105;F8VSL7	STOM	Erythrocyte band 7 integral membrane protein	GO:0044829~positive regulation by host of viral genome replication,GO:0051260~protein homooligomerization,GO:0090314~positive regulation of protein targeting to membrane,GO:1901585~regulation of acid-sensing ion channel activity,	GO:0005615~extracellular space,GO:0005737~cytoplasm,GO:0005739~mitochondrion,GO:0005783~endoplasmic reticulum,GO:0005856~cytoskeleton,GO:0005887~integral component of plasma membrane,GO:0016020~membrane,GO:0031982~vesicle,GO:0042470~melanosome,GO:0045121~membrane raft,GO:0048471~perinuclear region of cytoplasm,GO:0070062~extracellular exosome,GO:0072562~blood microparticle,	GO:0005515~protein binding,GO:0042803~protein homodimerization activity,GO:0070063~RNA polymerase binding,				0.000118674	+	2.58032	3.96904e-06	+	0.500256	0.323848		-2.08007	0.000172156	+	-1.10745	0.0200498		13.3191	14.0031	13.1941	12.8752	15.7644	15.6975	16.5162	16.1105	15.2999	16.1806	13.7351	13.4931	14.3161	14.8107	14.9959	14.6555
P27169;F8WF42	PON1	Serum paraoxonase/arylesterase 1	GO:0008203~cholesterol metabolic process,GO:0009605~response to external stimulus,GO:0009636~response to toxic substance,GO:0010875~positive regulation of cholesterol efflux,GO:0016311~dephosphorylation,GO:0019439~aromatic compound catabolic process,GO:0031667~response to nutrient levels,GO:0032411~positive regulation of transporter activity,GO:0034445~negative regulation of plasma lipoprotein pa…	GO:0005576~extracellular region,GO:0005615~extracellular space,GO:0034364~high-density lipoprotein particle,GO:0034366~spherical high-density lipoprotein particle,GO:0043231~intracellular membrane-bounded organelle,GO:0070062~extracellular exosome,GO:0072562~blood microparticle,	GO:0004063~aryldialkylphosphatase activity,GO:0004064~arylesterase activity,GO:0005509~calcium ion binding,GO:0005543~phospholipid binding,GO:0042803~protein homodimerization activity,GO:0102007~acyl-L-homoserine-lactone lactonohydrolase activity,			+	0.126009		-0.385371	0.407322		-0.543102	0.326979		-0.157731	0.783838		-0.619692	0.185876		16.2832	15.1069	16.4283	15.0053	15.4416	14.8326	15.4364	15.6082	14.9533	15.6513	15.3175	15.1843	14.9867	14.7407	14.7362	14.6256
P30273	FCER1G	High affinity immunoglobulin epsilon receptor subunit gamma	GO:0001798~positive regulation of type IIa hypersensitivity,GO:0001805~positive regulation of type III hypersensitivity,GO:0001812~positive regulation of type I hypersensitivity,GO:0002223~stimulatory C-type lectin receptor signaling pathway,GO:0002283~neutrophil activation involved in immune response,GO:0002292~T cell differentiation involved in immune response,GO:0002431~Fc receptor mediated st…	GO:0005886~plasma membrane,GO:0005887~integral component of plasma membrane,GO:0009897~external side of plasma membrane,GO:0009986~cell surface,GO:0016021~integral component of membrane,GO:0032998~Fc-epsilon receptor I complex,	GO:0005515~protein binding,GO:0019767~IgE receptor activity,GO:0019863~IgE binding,GO:0019864~IgG binding,				0.0507455		2.71343	0.0139431								-1.48549	0.0507611					10.1553				13.023	12.512	13.0711				10.5996	11.8719	11.6781
P31151	S100A7	Protein S100-A7	GO:0000302~response to reactive oxygen species,GO:0001525~angiogenesis,GO:0008544~epidermis development,GO:0010820~positive regulation of T cell chemotaxis,GO:0030216~keratinocyte differentiation,GO:0032496~response to lipopolysaccharide,GO:0045087~innate immune response,GO:0050829~defense response to Gram-negative bacterium,GO:0051238~sequestering of metal ion,GO:0070374~positive regulation of E…	GO:0005576~extracellular region,GO:0005634~nucleus,GO:0005737~cytoplasm,GO:0005783~endoplasmic reticulum,GO:0005829~cytosol,GO:0005925~focal adhesion,GO:0070062~extracellular exosome,	GO:0005509~calcium ion binding,GO:0005515~protein binding,GO:0008270~zinc ion binding,GO:0050786~RAGE receptor binding,				0.325677		-0.863444	0.233054		-0.337609	0.664592		0.525835	0.437582					13.053	11.5807			11.5102	11.3467	11.5033				11.7614	11.8477	12.3286
P31947	SFN	14-3-3 protein sigma	GO:0000079~regulation of cyclin-dependent protein serine/threonine kinase activity,GO:0001836~release of cytochrome c from mitochondria,GO:0003334~keratinocyte development,GO:0006469~negative regulation of protein kinase activity,GO:0006977~DNA damage response, signal transduction by p53 class mediator resulting in cell cycle arrest,GO:0007165~signal transduction,GO:0008630~intrinsic apoptotic si…	GO:0005615~extracellular space,GO:0005634~nucleus,GO:0005737~cytoplasm,GO:0005739~mitochondrion,GO:0005829~cytosol,GO:0005913~cell-cell adherens junction,GO:0030659~cytoplasmic vesicle membrane,GO:0070062~extracellular exosome,	GO:0005515~protein binding,GO:0008426~protein kinase C inhibitor activity,GO:0019901~protein kinase binding,GO:0019904~protein domain specific binding,GO:0042802~identical protein binding,GO:0051219~phosphoprotein binding,GO:0098641~cadherin binding involved in cell-cell adhesion,				0.0143668		2.25729	0.00468018	+	1.07898	0.241922		-1.17832	0.106974		1.05561	0.147851		11.7675	11.6114		10.975	12.9584	13.6979	13.2599	13.6277	14.668	14.0398	11.3481	11.8814	14.3614	14.1569	15.4011	14.7347
P35579	MYH9	Myosin-9	GO:0000212~meiotic spindle organization,GO:0000904~cell morphogenesis involved in differentiation,GO:0000910~cytokinesis,GO:0001525~angiogenesis,GO:0001701~in utero embryonic development,GO:0001768~establishment of T cell polarity,GO:0006509~membrane protein ectodomain proteolysis,GO:0006911~phagocytosis, engulfment,GO:0007229~integrin-mediated signaling pathway,GO:0007520~myoblast fusion,GO:0008…	GO:0001725~stress fiber,GO:0001726~ruffle,GO:0001772~immunological synapse,GO:0001931~uropod,GO:0005634~nucleus,GO:0005737~cytoplasm,GO:0005819~spindle,GO:0005826~actomyosin contractile ring,GO:0005829~cytosol,GO:0005886~plasma membrane,GO:0005903~brush border,GO:0005913~cell-cell adherens junction,GO:0005925~focal adhesion,GO:0008180~COP9 signalosome,GO:0008305~integrin complex,GO:0015629~actin …	GO:0000146~microfilament motor activity,GO:0003774~motor activity,GO:0003779~actin binding,GO:0005515~protein binding,GO:0005516~calmodulin binding,GO:0005524~ATP binding,GO:0016887~ATPase activity,GO:0019904~protein domain specific binding,GO:0030898~actin-dependent ATPase activity,GO:0042803~protein homodimerization activity,GO:0043495~protein anchor,GO:0043531~ADP binding,GO:0044822~poly(A) RN…	+			0.0141191		0.658924	0.389304								2.24312	0.00923418	+			12.7557	12.0099				12.8511	13.4018	12.8723				14.9048	16.0206	14.929
X6RJP6;P37802	TAGLN2	Transgelin-2	GO:0030855~epithelial cell differentiation,GO:0098609~cell-cell adhesion,	GO:0005913~cell-cell adherens junction,GO:0031982~vesicle,GO:0070062~extracellular exosome,	GO:0005515~protein binding,GO:0098641~cadherin binding involved in cell-cell adhesion,				0.0226258		-0.0180142	0.981035								1.67417	0.0179079				10.6394	10.7981				10.6186	10.4571	11.0265				12.4327	12.8991	11.793
P43652	AFM	Afamin	GO:0051180~vitamin transport,	GO:0005576~extracellular region,GO:0005615~extracellular space,GO:0070062~extracellular exosome,GO:0072562~blood microparticle,	GO:0008431~vitamin E binding,			+	0.286843		1.39635	0.200186								0.345559	0.655767					10.2559				11.7469	11.8477	11.3623				12.6957	12.3931	10.9047
P55056	APOC4	Apolipoprotein C-IV	GO:0006629~lipid metabolic process,GO:0006869~lipid transport,GO:0010890~positive regulation of sequestering of triglyceride,GO:0070328~triglyceride homeostasis,	GO:0034361~very-low-density lipoprotein particle,GO:0034364~high-density lipoprotein particle,	GO:0005319~lipid transporter activity,			+	0.000491297	+	-3.49411	1.23574e-05	+	-4.02465	2.44789e-05	+	-0.530533	0.472992		-0.311509	0.668246		17.3726	16.7945	18.1546	16.9655	15.038	14.1903	14.5181	13.3645	12.3913	13.4639	13.1715	13.3234	13.3966	14.0566	12.5528	13.9391
P60174;U3KPZ0	TPI1	Triosephosphate isomerase	GO:0006094~gluconeogenesis,GO:0006096~glycolytic process,GO:0006098~pentose-phosphate shunt,GO:0007275~multicellular organism development,GO:0019563~glycerol catabolic process,GO:0046166~glyceraldehyde-3-phosphate biosynthetic process,GO:0061621~canonical glycolysis,	GO:0005615~extracellular space,GO:0005634~nucleus,GO:0005829~cytosol,GO:0070062~extracellular exosome,	GO:0004807~triose-phosphate isomerase activity,GO:0005515~protein binding,GO:0031625~ubiquitin protein ligase binding,	+			0.0191497		0.00333884	0.994823								1.31079	0.0280741					11.631				11.8203	11.2686	11.8141				12.8769	12.9039	13.0545
P60953	CDC42	Cell division control protein 42 homolog	GO:0002040~sprouting angiogenesis,GO:0003161~cardiac conduction system development,GO:0003334~keratinocyte development,GO:0006897~endocytosis,GO:0007030~Golgi organization,GO:0007088~regulation of mitotic nuclear division,GO:0007097~nuclear migration,GO:0007163~establishment or maintenance of cell polarity,GO:0007264~small GTPase mediated signal transduction,GO:0007596~blood coagulation,GO:001062…	GO:0000139~Golgi membrane,GO:0000322~storage vacuole,GO:0005622~intracellular,GO:0005737~cytoplasm,GO:0005789~endoplasmic reticulum membrane,GO:0005815~microtubule organizing center,GO:0005829~cytosol,GO:0005886~plasma membrane,GO:0005911~cell-cell junction,GO:0005925~focal adhesion,GO:0016020~membrane,GO:0030141~secretory granule,GO:0030175~filopodium,GO:0030496~midbody,GO:0031256~leading edge m…	GO:0003924~GTPase activity,GO:0005515~protein binding,GO:0005525~GTP binding,GO:0019901~protein kinase binding,GO:0030742~GTP-dependent protein binding,GO:0031435~mitogen-activated protein kinase kinase kinase binding,GO:0031996~thioesterase binding,GO:0034191~apolipoprotein A-I receptor binding,GO:0042802~identical protein binding,GO:0051022~Rho GDP-dissociation inhibitor binding,GO:0061630~ubiq…	+			0.567334											0.165075	0.793383									10.5327	10.5145	11.0397				10.5761	10.9501	11.0559
P61026	RAB10	Ras-related protein Rab-10	GO:0006893~Golgi to plasma membrane transport,GO:0007264~small GTPase mediated signal transduction,GO:0007409~axonogenesis,GO:0016192~vesicle-mediated transport,GO:0016197~endosomal transport,GO:0019882~antigen processing and presentation,GO:0030859~polarized epithelial cell differentiation,GO:0032869~cellular response to insulin stimulus,GO:0043001~Golgi to plasma membrane protein transport,GO:0…	GO:0000139~Golgi membrane,GO:0000145~exocyst,GO:0005622~intracellular,GO:0005768~endosome,GO:0005789~endoplasmic reticulum membrane,GO:0005794~Golgi apparatus,GO:0005802~trans-Golgi network,GO:0005886~plasma membrane,GO:0005911~cell-cell junction,GO:0005913~cell-cell adherens junction,GO:0005925~focal adhesion,GO:0005929~cilium,GO:0030659~cytoplasmic vesicle membrane,GO:0030670~phagocytic vesicle…	GO:0003924~GTPase activity,GO:0005515~protein binding,GO:0005525~GTP binding,GO:0019003~GDP binding,GO:0031489~myosin V binding,GO:0098641~cadherin binding involved in cell-cell adhesion,	+			0.235352		0.415932	0.381448		0.393567	0.502908		-0.0223649	0.968829		0.436894	0.301591		11.3149	10.7196		10.5975	11.3862	10.9674	11.5801	11.7288	10.6245	11.4726	11.1939	10.8013	11.8174	11.3551	12.1121	11.7233
P61224;E7ESV4;F5H7Y6;A6NIZ1;B7ZB78;A0A075B6Q0;F5GYB5;F5GX62;P62834;F5H4H0;F5GYH7;F5H077;F5GWU8;F5H491;F5H0B7;F5H500;F5H823;F5GZG1;F5H6R7;F5H004;F8WBC0	RAP1B;RAP1A	Ras-related protein Rap-1b;Ras-related protein Rap-1b-like protein;Ras-related protein Rap-1A	GO:0007264~small GTPase mediated signal transduction,GO:0008283~cell proliferation,GO:0009743~response to carbohydrate,GO:0030033~microvillus assembly,GO:0032486~Rap protein signal transduction,GO:0035690~cellular response to drug,GO:0061028~establishment of endothelial barrier,GO:0070374~positive regulation of ERK1 and ERK2 cascade,GO:0071320~cellular response to cAMP,GO:0071407~cellular respons…	GO:0005622~intracellular,GO:0005811~lipid particle,GO:0005829~cytosol,GO:0005886~plasma membrane,GO:0005911~cell-cell junction,GO:0016020~membrane,GO:0045121~membrane raft,GO:0070062~extracellular exosome,,GO:0005622~intracellular,GO:0005737~cytoplasm,GO:0005769~early endosome,GO:0005770~late endosome,GO:0005829~cytosol,GO:0005886~plasma membrane,GO:0016020~membrane,GO:0030054~cell junction,GO:00…	GO:0003924~GTPase activity,GO:0005515~protein binding,GO:0005525~GTP binding,GO:0019003~GDP binding,GO:0032403~protein complex binding,	+			0.0238569		1.932	0.0173044		0.243267	0.839184		-1.68874	0.0321218		0.819723	0.269821		12.088	12.7883		12.9295	14.3433	13.8795	15.0355	14.6427	14.2547	15.0478	11.9245	11.6028	15.0083	14.7871	15.8372	15.4366
P61981	YWHAG	14-3-3 protein gamma;14-3-3 protein gamma, N-terminally processed	GO:0000086~G2/M transition of mitotic cell cycle,GO:0006469~negative regulation of protein kinase activity,GO:0006605~protein targeting,GO:0009966~regulation of signal transduction,GO:0032869~cellular response to insulin stimulus,GO:0045664~regulation of neuron differentiation,GO:0048167~regulation of synaptic plasticity,GO:0061024~membrane organization,GO:0071901~negative regulation of protein s…	GO:0005739~mitochondrion,GO:0005829~cytosol,GO:0005925~focal adhesion,GO:0016020~membrane,GO:0030659~cytoplasmic vesicle membrane,GO:0043209~myelin sheath,GO:0070062~extracellular exosome,	GO:0005080~protein kinase C binding,GO:0005159~insulin-like growth factor receptor binding,GO:0005515~protein binding,GO:0008426~protein kinase C inhibitor activity,GO:0019904~protein domain specific binding,GO:0030971~receptor tyrosine kinase binding,GO:0044822~poly(A) RNA binding,	+			0.0572184		0.470128	0.575827								1.42106	0.050996				10.8558	10.3348				10.6412	11.4473	11.1078				11.7672	13.206	12.4862
P62258;K7EM20	YWHAE	14-3-3 protein epsilon	GO:0000086~G2/M transition of mitotic cell cycle,GO:0001764~neuron migration,GO:0003064~regulation of heart rate by hormone,GO:0006605~protein targeting,GO:0016032~viral process,GO:0021762~substantia nigra development,GO:0021766~hippocampus development,GO:0021987~cerebral cortex development,GO:0035308~negative regulation of protein dephosphorylation,GO:0035329~hippo signaling,GO:0035556~intracell…	GO:0005739~mitochondrion,GO:0005829~cytosol,GO:0005871~kinesin complex,GO:0005913~cell-cell adherens junction,GO:0005925~focal adhesion,GO:0016020~membrane,GO:0030424~axon,GO:0030659~cytoplasmic vesicle membrane,GO:0042470~melanosome,GO:0070062~extracellular exosome,	GO:0005515~protein binding,GO:0015459~potassium channel regulator activity,GO:0019899~enzyme binding,GO:0019904~protein domain specific binding,GO:0023026~MHC class II protein complex binding,GO:0031625~ubiquitin protein ligase binding,GO:0042826~histone deacetylase binding,GO:0044325~ion channel binding,GO:0044822~poly(A) RNA binding,GO:0046982~protein heterodimerization activity,GO:0050815~phos…	+			0.846677		0.222959	0.789562		0.388403	0.638587		0.165443	0.833889					12.5657	10.7256			11.7677	11.773	12.0652				11.9339	11.6843	12.484
P63104;E7EX29;B0AZS6;B7Z2E6;H0YB80;E7ESK7;E5RIR4;E9PD24;E7EVZ2;P27348;P31946;E5RGE1;Q4VY20;A0A0J9YWZ2;B4DJF2;Q4VY19;I3L3T1;K7EIT4;E9PG15;A0A0J9YWE8;A2IDB2	YWHAZ	14-3-3 protein zeta/delta	GO:0006605~protein targeting,GO:0007165~signal transduction,GO:0010941~regulation of cell death,GO:0030168~platelet activation,GO:0043066~negative regulation of apoptotic process,GO:0043488~regulation of mRNA stability,GO:0051683~establishment of Golgi localization,GO:0061024~membrane organization,GO:0090168~Golgi reassembly,GO:0098609~cell-cell adhesion,GO:1900740~positive regulation of protein …	GO:0005615~extracellular space,GO:0005634~nucleus,GO:0005654~nucleoplasm,GO:0005737~cytoplasm,GO:0005739~mitochondrion,GO:0005829~cytosol,GO:0005913~cell-cell adherens junction,GO:0005925~focal adhesion,GO:0030659~cytoplasmic vesicle membrane,GO:0042470~melanosome,GO:0070062~extracellular exosome,GO:0072562~blood microparticle,	GO:0004497~monooxygenase activity,GO:0005515~protein binding,GO:0008134~transcription factor binding,GO:0016301~kinase activity,GO:0019901~protein kinase binding,GO:0019904~protein domain specific binding,GO:0031625~ubiquitin protein ligase binding,GO:0042802~identical protein binding,GO:0044822~poly(A) RNA binding,GO:0098641~cadherin binding involved in cell-cell adhesion,	+			0.126009		-0.125656	0.899635		-1.03512	0.316926		-0.909466	0.310699		1.55798	0.0772418		14.1093	12.8238	14.9569	14.3001	12.7739	13.2257	13.5806	14.7797	14.5983	14.5731	12.236	11.8092	14.992	14.9327	16.0349	15.4719
P68871;A0A2R8Y7R2;F8W6P5;A0A0J9YWK4;P02042;C9JRG0;E9PEW8;E9PFT6	HBB	Hemoglobin subunit beta;LVV-hemorphin-7;Spinorphin	GO:0006898~receptor-mediated endocytosis,GO:0007596~blood coagulation,GO:0008217~regulation of blood pressure,GO:0010942~positive regulation of cell death,GO:0015671~oxygen transport,GO:0015701~bicarbonate transport,GO:0030185~nitric oxide transport,GO:0042542~response to hydrogen peroxide,GO:0042744~hydrogen peroxide catabolic process,GO:0045429~positive regulation of nitric oxide biosynthetic p…	GO:0005576~extracellular region,GO:0005829~cytosol,GO:0005833~hemoglobin complex,GO:0016021~integral component of membrane,GO:0031838~haptoglobin-hemoglobin complex,GO:0070062~extracellular exosome,GO:0071682~endocytic vesicle lumen,GO:0072562~blood microparticle,	GO:0004601~peroxidase activity,GO:0005344~oxygen transporter activity,GO:0005506~iron ion binding,GO:0005515~protein binding,GO:0019825~oxygen binding,GO:0020037~heme binding,GO:0030492~hemoglobin binding,GO:0031720~haptoglobin binding,				0.184681		-0.897447	0.082855		-0.116271	0.891414		0.781176	0.165974		0.24996	0.674714		15.6552	14.2045	15.4893	14.093	14.0264	14.4607	14.0634	13.8626	13.8052	13.5602	15.3606	15.1303	13.7419	14.3991	14.3363	13.9038
P80108	GPLD1	Phosphatidylinositol-glycan-specific phospholipase D	GO:0001503~ossification,GO:0002042~cell migration involved in sprouting angiogenesis,GO:0002062~chondrocyte differentiation,GO:0002430~complement receptor mediated signaling pathway,GO:0006507~GPI anchor release,GO:0008285~negative regulation of cell proliferation,GO:0008286~insulin receptor signaling pathway,GO:0009749~response to glucose,GO:0010595~positive regulation of endothelial cell migrat…	GO:0005578~proteinaceous extracellular matrix,GO:0005615~extracellular space,GO:0005622~intracellular,GO:0005737~cytoplasm,GO:0005765~lysosomal membrane,GO:0043231~intracellular membrane-bounded organelle,GO:0070062~extracellular exosome,	GO:0004621~glycosylphosphatidylinositol phospholipase D activity,GO:0004630~phospholipase D activity,GO:0017080~sodium channel regulator activity,			+	0.444891		-0.287482	0.654631		0.0159023	0.977094		0.303384	0.572401					13.1827	12.7794			12.7324	12.4725	12.8759				13.2216	13.1024	12.667
P81605	DCD	Dermcidin;Survival-promoting peptide;DCD-1	GO:0006508~proteolysis,GO:0031640~killing of cells of other organism,GO:0042742~defense response to bacterium,GO:0050832~defense response to fungus,	GO:0005576~extracellular region,GO:0005615~extracellular space,GO:0031012~extracellular matrix,GO:0070062~extracellular exosome,	GO:0005515~protein binding,GO:0008233~peptidase activity,GO:0044822~poly(A) RNA binding,				0.126009		-1.38222	0.0616011		-0.892363	0.340196		0.489858	0.579463		-0.595975	0.454533		16.367	13.9102	16.6276	13.9049	14.7453	12.8595	14.2954	13.27	13.4547	14.2963	14.0682	14.1656	14.6963	13.8467	12.9287	12.8973
P9WGY7	rpoC						+
P9WKB5	Rv2285						+		0.489509		-0.272105	0.703772								-0.0364488	0.949923				13.9121	14.4037				13.9788	13.7578	13.9208				13.71	14.1766	13.6615
Q01518;Q5T0R7;Q5T0R6;Q5T0R5;Q5T0R4;Q5T0R3;Q5T0R2;Q5T0R1;Q5T0R9;Q5T0R8;Q5T0S3	CAP1	Adenylyl cyclase-associated protein 1	GO:0000902~cell morphogenesis,GO:0001667~ameboidal-type cell migration,GO:0006898~receptor-mediated endocytosis,GO:0007163~establishment or maintenance of cell polarity,GO:0007165~signal transduction,GO:0007190~activation of adenylate cyclase activity,GO:0008154~actin polymerization or depolymerization,GO:0030036~actin cytoskeleton organization,	GO:0005886~plasma membrane,GO:0005925~focal adhesion,GO:0030864~cortical actin cytoskeleton,GO:0070062~extracellular exosome,	GO:0003779~actin binding,GO:0008179~adenylate cyclase binding,	+			0.0764473		1.35433	0.0566056		0.562448	0.509268		-0.791884	0.187032		0.479733	0.423213				11.737	11.4468	13.0919	11.8134	13.2351	13.6162	12.2932	13.6277	11.8307	11.7747	12.8577	13.0223	14.0727	13.183
Q04917;F8WEB6;A2IDB1	YWHAH	14-3-3 protein eta	GO:0002028~regulation of sodium ion transport,GO:0006713~glucocorticoid catabolic process,GO:0006886~intracellular protein transport,GO:0021762~substantia nigra development,GO:0042921~glucocorticoid receptor signaling pathway,GO:0045664~regulation of neuron differentiation,GO:0045893~positive regulation of transcription, DNA-templated,GO:0048167~regulation of synaptic plasticity,GO:0050774~negati…	GO:0005737~cytoplasm,GO:0005739~mitochondrion,GO:0005829~cytosol,GO:0005886~plasma membrane,GO:0014704~intercalated disc,GO:0030659~cytoplasmic vesicle membrane,GO:0070062~extracellular exosome,	GO:0003779~actin binding,GO:0004497~monooxygenase activity,GO:0005159~insulin-like growth factor receptor binding,GO:0005515~protein binding,GO:0017080~sodium channel regulator activity,GO:0019899~enzyme binding,GO:0019904~protein domain specific binding,GO:0035259~glucocorticoid receptor binding,GO:0044325~ion channel binding,GO:0046982~protein heterodimerization activity,				0.0167026		3.634	0.000982565	+							-0.86813	0.138903					7.7912				10.8411	11.4544	11.9801				10.4682	10.6448	10.5582
Q08380;K7EP36;K7ESM3;K7EKQ5;K7ERZ6;K7EJD3;K7EQT9;K7ES75;K7EN99;K7EJY8	LGALS3BP	Galectin-3-binding protein	GO:0002576~platelet degranulation,GO:0006898~receptor-mediated endocytosis,GO:0006968~cellular defense response,GO:0007155~cell adhesion,GO:0007165~signal transduction,	GO:0005576~extracellular region,GO:0005578~proteinaceous extracellular matrix,GO:0005615~extracellular space,GO:0016020~membrane,GO:0031012~extracellular matrix,GO:0031089~platelet dense granule lumen,GO:0070062~extracellular exosome,GO:0072562~blood microparticle,	GO:0005044~scavenger receptor activity,	+		+	0.31604		0.310149	0.447083		0.608651	0.201645		0.298502	0.485794		-0.141122	0.744278		17.3622	17.5606	17.0619	17.5814	17.3205	18.2387	17.394	17.6699	18.1203	17.4667	18.224	18.2514	17.5252	17.0354	17.8252	17.8211
Q10884	hycE						+		0.0167026		-0.480657	0.381448		1.52026	0.0169016		2.00091	0.00190405	+	0.301704	0.598564		12.3376	13.0578	12.0155	12.1039	11.7789	12.0761	12.197	11.7613	11.5408	12.0342	14.5738	14.5731	12.5499	12.5462	12.5058	11.5472
Q13093	PLA2G7	Platelet-activating factor acetylhydrolase	GO:0016042~lipid catabolic process,GO:0034374~low-density lipoprotein particle remodeling,GO:0034440~lipid oxidation,GO:0034441~plasma lipoprotein particle oxidation,GO:0046469~platelet activating factor metabolic process,GO:0050729~positive regulation of inflammatory response,GO:0090026~positive regulation of monocyte chemotaxis,	GO:0005576~extracellular region,GO:0005737~cytoplasm,GO:0034362~low-density lipoprotein particle,	GO:0003847~1-alkyl-2-acetylglycerophosphocholine esterase activity,GO:0005543~phospholipid binding,GO:0016788~hydrolase activity, acting on ester bonds,GO:0047499~calcium-independent phospholipase A2 activity,			+	0.475398		-0.8269	0.273506		-0.477922	0.541151		0.348979	0.616631					12.4792	14.1485			12.4319	12.7273	12.3015				12.8747	13.2411	12.3919
Q13201;E7EPG1	MMRN1	Multimerin-1;Platelet glycoprotein Ia*;155 kDa platelet multimerin	GO:0002576~platelet degranulation,GO:0007155~cell adhesion,GO:0007596~blood coagulation,	GO:0005576~extracellular region,GO:0031012~extracellular matrix,GO:0031093~platelet alpha granule lumen,	GO:0005509~calcium ion binding,GO:0005515~protein binding,				0.00503913	+	1.46127	0.00147994	+	0.851526	0.101728		-0.609741	0.182272		0.274935	0.562843		15.6415	15.5422	15.3017	14.9969	17.0016	16.6603	16.9565	16.9931	16.4316	16.9479	15.7958	15.606	17.2645	16.7724	17.3263	17.2216
Q13790	APOF	Apolipoprotein F	GO:0006629~lipid metabolic process,GO:0006869~lipid transport,GO:0008203~cholesterol metabolic process,	GO:0005576~extracellular region,GO:0034362~low-density lipoprotein particle,GO:0034364~high-density lipoprotein particle,	GO:0005102~receptor binding,GO:0005319~lipid transporter activity,GO:0015485~cholesterol binding,			+	0.166255		1.29791	0.082855		0.812248	0.310695		-0.485659	0.474376					12.3367	13.4358			13.765	14.8755	13.9121				13.5733	13.675	13.8473
Q15075	EEA1	Early endosome antigen 1	GO:0006897~endocytosis,GO:0006906~vesicle fusion,GO:0016189~synaptic vesicle to endosome fusion,GO:0039694~viral RNA genome replication,GO:0045022~early endosome to late endosome transport,	GO:0005737~cytoplasm,GO:0005769~early endosome,GO:0005829~cytosol,GO:0005969~serine-pyruvate aminotransferase complex,GO:0016020~membrane,GO:0019897~extrinsic component of plasma membrane,GO:0031410~cytoplasmic vesicle,GO:0031901~early endosome membrane,GO:0044308~axonal spine,GO:0055037~recycling endosome,GO:0070062~extracellular exosome,GO:0098793~presynapse,	GO:0005515~protein binding,GO:0005516~calmodulin binding,GO:0005545~1-phosphatidylinositol binding,GO:0008270~zinc ion binding,GO:0030742~GTP-dependent protein binding,GO:0042803~protein homodimerization activity,GO:0046872~metal ion binding,
Q5SZB4	C9orf50	Uncharacterized protein C9orf50							0.0167026		0.446612	0.51055		2.04106	0.00521985	+	1.59445	0.00900062	+				12.5005	12.3658			12.965	13.0637	12.6107				14.9614	14.5956	13.8657
Q68CQ4	DIEXF	Digestive organ expansion factor homolog	GO:0000462~maturation of SSU-rRNA from tricistronic rRNA transcript (SSU-rRNA, 5.8S rRNA, LSU-rRNA),GO:0006364~rRNA processing,GO:0007275~multicellular organism development,	GO:0005634~nucleus,GO:0005654~nucleoplasm,GO:0005730~nucleolus,GO:0032040~small-subunit processome,	GO:0005515~protein binding,GO:0019843~rRNA binding,GO:0034511~U3 snoRNA binding,GO:0044822~poly(A) RNA binding,				0.479583		0.105176	0.879874		0.630831	0.403372		0.525654	0.433745		0.65629	0.269915		13.4815	12.1344	13.1956	11.3038	12.6867	12.9067	12.6637	12.2205	12.8871	12.4393	12.5239	13.6014	13.3536	14.373	12.4736	13.0242
Q68D42	TMEM215	Transmembrane protein 215		GO:0016021~integral component of membrane,					0.00184097		0.279781	0.669859								-2.71743	0.00030587	+			14.3624	14.015				14.0896	14.5519	14.7639				12.0089	11.674	11.5703
Q6P4Q7;Q9H8M5	CNNM4;CNNM2	Metal transporter CNNM4;Metal transporter CNNM2	GO:0007601~visual perception,GO:0010960~magnesium ion homeostasis,GO:0015693~magnesium ion transport,GO:0035725~sodium ion transmembrane transport,GO:0050896~response to stimulus,GO:0070166~enamel mineralization,GO:1903830~magnesium ion transmembrane transport,,GO:0010960~magnesium ion homeostasis,GO:0015693~magnesium ion transport,GO:1903830~magnesium ion transmembrane transport,	GO:0016021~integral component of membrane,GO:0016323~basolateral plasma membrane,,GO:0016021~integral component of membrane,GO:0016323~basolateral plasma membrane,	GO:0015081~sodium ion transmembrane transporter activity,GO:0015095~magnesium ion transmembrane transporter activity,				0.0195333		-0.724845	0.115443		0.753286	0.188387		1.47813	0.00328669	+	0.551036	0.22109			12.1502	11.2683	11.9051	11.2797	11.1138	11.2665	11.1018	10.653	10.8834	12.9714	12.9163	11.6958	11.4065	12.1428	11.2529
Q7Z7F0	KIAA0907	UPF0469 protein KIAA0907		GO:0005634~nucleus,	GO:0003723~RNA binding,GO:0005515~protein binding,
Q86UX7;F5H1C6	FERMT3	Fermitin family homolog 3	GO:0007159~leukocyte cell-cell adhesion,GO:0007229~integrin-mediated signaling pathway,GO:0030335~positive regulation of cell migration,GO:0033622~integrin activation,GO:0033632~regulation of cell-cell adhesion mediated by integrin,GO:0034446~substrate adhesion-dependent cell spreading,GO:0070527~platelet aggregation,	GO:0002102~podosome,GO:0016020~membrane,GO:0030054~cell junction,GO:0042995~cell projection,GO:0070062~extracellular exosome,	GO:0005178~integrin binding,				0.915112		0.238595	0.76688		0.175065	0.855327		-0.0635297	0.939639					12.7763	12.2932			12.5228	12.5642	13.2331				11.9582	12.6274	13.5439
Q8N9L9	ACOT4	Acyl-coenzyme A thioesterase 4	GO:0000038~very long-chain fatty acid metabolic process,GO:0001676~long-chain fatty acid metabolic process,GO:0006104~succinyl-CoA metabolic process,GO:0006637~acyl-CoA metabolic process,GO:0019605~butyrate metabolic process,GO:0032788~saturated monocarboxylic acid metabolic process,GO:0032789~unsaturated monocarboxylic acid metabolic process,GO:0035338~long-chain fatty-acyl-CoA biosynthetic proc…	GO:0005777~peroxisome,GO:0005782~peroxisomal matrix,	GO:0004778~succinyl-CoA hydrolase activity,GO:0005102~receptor binding,GO:0016290~palmitoyl-CoA hydrolase activity,GO:0047617~acyl-CoA hydrolase activity,GO:0052689~carboxylic ester hydrolase activity,				0.694435		-0.538651	0.67446								0.83815	0.383695				10.9058	9.66603				10.0501	9.32367	9.86804				12.0494	10.6973	9.0096
Q8NEP3	DNAAF1	Dynein assembly factor 1, axonemal	GO:0001947~heart looping,GO:0003341~cilium movement,GO:0003356~regulation of cilium beat frequency,GO:0030324~lung development,GO:0035469~determination of pancreatic left/right asymmetry,GO:0036158~outer dynein arm assembly,GO:0036159~inner dynein arm assembly,GO:0044458~motile cilium assembly,GO:0060271~cilium morphogenesis,GO:0060287~epithelial cilium movement involved in determination of left/…	GO:0000922~spindle pole,GO:0005634~nucleus,GO:0005737~cytoplasm,GO:0005886~plasma membrane,GO:0005930~axoneme,	GO:0045502~dynein binding,				0.286843											1.86935	0.143152									8.613	8.65284	9.51474				13.2236	9.97573	9.18935
Q8NI08	NCOA7	Nuclear receptor coactivator 7	GO:0006351~transcription, DNA-templated,GO:0045944~positive regulation of transcription from RNA polymerase II promoter,	GO:0005622~intracellular,GO:0005634~nucleus,	GO:0005515~protein binding,GO:0030374~ligand-dependent nuclear receptor transcription coactivator activity,GO:0035257~nuclear hormone receptor binding,
R4GND3;Q8WV24	PHLDA1	Pleckstrin homology-like domain family A member 1	GO:0000086~G2/M transition of mitotic cell cycle,GO:0006915~apoptotic process,GO:0045210~FasL biosynthetic process,	GO:0005730~nucleolus,GO:0005829~cytosol,GO:0016023~cytoplasmic, membrane-bounded vesicle,GO:0031410~cytoplasmic vesicle,	GO:0005515~protein binding,				0.291046		-0.761264	0.389304		-0.043374	0.965252		0.71789	0.222786						11.7297			10.9515	10.9761	10.9776				11.0444	12.3115	11.703
Q8WWZ8	OIT3	Oncoprotein-induced transcript 3 protein	GO:1903118~urate homeostasis,	GO:0005635~nuclear envelope,	GO:0005509~calcium ion binding,GO:0005515~protein binding,			+	0.0550515		-1.55332	0.0225277		-1.21048	0.0734514		0.342842	0.572401					14.6792	13.6235			12.6191	12.9159	12.2592				12.9666	12.7118	13.1443
Q92954;J3KP74;E9PLR3	PRG4	Proteoglycan 4;Proteoglycan 4 C-terminal part	GO:0006898~receptor-mediated endocytosis,GO:0006955~immune response,GO:0008283~cell proliferation,	GO:0005576~extracellular region,	GO:0005044~scavenger receptor activity,GO:0030247~polysaccharide binding,				0.0024283	+	-0.206418	0.67446		-1.755	0.00145209	+	-1.54858	0.00221149	+	-0.887645	0.0623619		16.0518	17.0936	16.2633	17.441	16.3083	16.4936	16.0918	16.8246	16.7914	16.5264	14.9244	15.0894	14.8586	15.2308	15.8653	15.759
R4GN71;Q96L03	SPATA17	Spermatogenesis-associated protein 17		GO:0005737~cytoplasm,	GO:0005516~calmodulin binding,				0.00957973	+	-0.896247	0.110808		1.58101	0.0205122		2.47725	0.000803464	+	0.787162	0.192498		12.8213	13.1713	12.7802	13.5174	12.1582	12.0729	12.0184	12.789	12.0005	12.0188	15.3819	15.3975	13.1813	12.4257	13.7312	12.7335
R4GNJ6;Q96P31	FCRL3	Fc receptor-like protein 3		GO:0005886~plasma membrane,GO:0016021~integral component of membrane,					0.286843		1.62082	0.117341		2.17229	0.0842094		0.551469	0.62196		-0.0295561	0.975171			10.402	10.4708	10.5454	10.9861	11.2987	11.511	10.8539	13.9148	13.9967	10.8134	13.6224	13.4992	12.8977	11.8972	11.397
Q9BWP8	COLEC11	Collectin-11	GO:0006508~proteolysis,GO:0006898~receptor-mediated endocytosis,GO:0006956~complement activation,GO:0007275~multicellular organism development,GO:0032502~developmental process,	GO:0005576~extracellular region,GO:0005581~collagen trimer,	GO:0004252~serine-type endopeptidase activity,GO:0005537~mannose binding,			+	0.0888694		1.21379	0.115443		1.2417	0.129148		0.027911	0.968829						11.032			12.3025	12.0956	12.3394				11.9619	12.1456	12.7137
Q9NX76	CMTM6	CKLF-like MARVEL transmembrane domain-containing protein 6	GO:0006935~chemotaxis,	GO:0005615~extracellular space,GO:0016020~membrane,GO:0016021~integral component of membrane,GO:0070062~extracellular exosome,	GO:0005125~cytokine activity,				0.864457		0.119827	0.913789								-0.265695	0.700728					10.261				9.65344	10.6408	10.8482				10.3187	9.63647	10.3901
Q9NZT1	CALML5	Calmodulin-like protein 5	GO:0007165~signal transduction,GO:0008544~epidermis development,	GO:0070062~extracellular exosome,	GO:0005509~calcium ion binding,				0.134074		-1.26122	0.127719								-0.551985	0.440894				15.3806	13.3825				12.9562	12.9814	13.4234				12.6269	12.2879	12.7902
Q9Y490;Q9Y4G6;A0A1B0GVU7;H0YMT1	TLN1	Talin-1	GO:0002576~platelet degranulation,GO:0006928~movement of cell or subcellular component,GO:0006936~muscle contraction,GO:0007016~cytoskeletal anchoring at plasma membrane,GO:0007043~cell-cell junction assembly,GO:0007044~cell-substrate junction assembly,GO:0016032~viral process,GO:0030866~cortical actin cytoskeleton organization,GO:0036498~IRE1-mediated unfolded protein response,GO:0070527~platele…	GO:0001726~ruffle,GO:0005576~extracellular region,GO:0005737~cytoplasm,GO:0005815~microtubule organizing center,GO:0005829~cytosol,GO:0005886~plasma membrane,GO:0005911~cell-cell junction,GO:0005913~cell-cell adherens junction,GO:0005925~focal adhesion,GO:0009986~cell surface,GO:0032587~ruffle membrane,GO:0070062~extracellular exosome,	GO:0005178~integrin binding,GO:0005200~structural constituent of cytoskeleton,GO:0005515~protein binding,GO:0017166~vinculin binding,GO:0030274~LIM domain binding,GO:0051015~actin filament binding,GO:0098641~cadherin binding involved in cell-cell adhesion,	+			0.0601242		0.196204	0.739853		0.0339936	0.965252		-0.16221	0.80911		1.21956	0.038761		16.0937	15.2334	16.6147	15.3553	15.7739	16.0314	16.4949	15.6739	15.8177	16.331	15.1058	15.5385	16.9305	16.8457	17.614	17.2603
Q9Y6Z7	COLEC10	Collectin-10	GO:0006508~proteolysis,GO:0006956~complement activation,	GO:0005576~extracellular region,GO:0005581~collagen trimer,GO:0005737~cytoplasm,	GO:0004252~serine-type endopeptidase activity,GO:0005537~mannose binding,			+	0.182157		-0.834366	0.102646		-0.311995	0.627427		0.522371	0.319497		0.603928	0.22109			10.6061	11.1636	11.1626	10.7502	9.969	10.5354	10.4672	9.12329	10.0134	10.25	10.6404	11.1059	10.3241	10.9997	10.9171
W4VSQ8	NUDT16L1			GO:0005737~cytoplasm,	GO:0005515~protein binding,GO:0016787~hydrolase activity,GO:0030515~snoRNA binding,GO:0042803~protein homodimerization activity,GO:0044822~poly(A) RNA binding,GO:0050072~m7G(5')pppN diphosphatase activity,				0.0238569		0.676178	0.207586								-0.92003	0.0715799				10.6984	10.7982				11.4847	11.2132	11.5755				10.6821	10.6299	10.2013

## Sheet: column descriptions
Column name	description
Uniprot	Unique identifiers in Uniprot knowledgebase of MaxQuant revealed protein groups
gene.names	Corresponding gene names from Uniprot knowledgebase
protein.names	Corresponding protein names from Uniprot knowledgebase
BP_direct	Gene ontology terms of category biological process as retrieved from DAVID database
CC_direct	Gene ontology terms of category cellular component as retrieved from DAVID database
MF_direct	Gene ontology terms of category molecular function as retrieved from DAVID database
Vesiclepedia Top 100	"+" indicates listing in Top 100 most frequently observations of Vesiclepedia database
M. tuberculosis protein	"+" indicates protein of Mycobacterium tuberculosis origin
Secreted to blood	"+" indicates annotation as secreted to blood based on The Human Protein Atlas
ANOVA	columns underneath present statistics of ANOVA across all patient groups
PTB vs. HC	columns underneath present statistics of pairwise analysis of PTB patients vs. Healthy volunteers
TBL vs. HC	columns underneath present statistics of pairwise analysis of TBL patients vs. Healthy volunteers
TBL vs. PTB	columns underneath present statistics of pairwise analysis of TBL patients vs. PTB patients
Rx vs. PTB	columns underneath present statistics of pairwise analysis of PTB patients after anti-TB treatment vs. Untreated PTB patients
logFC_	log2-transformed ratios of indicated pairwise analysis
adj.pval_	Benjamini-Hochberg adjusted p vlaue of indicated statistical analysis
sig_	"+" indicates significance of indicated statistical analysis (adj. p < 0.05)
HC_1	individual normalized and log2-transformed measurement (reporter ion intensity) of first healthy volunteers
HC_2	individual normalized and log2-transformed measurement (reporter ion intensity) of second healthy volunteers
HC_3	individual normalized and log2-transformed measurement (reporter ion intensity) of third healthy volunteers
HC_4	individual normalized and log2-transformed measurement (reporter ion intensity) of fourth healthy volunteers
PTB_1	individual normalized and log2-transformed measurement (reporter ion intensity) of first PTB patient
PTB_2	individual normalized and log2-transformed measurement (reporter ion intensity) of second PTB patient
PTB_3	individual normalized and log2-transformed measurement (reporter ion intensity) of third PTB patient
PTB_4	individual normalized and log2-transformed measurement (reporter ion intensity) of fourth PTB patient
PTB_5	individual normalized and log2-transformed measurement (reporter ion intensity) of fifth PTB patient
PTB_6	individual normalized and log2-transformed measurement (reporter ion intensity) of sixth PTB patient
TBL_1	individual normalized and log2-transformed measurement (reporter ion intensity) of first TBL patient
TBL_2	individual normalized and log2-transformed measurement (reporter ion intensity) of second TBL patient
TBL_3	individual normalized and log2-transformed measurement (reporter ion intensity) of third TBL patient
Rx_1	individual normalized and log2-transformed measurement (reporter ion intensity) of first PTB patient after anti-TB treatment
Rx_2	individual normalized and log2-transformed measurement (reporter ion intensity) of second PTB patient after anti-TB treatment
Rx_3	individual normalized and log2-transformed measurement (reporter ion intensity) of third PTB patient after anti-TB treatment
