# Supplementary material for: Mycobacterium tuberculosis Affects Protein and Lipid Content of Circulating Exosomes in Infected Patients Depending on Tuberculosis Disease State
Source: Biomedicines. 2022 Mar 27;10(4):783. doi: 10.3390/biomedicines10040783 (PMC9025801; doi:10.3390/biomedicines10040783)
Supplement: Supplementary file 1 [file biomedicines-10-00783-s001.zip › Table S4.xlsx]

## Sheet: Table S4
Table S4
Gene ontology term overrepresentation test and clustering
Category	Term	Name	Count	PValue	Cluster
GOTERM_BP_DIRECT	GO:0000086	G2/M transition of mitotic cell cycle	9	0.00146578	15
GOTERM_BP_DIRECT	GO:0000715	nucleotide-excision repair, DNA damage recognition	4	0.00539156	15
GOTERM_BP_DIRECT	GO:0000717	nucleotide-excision repair, DNA duplex unwinding	4	0.00474282	15
GOTERM_BP_DIRECT	GO:0001523	retinoid metabolic process	9	4.81e-06	5
GOTERM_BP_DIRECT	GO:0001895	retina homeostasis	10	9.15e-09	not assigned
GOTERM_BP_DIRECT	GO:0002227	innate immune response in mucosa	8	8.28e-08	4
GOTERM_BP_DIRECT	GO:0002576	platelet degranulation	41	8.83e-46	not assigned
GOTERM_BP_DIRECT	GO:0002755	MyD88-dependent toll-like receptor signaling pathway	5	0.00170703	15
GOTERM_BP_DIRECT	GO:0002756	MyD88-independent toll-like receptor signaling pathway	4	0.000978	15
GOTERM_BP_DIRECT	GO:0003094	glomerular filtration	3	0.00824165	14
GOTERM_BP_DIRECT	GO:0005978	glycogen biosynthetic process	4	0.00764602	15
GOTERM_BP_DIRECT	GO:0006094	gluconeogenesis	7	6.1e-05	7
GOTERM_BP_DIRECT	GO:0006096	glycolytic process	8	8.21e-07	7
GOTERM_BP_DIRECT	GO:0006297	nucleotide-excision repair, DNA gap filling	4	0.00609104	15
GOTERM_BP_DIRECT	GO:0006334	nucleosome assembly	15	5.43e-09	3
GOTERM_BP_DIRECT	GO:0006508	proteolysis	43	3.36e-19	1
GOTERM_BP_DIRECT	GO:0006641	triglyceride metabolic process	5	0.00213126	5
GOTERM_BP_DIRECT	GO:0006869	lipid transport	12	2.73e-08	5
GOTERM_BP_DIRECT	GO:0006898	receptor-mediated endocytosis	40	7.42e-33	1
GOTERM_BP_DIRECT	GO:0006910	phagocytosis, recognition	15	1.3e-18	2
GOTERM_BP_DIRECT	GO:0006911	phagocytosis, engulfment	16	1.43e-18	2
GOTERM_BP_DIRECT	GO:0006953	acute-phase response	14	1.51e-14	not assigned
GOTERM_BP_DIRECT	GO:0006954	inflammatory response	16	0.00100248	not assigned
GOTERM_BP_DIRECT	GO:0006955	immune response	35	4.15e-15	1
GOTERM_BP_DIRECT	GO:0006956	complement activation	41	1.79e-49	1
GOTERM_BP_DIRECT	GO:0006957	complement activation, alternative pathway	7	2.23e-08	9
GOTERM_BP_DIRECT	GO:0006958	complement activation, classical pathway	44	8.2e-52	1
GOTERM_BP_DIRECT	GO:0007010	cytoskeleton organization	9	0.00399371	10
GOTERM_BP_DIRECT	GO:0007017	microtubule-based process	6	0.000234	10
GOTERM_BP_DIRECT	GO:0007155	cell adhesion	24	1.05e-06	not assigned
GOTERM_BP_DIRECT	GO:0007160	cell-matrix adhesion	13	1.64e-08	not assigned
GOTERM_BP_DIRECT	GO:0007229	integrin-mediated signaling pathway	13	4.88e-08	not assigned
GOTERM_BP_DIRECT	GO:0007596	blood coagulation	25	1.46e-15	not assigned
GOTERM_BP_DIRECT	GO:0008203	cholesterol metabolic process	9	1.1e-05	5
GOTERM_BP_DIRECT	GO:0010628	positive regulation of gene expression	11	0.00861329	12
GOTERM_BP_DIRECT	GO:0010873	positive regulation of cholesterol esterification	6	1.11e-07	5
GOTERM_BP_DIRECT	GO:0010898	positive regulation of triglyceride catabolic process	3	0.00647703	5
GOTERM_BP_DIRECT	GO:0010903	negative regulation of very-low-density lipoprotein particle remodeling	3	0.000731	5
GOTERM_BP_DIRECT	GO:0010916	negative regulation of very-low-density lipoprotein particle clearance	3	0.00144695	8
GOTERM_BP_DIRECT	GO:0010939	regulation of necrotic cell death	4	0.000761	15
GOTERM_BP_DIRECT	GO:0010951	negative regulation of endopeptidase activity	20	4.68e-14	not assigned
GOTERM_BP_DIRECT	GO:0019068	virion assembly	5	2.68e-05	15
GOTERM_BP_DIRECT	GO:0019433	triglyceride catabolic process	4	0.00684222	5
GOTERM_BP_DIRECT	GO:0019731	antibacterial humoral response	11	1.21e-09	4
GOTERM_BP_DIRECT	GO:0019835	cytolysis	4	0.00414372	9
GOTERM_BP_DIRECT	GO:0030168	platelet activation	25	1.68e-20	not assigned
GOTERM_BP_DIRECT	GO:0030198	extracellular matrix organization	18	1.35e-08	not assigned
GOTERM_BP_DIRECT	GO:0030300	regulation of intestinal cholesterol absorption	3	0.00238657	5
GOTERM_BP_DIRECT	GO:0030388	fructose 1,6-bisphosphate metabolic process	3	0.00490851	7
GOTERM_BP_DIRECT	GO:0030449	regulation of complement activation	13	1.19e-14	not assigned
GOTERM_BP_DIRECT	GO:0031102	neuron projection regeneration	3	0.00647703	5
GOTERM_BP_DIRECT	GO:0031589	cell-substrate adhesion	4	0.00221913	13
GOTERM_BP_DIRECT	GO:0031639	plasminogen activation	5	7.07e-06	11
GOTERM_BP_DIRECT	GO:0032375	negative regulation of cholesterol transport	3	0.00144695	8
GOTERM_BP_DIRECT	GO:0032479	regulation of type I interferon production	4	0.000978	15
GOTERM_BP_DIRECT	GO:0032489	regulation of Cdc42 protein signal transduction	3	0.00238657	5
GOTERM_BP_DIRECT	GO:0033344	cholesterol efflux	9	2.88e-09	5
GOTERM_BP_DIRECT	GO:0033627	cell adhesion mediated by integrin	4	0.00151976	13
GOTERM_BP_DIRECT	GO:0033700	phospholipid efflux	7	3.86e-08	5
GOTERM_BP_DIRECT	GO:0033700	phospholipid efflux	7	3.86e-08	8
GOTERM_BP_DIRECT	GO:0034372	very-low-density lipoprotein particle remodeling	3	0.00490851	5
GOTERM_BP_DIRECT	GO:0034374	low-density lipoprotein particle remodeling	5	1.81e-05	5
GOTERM_BP_DIRECT	GO:0034375	high-density lipoprotein particle remodeling	7	6.34e-08	5
GOTERM_BP_DIRECT	GO:0034380	high-density lipoprotein particle assembly	5	3.98e-06	5
GOTERM_BP_DIRECT	GO:0034382	chylomicron remnant clearance	4	7.42e-05	5
GOTERM_BP_DIRECT	GO:0034382	chylomicron remnant clearance	4	7.42e-05	8
GOTERM_BP_DIRECT	GO:0034384	high-density lipoprotein particle clearance	5	8.74e-07	5
GOTERM_BP_DIRECT	GO:0035666	TRIF-dependent toll-like receptor signaling pathway	4	0.00941462	15
GOTERM_BP_DIRECT	GO:0038095	Fc-epsilon receptor signaling pathway	26	5.68e-17	1
GOTERM_BP_DIRECT	GO:0038096	Fc-gamma receptor signaling pathway involved in phagocytosis	29	1.91e-24	1
GOTERM_BP_DIRECT	GO:0042059	negative regulation of epidermal growth factor receptor signaling pathway	5	0.00236842	15
GOTERM_BP_DIRECT	GO:0042157	lipoprotein metabolic process	11	2.5e-10	5
GOTERM_BP_DIRECT	GO:0042158	lipoprotein biosynthetic process	5	7.07e-06	5
GOTERM_BP_DIRECT	GO:0042276	error-prone translesion synthesis	4	0.00308974	15
GOTERM_BP_DIRECT	GO:0042632	cholesterol homeostasis	8	6.34e-05	5
GOTERM_BP_DIRECT	GO:0042730	fibrinolysis	10	1.28e-11	not assigned
GOTERM_BP_DIRECT	GO:0042742	defense response to bacterium	17	1.12e-09	2
GOTERM_BP_DIRECT	GO:0043065	positive regulation of apoptotic process	13	0.0029094	not assigned
GOTERM_BP_DIRECT	GO:0043623	cellular protein complex assembly	4	0.00263223	11
GOTERM_BP_DIRECT	GO:0043691	reverse cholesterol transport	8	6.02e-09	5
GOTERM_BP_DIRECT	GO:0044267	cellular protein metabolic process	11	1.71e-05	15
GOTERM_BP_DIRECT	GO:0045087	innate immune response	41	6.83e-20	not assigned
GOTERM_BP_DIRECT	GO:0045742	positive regulation of epidermal growth factor receptor signaling pathway	5	0.000495	15
GOTERM_BP_DIRECT	GO:0045833	negative regulation of lipid metabolic process	3	0.00144695	8
GOTERM_BP_DIRECT	GO:0048261	negative regulation of receptor-mediated endocytosis	4	0.000203	8
GOTERM_BP_DIRECT	GO:0050776	regulation of immune response	26	5.68e-17	1
GOTERM_BP_DIRECT	GO:0050830	defense response to Gram-positive bacterium	9	5.68e-05	4
GOTERM_BP_DIRECT	GO:0050853	B cell receptor signaling pathway	14	1.67e-12	2
GOTERM_BP_DIRECT	GO:0050871	positive regulation of B cell activation	14	2.28e-17	2
GOTERM_BP_DIRECT	GO:0050900	leukocyte migration	14	6.39e-08	not assigned
GOTERM_BP_DIRECT	GO:0051006	positive regulation of lipoprotein lipase activity	4	0.000425	5
GOTERM_BP_DIRECT	GO:0051258	protein polymerization	4	0.000978	11
GOTERM_BP_DIRECT	GO:0051403	stress-activated MAPK cascade	5	0.000289	15
GOTERM_BP_DIRECT	GO:0060267	positive regulation of respiratory burst	3	0.00354275	14
GOTERM_BP_DIRECT	GO:0061418	regulation of transcription from RNA polymerase II promoter in response to hypoxia	4	0.00941462	15
GOTERM_BP_DIRECT	GO:0061621	canonical glycolysis	8	1.12e-07	7
GOTERM_BP_DIRECT	GO:0070328	triglyceride homeostasis	6	4.64e-05	5
GOTERM_BP_DIRECT	GO:0070374	positive regulation of ERK1 and ERK2 cascade	9	0.00650484	11
GOTERM_BP_DIRECT	GO:0070423	nucleotide-binding oligomerization domain containing signaling pathway	4	0.00684222	15
GOTERM_BP_DIRECT	GO:0070527	platelet aggregation	15	9.37e-16	not assigned
GOTERM_BP_DIRECT	GO:0070987	error-free translesion synthesis	4	0.00308974	15
GOTERM_BP_DIRECT	GO:0072378	blood coagulation, fibrin clot formation	4	1.52e-05	11
GOTERM_BP_DIRECT	GO:0090131	mesenchyme migration	4	3.75e-05	12
GOTERM_BP_DIRECT	GO:0090277	positive regulation of peptide hormone secretion	3	0.00647703	11
GOTERM_BP_DIRECT	GO:0098609	cell-cell adhesion	13	0.00124733	6
GOTERM_CC_DIRECT	GO:0000786	nucleosome	12	1.6e-07	3
GOTERM_CC_DIRECT	GO:0000788	nuclear nucleosome	15	1.53e-15	3
GOTERM_CC_DIRECT	GO:0005576	extracellular region	132	1.9e-65	not assigned
GOTERM_CC_DIRECT	GO:0005577	fibrinogen complex	6	8.73e-08	11
GOTERM_CC_DIRECT	GO:0005579	membrane attack complex	3	0.0044679	9
GOTERM_CC_DIRECT	GO:0005615	extracellular space	115	2.58e-57	not assigned
GOTERM_CC_DIRECT	GO:0005769	early endosome	12	0.000703	5
GOTERM_CC_DIRECT	GO:0005788	endoplasmic reticulum lumen	11	0.000657	not assigned
GOTERM_CC_DIRECT	GO:0005829	cytosol	68	0.00497829	not assigned
GOTERM_CC_DIRECT	GO:0005886	plasma membrane	110	8.09e-11	not assigned
GOTERM_CC_DIRECT	GO:0005913	cell-cell adherens junction	19	1.96e-06	6
GOTERM_CC_DIRECT	GO:0005925	focal adhesion	32	3.57e-14	not assigned
GOTERM_CC_DIRECT	GO:0008305	integrin complex	5	0.000659	13
GOTERM_CC_DIRECT	GO:0009897	external side of plasma membrane	25	1.53e-14	2
GOTERM_CC_DIRECT	GO:0009986	cell surface	24	7.72e-06	not assigned
GOTERM_CC_DIRECT	GO:0016020	membrane	51	0.00166472	not assigned
GOTERM_CC_DIRECT	GO:0030027	lamellipodium	9	0.00288222	12
GOTERM_CC_DIRECT	GO:0030175	filopodium	8	9.2e-05	12
GOTERM_CC_DIRECT	GO:0030666	endocytic vesicle membrane	6	0.00308674	15
GOTERM_CC_DIRECT	GO:0031012	extracellular matrix	24	1.25e-10	not assigned
GOTERM_CC_DIRECT	GO:0031091	platelet alpha granule	4	0.00107089	11
GOTERM_CC_DIRECT	GO:0031093	platelet alpha granule lumen	25	9.49e-30	not assigned
GOTERM_CC_DIRECT	GO:0034361	very-low-density lipoprotein particle	13	1.13e-17	5
GOTERM_CC_DIRECT	GO:0034362	low-density lipoprotein particle	6	1.3e-06	5
GOTERM_CC_DIRECT	GO:0034363	intermediate-density lipoprotein particle	4	1.32e-05	5
GOTERM_CC_DIRECT	GO:0034364	high-density lipoprotein particle	14	6.28e-19	5
GOTERM_CC_DIRECT	GO:0034366	spherical high-density lipoprotein particle	8	1.24e-12	5
GOTERM_CC_DIRECT	GO:0042571	immunoglobulin complex, circulating	11	3.96e-14	2
GOTERM_CC_DIRECT	GO:0042627	chylomicron	10	6.24e-14	5
GOTERM_CC_DIRECT	GO:0043025	neuronal cell body	12	0.00818076	not assigned
GOTERM_CC_DIRECT	GO:0043209	myelin sheath	18	1.31e-10	not assigned
GOTERM_CC_DIRECT	GO:0070062	extracellular exosome	186	5.67e-86	not assigned
GOTERM_CC_DIRECT	GO:0071748	monomeric IgA immunoglobulin complex	3	0.000664	14
GOTERM_CC_DIRECT	GO:0071751	secretory IgA immunoglobulin complex	3	0.000664	14
GOTERM_CC_DIRECT	GO:0071752	secretory dimeric IgA immunoglobulin complex	3	0.000664	14
GOTERM_CC_DIRECT	GO:0072562	blood microparticle	87	2.2e-120	not assigned
GOTERM_MF_DIRECT	GO:0003823	antigen binding	34	6.18e-35	1
GOTERM_MF_DIRECT	GO:0003823	antigen binding	34	6.18e-35	2
GOTERM_MF_DIRECT	GO:0003924	GTPase activity	23	1.19e-11	not assigned
GOTERM_MF_DIRECT	GO:0004252	serine-type endopeptidase activity	42	4.35e-30	1
GOTERM_MF_DIRECT	GO:0004332	fructose-bisphosphate aldolase activity	3	0.000696	7
GOTERM_MF_DIRECT	GO:0004866	endopeptidase inhibitor activity	12	1.4e-11	not assigned
GOTERM_MF_DIRECT	GO:0004867	serine-type endopeptidase inhibitor activity	11	2.37e-06	not assigned
GOTERM_MF_DIRECT	GO:0005102	receptor binding	15	0.00115299	not assigned
GOTERM_MF_DIRECT	GO:0005178	integrin binding	14	7.7e-09	not assigned
GOTERM_MF_DIRECT	GO:0005200	structural constituent of cytoskeleton	11	7.42e-06	10
GOTERM_MF_DIRECT	GO:0005319	lipid transporter activity	8	1.21e-08	5
GOTERM_MF_DIRECT	GO:0005525	GTP binding	21	2.1e-06	not assigned
GOTERM_MF_DIRECT	GO:0005543	phospholipid binding	11	7.73e-07	5
GOTERM_MF_DIRECT	GO:0008201	heparin binding	14	1.14e-06	not assigned
GOTERM_MF_DIRECT	GO:0008289	lipid binding	10	0.000545	5
GOTERM_MF_DIRECT	GO:0015485	cholesterol binding	7	3.53e-05	5
GOTERM_MF_DIRECT	GO:0016209	antioxidant activity	4	0.00335481	5
GOTERM_MF_DIRECT	GO:0017127	cholesterol transporter activity	5	6.47e-05	5
GOTERM_MF_DIRECT	GO:0031210	phosphatidylcholine binding	6	2.2e-05	5
GOTERM_MF_DIRECT	GO:0034987	immunoglobulin receptor binding	15	2.28e-19	2
GOTERM_MF_DIRECT	GO:0042802	identical protein binding	23	0.0027711	not assigned
GOTERM_MF_DIRECT	GO:0046982	protein heterodimerization activity	20	0.000108	3
GOTERM_MF_DIRECT	GO:0050839	cell adhesion molecule binding	6	0.0025962	11
GOTERM_MF_DIRECT	GO:0055102	lipase inhibitor activity	5	7.93e-07	5
GOTERM_MF_DIRECT	GO:0055102	lipase inhibitor activity	5	7.93e-07	8
GOTERM_MF_DIRECT	GO:0060228	phosphatidylcholine-sterol O-acyltransferase activator activity	5	7.93e-07	5
GOTERM_MF_DIRECT	GO:0070653	high-density lipoprotein particle receptor binding	3	0.000696	5
GOTERM_MF_DIRECT	GO:0098641	cadherin binding involved in cell-cell adhesion	19	5.72e-07	6

## Sheet: column description
Column name	description
Category	Category of corresponding gene ontology (GO) direct term (BP: biological process, CC: cellular component, MF: molecular function)
Term	Identifier of term in GO database
Name	Name of term in GO database
Count	Number of identified proteins assigned to the term
PValue	significance of enrichment represented as p value of modified Fisher's exact test (EASE score)
Cluster	Cluster assigned by DAVID functional clustering analysis at standard parameters ("not assigned" represent terms with significant enrichment but no cluster assignment)
